# Supplementary material for: Novel Widespread Marine Oomycetes Parasitising Diatoms, Including the Toxic Genus Pseudo-nitzschia: Genetic, Morphological, and Ecological Characterisation
Source: PubMed Central journal article supplement (PMC6286980; doi:10.3389/fmicb.2018.02918), 2018-12-03
Supplement: Image_2.pdf [file Image_2.pdf]

**OOM\_1\_2 vs *Pseudo-nitzschia* and *Cerataulina pelagica* OTUs**

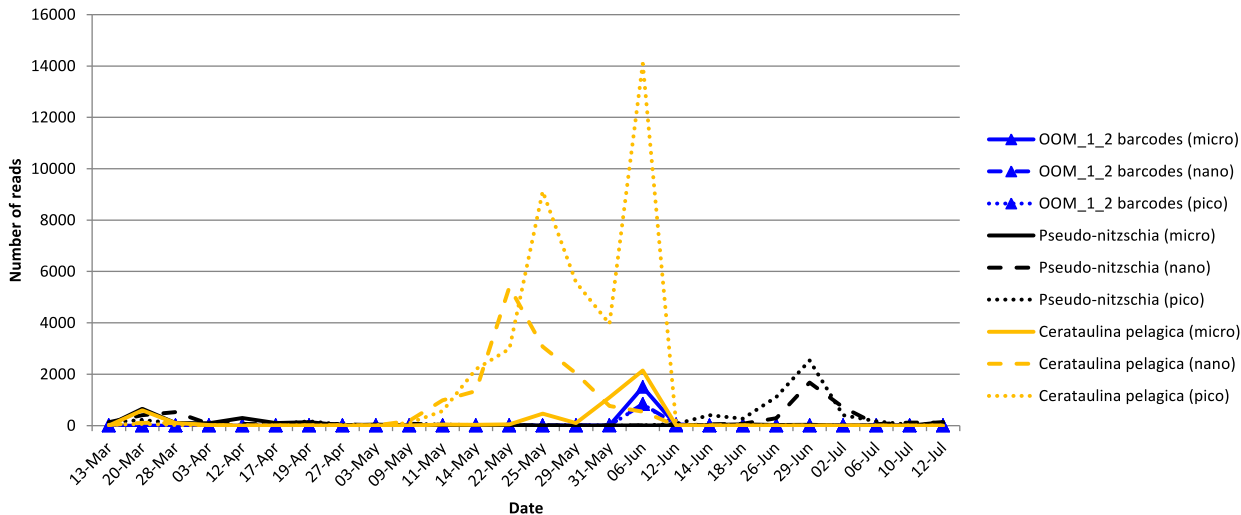

**Fig S2 | Trend of *Pseudo-nitzschia* (black) and *Cerataulina pelagica* (yellow) OTUs in relation to the barcode associated to OOM\_1\_2 (blue). Solid lines indicate microplankton (> 20 μm), dashed lines nano plankton (20 – 3 μm) and dotted lines picoplankton (< 3 μm). Y axis indicates the read numbers whilst X axis indicates dates.**
