# Supplementary material for: Novel Widespread Marine Oomycetes Parasitising Diatoms, Including the Toxic Genus Pseudo-nitzschia: Genetic, Morphological, and Ecological Characterisation
Source: PubMed Central journal article supplement (PMC6286980; doi:10.3389/fmicb.2018.02918), 2018-12-03
Supplement: Image_3.pdf [file Image_3.pdf]

## OOM\_2 vs *Pseudo-nitzschia* OTUs

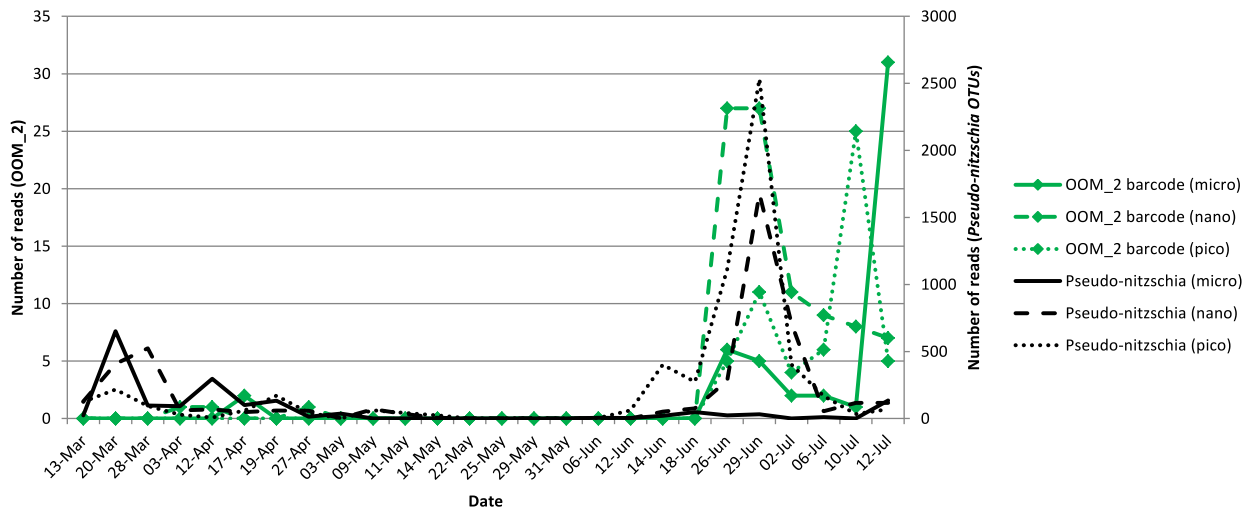

**Fig. S3|Trend of *Pseudo-nitzschia* OTUs (black) in relation to the barcode associated to OOM\_2 (green).** Solid lines indicate microplankton ( $> 20 \mu\text{m}$ ), dashed lines nano plankton ( $20 - 3 \mu\text{m}$ ) and dotted lines picoplankton ( $< 3 \mu\text{m}$ ). Note that the read numbers for OOM\_2 are shown on the left Y axis, whilst read numbers for *Pseudo-nitzschia* OTUs are shown on the right Y axis. X axis indicate sampling dates.
