# Supplementary material for: Novel Widespread Marine Oomycetes Parasitising Diatoms, Including the Toxic Genus Pseudo-nitzschia: Genetic, Morphological, and Ecological Characterisation
Source: PubMed Central journal article supplement (PMC6286980; doi:10.3389/fmicb.2018.02918), 2018-12-03
Supplement: Image_5.pdf [file Image_5.pdf]

***P. australis* 10-044**

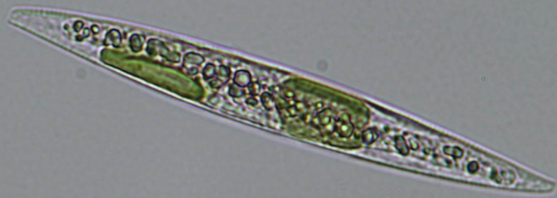

20  $\mu$ m

***P. australis* 10-045**

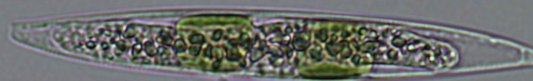

20  $\mu$ m

***P. cf. plurisecta* 12-150**

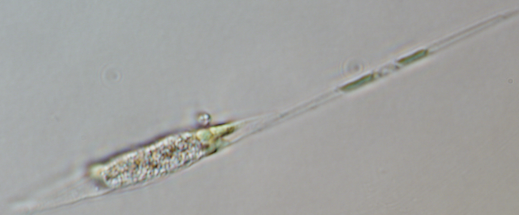

20  $\mu$ m

***P. fraudulenta* 13-374**

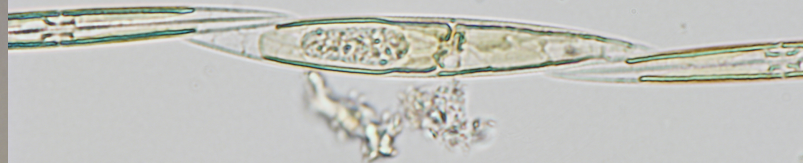

20  $\mu$ m

***P. pungens* 14-236**

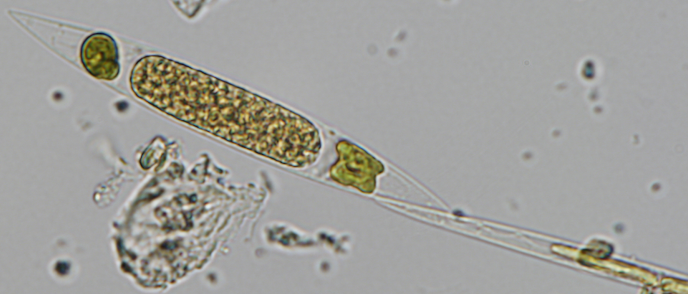

20  $\mu$ m

***M. cf. nummuloides* Melo1para**

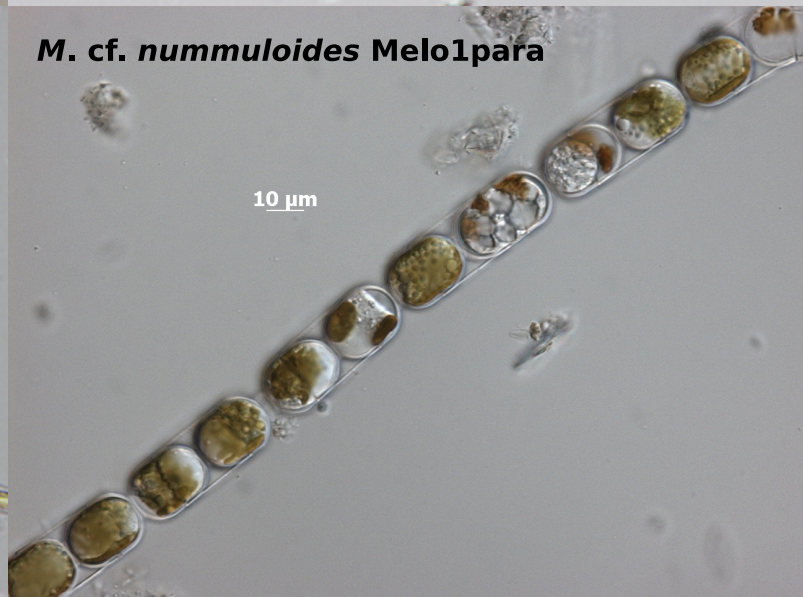

10  $\mu$ m

**Fig.S5|Sequenced single cell isolates.** Pictures show the single cell (or colony) sequenced to obtain the genetic marker indicated by the name of the host diatom and PCR code on the top left side. Table 1, summarizing the details for each isolate, is reported in the main text.
