# Supplementary material for: Novel Widespread Marine Oomycetes Parasitising Diatoms, Including the Toxic Genus Pseudo-nitzschia: Genetic, Morphological, and Ecological Characterisation
Source: Front Microbiol. 2018 Dec 3;9:2918. doi: 10.3389/fmicb.2018.02918 (PMC6286980; doi:10.3389/fmicb.2018.02918)
Supplement: Supplementary file 3 [file Data_Sheet_1.fasta]

>Eukaryote_marine_clone_ME1-21
--C--GCGTTTATTAGATAGAAACCAAT-GCTCTTCGGAGGTTTTGT-GGTGATTCATAATAACTGTGCGAATCGCATGCGT---CAGCGGCGATGAATCAATCAAGTTTCTGCCCTATCAGCTTTCGATGGTAGGGTATTGGCCTACCATGGCGTTAACGGGTGACGGAGAATTAGGGTTCGATTCCGGAGAGGGAGCCTGAGAAACGGCTACCACATCCAAGGAAGGCAGCGGGCGCGTAAATTACCCAATCCTGACACAGGGAGGTAGTGACAATAAATAACAATGCCGGGCTTTTTCAAGTCTGGCAATTGGAATGAGAACAATTTAAATCCCTTAACGAGGATCAATTGGAGGGCAAGTCTGGTGCCAGCAGCCGCGGTAATTCCAGCTCCAATAGCGTATATTAAAGTTGTTGCAGTTAAAAAGCTCGTAGTTGGATT-T--CTGG-TGGGAGCG--ATCGGTCCGCCCCG-CA-A--GGGGTGTGT-ACTAGCGTCGTCTCC-GGCCATCCT-TGTGGGAACT-GTG----C-GGCCCTTA-----G--TTGGACT--GTATATGGG----AAC-A--CATCGTTTACTGTGAAAAAATTAGAGTGTTTAAAGCAGGC-TT-AAGCCGTTGAATACATTAGCATGGAATAATAAGATAAGAC----TTGG--GTCATTATTTTGTTGGTTTGCGGATC--GAGGTAATGATTAATAGGGATAGTTGGGGGTATTCATATTTAATTGTCAGAGGTGAAATTCTTGGATTTATGAAAGATGAACTTAGGCGAAAGCATTTACCAAGGATGTTTTCATTAATCAAGAACGAAAGTTAGGGGATCGAAGATGATTAGATACCATCGTAGCCTTAACCATAAACTATGCCGACTAGGGATTGGCGGTCGTTAC-TTAATGACTCC--GTCAGCACCTTATGAGAAATCAAAGTCTTTGGGTTCCGGGGGGAGTATGGTCGCAAGGCT------------------------------------------------------------------------------------------------------------------------------------------------------------------------------------------------------------------------------------------------------------------------------------------------------------------------------------------------------------------------------------------------------------------------------------------------------------------------------------------------------------------------------------------------------------------------------------------------------------------------------------------------
>Eukaryote_marine_clone_ME1-22
--C--GCGTTTATTAGATAGAAACCCATA----TT-------TTT---GGTGAATCATAATAACTGTGCGAATCGCATGGGTTTACCCCGGCGATGAATCAATCAAGTTTCTGCCCTATCAGCTTTCGATGGTAGGGTATTGGCCTACCATGGCGTTAACGGGTAACGGAGAATTAGGGTTCGATTCCGGAGAGGGAGCCTGAGAAACGGCTACCACATCCAAGGAAGGCAGCAGGCGCGTAAATTACCCAATCCTGACACAGGGAGGTAGTGACAATAAATAACAATGCCGGGCTTTTTCAAGTCTGGCAATTGGAATGAGAACAATTTAAATCCCTTAACGAGGATCAATTGGAGGGCAAGTCTGGTGCCAGCAGCCGCGGTAATTCCAGCTCCAATAGCGTATATTAATGTTGTTGCAGTTAAAAAGCTCGTAGTTGGATT-T--CTGG-TGGGAGTG--GCCGGTCCGCC--GT-A-A----GGTGTGT-ACTTG-GTTGTCTCCTG-TCATCCT-TGTGGGAACT-GCT----CTGG-CATTAA----G--TT-GTCGGGGT-TA-GGG----AAC-A--CATCGTTTACTGTGAAAAAATTAGAGTGTTTAAAGCAGGC-TT-ATGCCGTTGAATACATTAGCATGGAATAATAAGATAGGAC---TTTGG-CGTC--TATTTTGTTGGTTTGCACACCA--AGGTAATGATTAATAGGGATAGTTGGGGGTATTCGTATTTAATTGTCAGAGGTGAAATTCTTGGATTTATGAAAGACGAACTTCTGCGAAAGCATTTACCAAAGATGTTTTCATTAATCAAGAACGAAAGTTAGGGGATCGAAGATGATTAGATACCATCGTAGTCTTAACCATAAACTATGCCGACTAGGGATTGGCGGTCGTT-CATTTATGACTCC--GTCAGCACCTTATGAGAAATCAAAGTCTTTGGGTTCCGGGGGGAGTATGGTCGCAAGGCT------------------------------------------------------------------------------------------------------------------------------------------------------------------------------------------------------------------------------------------------------------------------------------------------------------------------------------------------------------------------------------------------------------------------------------------------------------------------------------------------------------------------------------------------------------------------------------------------------------------------------------------------
>Uncultured_stramenopile_clone_RA000412.91
--CT-GCGTTTATTAGATTGAAACCAATAGC--TTCGGC---TTTCTCGGTGAATCATAATAACTGTGCGGATCGC----GTT--C-GC-GCGACAAATCAATCGAGTTTCTGCCCTATCAGCTTTGGATGGTAGGGTATTGGCCTACCATGGCGTTAACGGGTAACGGAGAATTAGGGTTCGATTCCGGAGAGGGAGCCTGAGAAACGGCTACCACATCCAAGGAAGGCAGCAGGCGCGTAAATTACCCAATCCTGACACAGGGAGGTAGTGACAATAAATAACAATGCCGGGCTTTTTCAAGTCTGGCAAT-GGAATGAGAACAAT-TAAATCCCTTAACGAGTATCAATTGGAGGGCAAGTCTGGTGCCAGCAGCCGCGGTAATTCCAGCTCCAATAGCGTATATTAAAGTTGTTGCAGTTAAAAAGCTCGTAGTTGGATT-T--CTGG-TAGGAGCG--ACCGGTCCGCCCTGTTA-A---GGGTGTGT-ACTAGCGTTGTCT-CTGGCCATCCT-TGGGGGAACT-GCG----CGGGG-----A----GACTT-G-C---GT-TA-GGG----AAC-C--CATCGTTTACTGTGAAAAAATTAGAGTGTTTAAAGCAGGC-TT-ATGCCGTTGAATACATTAGCATGGAATAATAAGATAGGAC-CGCGTGGTCGTC------TTGTTGGTTTGC--ACCACGAGGTAATGATTAATAGGTACAGTTGGGGGTATTCGTATTTAATTGTCAGAGGTGAAATTCTTGGATTTATGAAAGACGAACTTCTGCGAAAGCATTTACCAAGGATGTTTTCATAAATCAAGAACGAAAGTTAGGGGATCGAAGATGATTAGATACCATCGTAGTCTTAACCATAAACTATGCCGACTAGGGATAGGCGGTCGTTTC-TTT-TGACCCC--GTCTGCACCTTATGAGAAATCAAAGTCTTTGGGTTCCGGGGGGAGTATGGTCGCAAGGCT------------------------------------------------------------------------------------------------------------------------------------------------------------------------------------------------------------------------------------------------------------------------------------------------------------------------------------------------------------------------------------------------------------------------------------------------------------------------------------------------------------------------------------------------------------------------------------------------------------------------------------------------
>Uncultured_marine_stramenopile_DH144-EKD10
--C--GCGTTTATTAGATAGAAACCAAT-GCTCTTCGGAGGTTTTGT-GGTGATTCATAATAACTGTGCGAATCGCATGCGT---CAGCGGCGATGAATCAATCAAGTTTCTGCCCTATCAGCTTTCGATGGTAGGGTATTGGCCTACCATGGCGTTAACGGGTGACGGAGAATTAGGGTTCGATTCCGGAGAGGGAGCCTGAGAAACGGCTACCACATCCAAGGAAGGCAGCAGGCGCGTAAATTACCCAATCCTGACACAGGGAGGTACTGACAATAAATAACAATGCCGGGCTTTTTCAAGTCTGGCAATTGGAATGAGAACAATTTAAATCCCTTAACGAGGATCAATTGGAGGGCAAGTCTGGTGCCAGCAGCCGCGGTAATTCCAGCTCCAATAGCGTATATTAAAGTTGTTGCAGTTAAAAAGCTCGTAGTTGGATT-T--CTGGCT-GGAGCG--ATCGGTCCGCCCCG-CA-A--GGGGCGTGT-ACTAGCGTCGTCTCC-GA-CATCCT-TGTGGGAACT-GTG----C-GG-CGTTAACTCGG--TT-G------TATATGGG----AAC-A--CATCGTTTACTGTGAAAAAATTAGAGTGTTTAAAGCAGGC-TT-AAGCCGTTGAATACATTAGCATGGAATAATAAGATAAGAC----TTGG--GTCATTATTTTGTTGGTTTGCGGATC--GAGGTAATGATTAATAGGGATAGTTGGGGGTATTCATATTTAATTGTCAGAGGTGAAATTCTTGGATTTATGAAAGATGAACTTAGGCGAAAGCATTTACCAAGGATGTTTTCATTAATCAAGAACGAAAGTTAGGGGATCGAAGATGATTAGATACCATCGTAGTCTTAACCATAAACTATGCCGACTAGGGATTGGCGGTCGTTAC-TTAATGACTCC--GTCAGCACCTTATGAGAAATCAAAGTCTTTGGGTTCCGGGGGGAGTATGGTCGCAAGGCT------------------------------------------------------------------------------------------------------------------------------------------------------------------------------------------------------------------------------------------------------------------------------------------------------------------------------------------------------------------------------------------------------------------------------------------------------------------------------------------------------------------------------------------------------------------------------------------------------------------------------------------------
>Uncultured_stramenopile_clone_BAQA232
--C--GCGTTTATTAGATAGAAACCCATA----TT-------TTT---GGTGAATCATAATAACTGTGCGAATCGCATGGGTTTACCCCGGCGATGAATCAATCAAGTTTCTGCCCTATCAGCTTTCGATGGTAGGGTATTGGCCTACCATGGCGTTAACGGGTAACGGAGAATTAGGGTTCGATTCCGGAGAGGGAGCCTGAGAAACGGCTACCACATCCAAGGAAGGCAGCAGGCGCGTAAATTACCCAATCCTGACACAGGGAGGTAGTGACAATAAATAACAATGCCGGGCTTTTTTAAGTCTGGCAATTGGAATGAGAACAATTTAAATCCCTTAACGAGGATCAATTGGAGGGCAAGTCTGGTGCCAGCAGCCGCGGTAATTCCAGCTCCAATAGCGTATATTAATGTTGTTGCAGTTAAAAAGCTCGTAGTTGGGTT-T--CTGG-TGGGAGCG--GCCGGTCCGCC--G-CA-A----GGTGTGT-ACTTG-GTTGTCTCCTG-TCATCCT-TGTGGGAACT-GCT----CTGG-CATTAA----G--TT-GTCGGGGT-TA-GGG----AAC-A--CATCGTTTACTGTGAAAAAATTAGAGTGTTTAAAGCAGGC-TT-ATGCCGTTGAATACATTAGCATGGAATAATAAGATAGGAC---TTTGG-CGTC--TATTTTGTTGGTTTGCACACCA--AGGTAATGATTAATAGGGATAGTTGGGGGTATTCGTATTTAATTGTCAGAGGTGAAATTCTTGGATTTATGAAAGACGAACTTCTGCGAAAGCATTTACCAAAGATGTTTTCATTAATCAAGAACGAAAGTTAGGGGATCGAAGATGATTAGATACCATCGTAGTCTTAACCATAAACTATGCCGACTAGGGATTGGCGGTCGTT-CATTTATGACTCC--GTCAGCACCTTATGAGAAATCAAAGTCTTTGGGTTCCGGGGGGAGTATGGTCGCAAGGCT------------------------------------------------------------------------------------------------------------------------------------------------------------------------------------------------------------------------------------------------------------------------------------------------------------------------------------------------------------------------------------------------------------------------------------------------------------------------------------------------------------------------------------------------------------------------------------------------------------------------------------------------
>14_236
--------------------------------------------------------------------------------------------------------------------------------------------------------------------------------------------------------------------------------------------------------------------------------------------------------------------------------------------------------------------------------------------------------CTCC-ATAGCGTATATTA-AGTTGTTGCAGTTAAAAAGCTCGTAGTTGGATTTG-CGTTT--GTGA-----AT--GAATA----GTGATCGTGAGATTGCG-GTTT-ATTTA--TC-AGA-CAT--TATTTGGG-ACTAGGGGTTTCTTGGCATTGA----G--TT-GT---------TGAGATTCAACTACCCATCGTTTACTGTGAAAAAATTAGAGTGTTTCAAGCAGGGGTTAATCCT-TTGAATATATTAGCATGGAATAATAAGATACGAC---TCGTATGGTC--TATTTTGTTGGTTTGCACATAT-GAG-TAATGATTAATAGGGACAGTTGGGGGTATTCATATTTGAGCGTCAGAGGTGAAATTCTTGGATCGCTGAAAAATGAGCTAAGGCGAAAGCATTTACCAAGGATGTTTTCATTAATCAAGAACGAAAGTTAGGGGATCGAAGATGATTAGATACCATCGTAGTCTTAACCGTAAACTATGCCGACTNNNNNNNNNNNNNNNNNNNNN--NNNNNNNNNNNNNNNNNNNNNNNNNNNNNNNNNNNNNNNNNNNNNNNNNNNNGAGTATGGTCGCAAGATT------------------------------------------------------------------------------------------------------------------------------------------------------------------------------------------------------------------------------------------------------------------------------------------------------------------------------------------------------------------------------------------------------------------------------------------------------------------------------------------------------------------------------------------------------------------------------------------------------------------------------------------------
>P.australis_parasite_Cahrente2
---TTGCATTTATTAGATTGAAACTAAT-----TTTAAA---------GTTGAGTCATAATAACTGTGCG----G-AT----------CGGCGATGAATCAATTGGGTTTCTGCCCTATCAGTTTTGGATGGCTGTGTATTGGACAGCCATGACATTAACGGGTAACGGGGAATTGGGGTTTGATACCGGAGAGGGCGCCTTAGAAATGGCGACCACATCCAAGGAAGGCAGCAGGCGCGTAAATTACCCAATCCTAATTCAGGGAGGTAGTGACTAGAAATAACGATTCGAGATG------A-TTTTGAAATTGGAATGAGAACAATTTAAATCCCTTATCGAGGATCAATTGGAGGGCAAGTCTGGTGCCAGCAGCCGCGGTAATTCCAGCTCCAATAGCGTATATTAAAGTTGTTGCAGTTAAAAAGCTCGTAGTTGGATT-G--GTGT-TG------------GT-TA----TTC-----------------------TA---C-----CA--ATAT--AGGA-TT---T----GGTGGCATTCA----------GT---------TG---------------TCGTTTACTGTGAAAAAATTAGAGTGTTTAAAGCAGGT-TT--TG-T-TTGAATACATTAGCATGGAATAATAATATATGAC---TCGTATGGTC--TATTTTGTTGGTTTGCACGTAT-GAG-TAATGATTAATAGGGACAGTTGGGGGTATTCATATTTGAGCGTCAGAGGTGAAATTCTTGGATCGCTGAAAGATGAGCTAAGGCGAAAGCATTTACCAAGGATGTTTTCATTAATCAAGAACGAAAGTTAGGGGATCGAAGATGATTAGATACCATCGTAGTCTTAACCATAAACTATGCCGACTCGGGATTG-----TGTTA------CCG--AACG--CAGCACCGTATGAGAAATCAAAGTCTTTGGGTTCCGGGGGGAGTATAGTCACAAGGCT------------------------------------------------------------------------------------------------------------------------------------------------------------------------------------------------------------------------------------------------------------------------------------------------------------------------------------------------------------------------------------------------------------------------------------------------------------------------------------------------------------------------------------------------------------------------------------------------------------------------------------------------
>P.australis_parasite_Charente1
---TTGCATTTATTAGATTGAAACTAAT-----TTTAAA---------GTTGAGTCATAATAACTGTGCG----G-AT----------CGGCGATGAATCAATTGGGTTTCTGCCCTATCAGTTTTGGATGGCTGTGTATTGGACAGCCATGACATTAACGGGTAACGGGGAATTGGGGTTTGATACCGGAGAGGGCGCCTTAGAAATGGCGACCACATCCAAGGAAGGCAGCAGGCGCGTAAATTACCCAATCCTAATTCAGGGAGGTAGTGACTAGAAATAACGATTCGAGATG------A-TTTTGAAATTGGAATGAGAACAATTTAAATCCCTTATCGAGGATCAATTGGAGGGCAAGTCTGGTGCCAGCAGCCGCGGTAATTCCAGCTCCAATAGCGTATATTAAAGTTGTTGCAGTTAAAAAGCTCGTAGTTGGATT-G--GTGT-TG------------GT-TA----TTC-----------------------TA---C-----CA--ATAT--AGGA-TT---T----GGTGGCATTCA----------GT---------TG---------------TCGTTTACTGTGAAAAAATTAGAGTGTTTAAAGCAGGT-TT--TG-T-TTGAATACATTAGCATGGAATAATAATATATGAC---TCGTATGGTC--TATTTTGTTGGTTTGCACGTAT-GAG-TAATGATTAATAGGGACAGTTGGGGGTATTCATATTTGAGCGTCAGAGGTGAAATTCTTGGATCGCTGAAAGATGAGCTAAGGCGAAAGCATTTACCAAGGATGTTTTCATTAATCAAGAACGAAAGTTAGGGGATCGAAGATGATTAGATACCATCGTAGTCTTAACCATAAACTATGCCGACTCGGGATTG-----TGTTA------CCG--AACG--CAGCACCGCATGAGAAATCAAAGTCTTTGGGATCCGGGGGGAGTATAGTCACAAGGCT------------------------------------------------------------------------------------------------------------------------------------------------------------------------------------------------------------------------------------------------------------------------------------------------------------------------------------------------------------------------------------------------------------------------------------------------------------------------------------------------------------------------------------------------------------------------------------------------------------------------------------------------
>P.fraudulenta_parasite
---TAGCATTTATTAGATTGAAACCAAT-G---TT-AA-----TTGA-GTTGAGTCATAGTAACTGTGCG----G-AT----------CGGCGATGAATCAATTGGGTTTCTGCCCTATCAGCTTTGGATGGCTGTGTATTGGACAGCCATGGCATTAACGGGTAACGGGGAATTAGGGTTTTATTCCGGAGAGGGAGCCTGAGAGACGGCTACCACATCCAAGGAAGGCAGCAGGCGCGTAAATTACCCAATCCTGACACAGGGAGGTAGTGACAATAAATAACAATCCTGGGCT-----TAGTCTAGGAATTGGAATGAGAACAATTTAAATCCCTTATCGAGGATCAATTGGAGGGCAAGTCTGGTGCCAGCAGCCGCGGTAATTCCAGCTCCAATAGCGTATATTAAAGTTGTTGCAGTTAAAAAGCTCGTAGTTGGATTTGTTGTTT--GAT------AT--GAT------GTG-----------------------TA---C-----CAC-AT-T---G----T---T----GGTGGCATTGA----------GT---------TG---------------TCTTTTACTGTGAAAAAATTAGAGTGTTTAAAGCAGACGTT--TG-T-TTGAATACATTAGCATGGAATAATAATATATGAC---TCGATTGGTC--TATTTTGTTGGTTTGCACATTT-GAG-TAATGATTAATAGGGACAGTTGGGGATATTCATATTTGAGCGTCAGAGGTGAAATTCTTGGATCGCTGAAAGATGAGCTAAGGCGAAAGCATTTATCAAGGATGTTTTCATTAATCAAGAACGAAAGTTAGGGGATCGAAGATGATTAGATACCATCGTAGTCTTAACCATAAACTATGCCGACTCGGGATTGGCCGTTGTTT-----TTGA--CATGGTCAGCACCGTATGAGAAATCAAAGTCTTTGGGTTCCGGGGGGAGTATGGTCGCAAGGCT------------------------------------------------------------------------------------------------------------------------------------------------------------------------------------------------------------------------------------------------------------------------------------------------------------------------------------------------------------------------------------------------------------------------------------------------------------------------------------------------------------------------------------------------------------------------------------------------------------------------------------------------
>P.australis_parasite_Oban
---TGGCATTTATTAGATTGAAACTAAT-----TTTAAA---------GTTGAGTCATAATAACTGTGCG----G-AT----------CGGCGATGAATCAATTGGGTTTCTGCCCTATCAGTTTTGGATGGCTGTGTATTGGACAGCCATGACATTAACGGGTAACGGGGAATTGGGGTTTGATACCGGAGAGGGCGCCTTAGAAATGGCGACCACATCCAAGGAAGGCAGCAGGCGCGTAAATTACCCAATCCTAATTCAGGGAGGTAGTGACTAGAAATAACGAT-TCGAGAT-----ATTT-T-GAAATTGGAATGAGAACAATTTAAATCCCTTATCGAGGATCAATTGGAGGGCAAGTCTGGTGCCAGCAGCCGCGGTAATTCCAGCTCCAATAGCGTATATTAAAGTTGTTGCAGNNAAAAAGCTCGTAGTTGGATT-G--GTGT-TGGTT-----AT--GTTTA----TTT---------------AC-----------C-----GAT--T-T--AG-A--A----------TGGCATTCA----------GT---------TG---------------TCGTTTACTGTGAAAAAATTAGAGTGTTTAAAGCAGG--TT--TG-T-TTGAATACATTAGCATGGAATAATAATATATGAC---TCGTATGGTC--TATTTTGTTGGTTTGCACGTAT-GAG-TAATGATTAATAGGGACACTTGGGGGTATTCATATTTGAGCGTCAGAGGTGAAATTTTTGGATCGTTGAAAGATGAGATAAGGCGAAAGCATTTACCAAGGATGTTTTCATTAATCAAGAACGAAAGTTAGGGGATCGAAGATGATTAGATACCATTGTAGTCTTAACCATAAACTATGCCGACTCGGGATTG-----TGTTA-----ACCG--AAC-G-CAGCACCGTATGAGAAATCAAAGTCTTTGGGTTCCGGGGGGAGTATAGTCAC-AGGCT------------------------------------------------------------------------------------------------------------------------------------------------------------------------------------------------------------------------------------------------------------------------------------------------------------------------------------------------------------------------------------------------------------------------------------------------------------------------------------------------------------------------------------------------------------------------------------------------------------------------------------------------
>M.cf._nummuloides_parasite
---TTGCATTTATTAGATTGAAACTAAT-----TTTAAA---------GTTGAGTCATAATAACTGTGCG----G-AT----------CGGCGATGAATCAATTGGGTTTCTGCCCTATCAGTTTTGGATGGCTGTGTATTGGACAGCCATGACATTAACGGGTAACGGGGAATTGGGGTTTGATACCGGAGAGGGCGCCTTAGAAATGGCGACCACATCCAAGGAAGGCAGCAGGCGCGTAAATTACCCAATCCTAATTCAGGGAGGTAGTGACTAGAAATAACGAT-TCGAGAT-----ATTT-T-GAAATTGGAATGAGAACAATTTAAATCCCTTATCGAGGATCAATTGGAGGGCAAGTCTGGTGCCAGCAGCCGCGGTAATTCCAGCTCCAATAGCGTATATTAAAGTTGTTGCAGTTAAAAAGCTCGTAGTTGGATT-G--GTGT-TGGTT-----AT--GTTTC----TCT---------------AC-----------C-----GAT--T-T--AG-A--A----------TGGCATTCA----------GT---------TG---------------TCGTTTACTGTGAAAAAATTAGAGTGTTTAAAGCAGG--TT--TG-T-TTGAATACATTAGCATGGAATAATAATATATGAC---TCGTATGGTC--TATTTTGTTGGTTTGCACGTAT-GAG-TAATGATTAATAGGGACAGTTGGGGGTATTCATATTTGAGCGTCAGAGGTGAAATTCTTGGATCGCTGAAAGATGAGCTAAGGCGAAAGCATTTACCAAGGATGTTTTCATTAATCAAGAACGAAAGTTAGGGGATCGAAGATGATTAGATACCATCGTAGTCTTAACCATAAACTATGCCGACTCGGGATTG-----TGTTA-----ACCG--AAC-G-CAGCACCGTATGAGAAATCAAAGTCTTTGGGTTCCGGGGGGAGTATAGTCAC-AGGCT------------------------------------------------------------------------------------------------------------------------------------------------------------------------------------------------------------------------------------------------------------------------------------------------------------------------------------------------------------------------------------------------------------------------------------------------------------------------------------------------------------------------------------------------------------------------------------------------------------------------------------------------
>Anisolpidium_ectocarpii
---TAGCATTTATTAGATTGAAACCAAT-C--CTT-AG-GGTATTGA-GTTGAGTCATAATAACTGTGCG----G-AT----------CGGCGATGAATCAAATGGGATTCTGCCCTATCAGCTTTGGTTGGGTGTGTATTGGACACCCAAGGCATTAACGGGT-ACGGGGAATCGGGGTTTGATTCCGGAGAGGGAGCCTGAGAAACGGCTACCACATCCAAGGAAGGCAGCAGGCGCGTAAATTACCCAATCCTGACACAGGGAGGTAGTGACAATAAATAACAATGCCGGGCT-----AAGTCTGGCAATTGGAATGAGAACAATTTAAATCCCTTAACGAGGATCAATTGAAGGGCAAGTCTGGTGCCAGCAGCCGCGGTAATTCCAGCTTCAATAGCGTATATCTAAGTTGTTGCAGTTAAAAAGCTCGTAGTTGGATA-T--CTGT-GTTGG-----AT--TGTTG----GTC---------------AC-----------------CAT-ATA-TTAGGC--T---T-----CTGACATTAA----------GT---------TG---------------TCGTTTACTGTGAAAAAATTAGAGTGTTTCAAGCAGGCGTT--TGCT-TTAAATACATTAGCATGGAATAATAAGATATGAC---TTGTGTGGTC--TATTTTGTTGGTTTGCACACGC-AAG-TAATGATTAATAGGGACAGTTGGGGGTATTCATATTTCAGTGTCAGAGGTGAAATTCTTGGATCGCTGAAAGATGAGCTTAGGCGAAAGCATTTACCATGGATGTTTTCATTAATCAAGAACGAAAGTTAGGGGATCGAAGATGATTAGATACCATCGTAGTCTTAACCATAAACTATGCCGACTCGGGATTGGCAGTCGTTA-----ATGA--CCTTGTCAGCACCGTATGAGAAATCAAAGTCTTTGGGTTCCGGGGAGAGTATGATCGC-AGGTT------------------------------------------------------------------------------------------------------------------------------------------------------------------------------------------------------------------------------------------------------------------------------------------------------------------------------------------------------------------------------------------------------------------------------------------------------------------------------------------------------------------------------------------------------------------------------------------------------------------------------------------------
>Anisolpidium_rosenvingii
---TAGCATTTATTAGATTGAAACCAAT-C--CTTTA--GGTATTGA-GTTGAGTCATAATAACTGTGCG----G-AT----------CGGCGATGAATCAAATGGGATTCTGCCCTATCAGCTTTGGTTGGGTGTGTATTGGACACCCAAGGCATTAACGGGT-ACGGGGAATCGGGGTTTGATTCCGGAGAGGGAGCCTGAGAAACGGCTACCACATCCAAGGAAGGCAGCAGGCGCGTAAATTACCCAATCCTGACACAGGGAGGTAGTGACAATAAATAACAATGCCGGGCT-----AAGTCTGGCAATTGGAATGAGAACAATTTAAATCCCTTAACGAGGATCAATTGAAGGGCAAGTCTGGTGCCAGCAGCCGCGGTAATTCCAGCTTCAATAGCGTATATCTAAGTTGTTGCAGTTAAAAAGCTCGTAGTTGGATT-T--CTGT-GTTGG-----AC--TCTGG----GTC---------------ACT----------------CAT-ATA-TTAGGC--T---C-----CTGGCATTAA----------GT---------TG---------------TCGTTTACTGTGAAAAAATTAGAGTGTTTCAAGCAGGCGTT--TGCT-TTAAATACATTAGCATGGAATAATAAGATATGAC---TTGTGTGGTC--TATTTTGTTGGTTTGCACACGC-AAG-TAATGATTAATAGGGACAGTTGGGGGTATTCATATTTCAGTGTCAGAGGTGAAATTCTTGGATCGCTGAAAGATGAGCTTAGGCGAAAGCATTTACCATGGATGTTTTCATTAATCAAGAACGAAAGTTAGGGGATCGAAGATGATTAGATACCATCGTAGTCTTAACCATAAACTATGCCGACTCGGGATTGGCAGTCGTTA-----ATGA--CCTTGTCAGCACCGTATGAGAAATCAAAGTCTTTGGGTTCCGGGGAGAGTATGATCGC-AGGTT------------------------------------------------------------------------------------------------------------------------------------------------------------------------------------------------------------------------------------------------------------------------------------------------------------------------------------------------------------------------------------------------------------------------------------------------------------------------------------------------------------------------------------------------------------------------------------------------------------------------------------------------
>Uncultured_eukaryote_clone_D3P05B11
---TAGCATTTATTAGATTGAAACCAAT-C--CTTTA--GGTATTGA-GTTGAGTCATAATAACTGTGCG----G-AT----------CGGCGATGAATCAAATGGGATTCTGCCCTATCAGCTTTGGTTGGGTGTGTATTGGACACCCATGGCATTGACGGGT-ACGGGGAATTAGGGTTTGATTCCGGAGAGGGAGCCTGAGAAACGGCTACCACATCCAAGGAAGGCAGCAGGCGCGTAAATTACCCAATCCTGACACAGGGAGGTAGTGACAATAAATAACAATGCCGGGCT-----AAGTCTGGCAATTGGAATGAGAACAATTTAAATCCCTTAACGAGGATCAATTGAAGGGCAAGTCTGGTGCCAGCAGCCGCGGTAATTCCAGCTTCAATAGCGTATATCTAAGTTGTTGCAGTTAAAAAGCTCGTAGTTGGATA-T--CTGT-GTTGG-----AT--ATTGG----GTC---------------ACT----------------CAT-ATA-TTAGGC--T---C-----CTGGCATTAA----------GT---------TG---------------TCGTTTACTGTGAAAAAATTAGAGTGTTTCAAGCAGGCGTT--TGCT-TTAAATACATTAGCATGGAATAATAAGATATGAC---TTGTGTGGTC--TATTTTGTTGGTTTGCACACGC-AAG-TAATGATTAATAGGGACAGTTGGGGGTATTCATATTTCAGTGTCAGAGGTGAAATTCTTGGATCGCTGAAAGATGAGCTTAGGCGAAAGCATTTACCATGGATGTTTTCATTAATCAAGAACGAAAGTTAGGGGATCGAAGATGCTTAGATACCATCGTAGTCTTAACCATAAACTATGCCGACTCGGGATTGGCAGTCGTTA-----ATGA--CCTTGTCAGCACCGTATGAGAAATCAAAGTCTTTGGGTTCCGGGGAGAGTATGATCGC-AGGTT------------------------------------------------------------------------------------------------------------------------------------------------------------------------------------------------------------------------------------------------------------------------------------------------------------------------------------------------------------------------------------------------------------------------------------------------------------------------------------------------------------------------------------------------------------------------------------------------------------------------------------------------
>Uncultured_eukaryote_clone_D3P06D06
---TAGCATTTATTAGATTGAAACCAAT-C--CTTTA--GGTATTGA-GTTGAGTCATAATAATTGTGCG----G-AT----------CGGCGATGAATCAAATGGGATTCTGCCCTATCAGCTTTGGTTGGGTGTGTATTGGACACCCAAGGCATTCACGGGT-ACGGGGAATCAGGGTTTGATTCCGGAGAGGGAGCCTGAGAAACGGCTACCACATCCAAGGAAGGCAGCAGGCGCGTAAATTACCCAATCCTGACACAGGGAGGTAGTGACAATAAATAACAATGCCGGGCT-----AAGTCTGGCAATTGGAATGAGAACAATTTAAATCCCTTAACGAGGATCAATTGAAGGGCAAGTCTGGTGCCAGCAGCCGCGGTAATTCCAGCTTCAATAGCGTATATCTAAGTTGTTGCAGTTAAAAAGCTCGTAGTTGGATA-T--CTGT-GTTGG-----AT--ATTGG----GTC---------------ACT----------------CAT-ATA-TTAGGC--T---C-----CTGGCATTAA----------GT---------TG---------------TCGTTTACTGTGAAAAAATTAGAGTGTTTCAAGCAGGTGTT--TGCT-TTAAATACATTAGCATGGAATAATAAGATATGAC---TTGTGTGGTC--TATTTTGTTGGTTTGCACACGC-AAG-TAATGATTAATAGGGACAGTTGGGGGTATTCATATTTCAGTGTCAGAGGTGAAATTCTTGGATCGCTGAAAGATGAGCTTAGGCGAAAGCATTTACCATGGATGTTTTCATTAATCAAGAACGAAAGTTAGGGGATCGAAGATGATTAGATACCATCGTAGTCTTAACCATAAACTATGCCGACTCGGGATTGGCAGTCGTTA-----ATGA--CCTTGTCAGCACCGTATGAGAAATCAAAGTCTTTGGGTTCCGGGGAGAGTATGATCGC-AGGTT------------------------------------------------------------------------------------------------------------------------------------------------------------------------------------------------------------------------------------------------------------------------------------------------------------------------------------------------------------------------------------------------------------------------------------------------------------------------------------------------------------------------------------------------------------------------------------------------------------------------------------------------
>P.cf._pseudodelicatissima_parasite
---TTGCATTTATTAGATTGAAACCAAT----CTTTGG-GGTATTGT-GTTGAGTCATAATAACTAATCG----G-AT----------CGGCGATGAATCAATTGGGATTCTGCCCTATCAGCTTTGGATGGTAGGATATGGGCCTACCATGGCATTAACGGGTAACGGGGAATTAGGGTTTGATTCCGGAGAGGGAGCCTGAGAAACGGCTACCACATCCAAGGAAGGCAGCAGGCGCGTAAATTACCCAATCCTGACACAGGGAGGTAGTGACAATAAATAACAATGCCGGGCT-----AAGTCTGGCAATTGGAATGAGAACAATTTAAATCCCTTAACGAGGATCAATTGGAGGGCAAGTCTGGTGCCAGCAGCCGCGGTAATTCCAGCTCCAATAGCGTATATTAAAGTTGTTGCAGTTAAAAAGCTCGTAGTTGGATT-T--CTGT-TTTGA-----AT--GTCCG----GTC---------------ACT-----TT---G-----CAT--T-TTTAGGG--T---C----TATGGCATTAA----------TT---------TA---------------TCGTTTACTGTGAAAAAATTAGAGTGTTTCAAGCAGGCGT----GC--TTGAATACATTAGCATGGAATAATAAGATACGAC---TAGCGTGGTC--TATTTTGTTGGTTTGCACACGC-AAG-TAATGATTAATAGGGACAGTTGGGGGTATTCATATTTGAGCGTCAGAGGTGAAATTCTTGGATCGCTGAAAGATGAGCTTAGGCGAAAGCATTTATCATGGATGTTTTCATTAATCAAGAACGAAAGTTAGGGGATCGAAGATGATTAGATACCATCGTAGTCTTAACCATAAACTATGCCGACTCGGGATTGGCAGTCGTTA-----ATGA--CTTTGTCAGCACCGTATGAGAAATCAAAGTCTTTGGGTTCCGGGGGTAGTATGATCGCAAGGTT------------------------------------------------------------------------------------------------------------------------------------------------------------------------------------------------------------------------------------------------------------------------------------------------------------------------------------------------------------------------------------------------------------------------------------------------------------------------------------------------------------------------------------------------------------------------------------------------------------------------------------------------
>Uncultured_marine_eukaryote_clone_BL010320.2
---TTGCATTTATTAGATTGAAACCAAT----CTTCGG-GGTATTGT-GTTGAGTCATAATAACTAATCG----G-AT----------CGGCGATGAATCAATTGGGATTCTGCCCTATCAGCTTTGGATGGTAGGATATGGGCCTACCATGGCATTAACGGGTAACGGGGAATTAGGGTTTGATTCCGGAGAGGGAGCCTGAGAAACGGCTACCACATCCAAGGAAGGCAGCAGGCGCGTAAATTACCCAATCCTGACACAGGGAGGTAGTGACAATAAATAACAATGCCGGGCT-----AAGTCTGGCAATTGGAATGAGAACAATTTAAATCCCTTATCGAGGATCAATTGGAGGGCAAGTCTGGTGCCAGCAGCCGCGGTAATTCCAGCTCCAATAGCGTATATTAAAGTTGTTGCAGTTAAAAAGCTCGTAGTTGGATT-T--CTGT-TTTGA-----AT--GTCCG----GTC---------------ACT-----TT---G-----CAT--T-TTTAGGG--T---C----TTTGGCATTAA----------GT---------TG---------------TCGTTTACTGTGAAAAAATTAGAGTGTTTCAAGCAGGCGT----GC--TTGAATACATTAGCATGGAATAATAAGATACGAC---TAGCGTGGTC--TATTTTGTTGGTTTGCACACGC-AAG-TAATGATTAATAGGGACAGTTGGGGGTATTCATATTTGAGCGTCAGAGGTGAAATTCTTGGATCGCTGAAAGATGAGCTTAGGCGAAAGCATTTATCATGGATGTTTTCATTAATCAAGAACGAAAGTTAGGGGATCGAAGATGATTAGATACCATCGTAGTCTTAACCATAAACTATGCCGACTCGGGATTGGCAGTCGTTA-----ATGA--CCTTGTCAGCACCGTATGAGAAATCAAAGTCTTTGGGTTCCGGGGGTAGTATGATCGCAAGGTT------------------------------------------------------------------------------------------------------------------------------------------------------------------------------------------------------------------------------------------------------------------------------------------------------------------------------------------------------------------------------------------------------------------------------------------------------------------------------------------------------------------------------------------------------------------------------------------------------------------------------------------------
>Uncultured_stramenopile_clone_H3S3Be44w
---TTGCATTTATTAGACTGAAACCAAT----CTTTGG-GGTATTGT-GTTGAGTCATAATAACTAATCG----G-AT----------CGGCGATGGATCAATTGGGATTCTGCCCTATCAGCTTTGGATGGTAGGATATGGGCCTACCATGGCATTAACGGGTAACGGGGAATTAGGGTTTGATTCCGGAGAGGGAGCCTGAGAAACGGCTACCACATCCAAGGAAGGCAGCAGGCGCGTAAATTACCCAATCCTGACACAGGGAGGTAGTGACAATAAATAACAATGCCGGGCT-----AAGTCTGGCAATTGGAATGAGAACAATTTAAATCCCTTAACGAGGATCAATTGGAGGGCAAGTCTGGTGCCAGCAGCCGCGGTAATCCCAGCTCCAATAGCGTATATTAAAGTTGTTGCAGTTAAAAAGCTCGTAGTTGGGTT-T--CTGT-TTTGA-----AT--GTCCG----GTC---------------ACT-----TT---G-----CAT--T-TTTAGGG--T---C----TATGGCATTAA----------TT---------TA---------------TCGTTTACTGTGAAAAAATTAGAGTGTTTCAAGCAGGCGT----GC--TTGAATACATTAGCATGGAATAATAAGATACGAC---TAGCGTGGTC--TATTTTGTTGGTTTGCACACGC-AAG-TAATGATTAATAGGGACAGTTGGGGGTATTCATACTTGAGCGTCAGAGGTGAAATTCTTGGATCGCTGAAAGATGAGCTTAGGCGAAAGCATTTATCATGGATGTTTTCATTAATCAAGAACGAAAGTTAGGGGATCGAAGATGATTAGATACCATCGTAGTCTTAACCATAAACTATGCCGACTCGGGATTGGCAGTCGTTA-----ATGA--CTTTGTCAGCACCGTATGAGAAATCAAAGTCTTTGGGTTCCGGGGGTAGTATGATCGCAAGGTT------------------------------------------------------------------------------------------------------------------------------------------------------------------------------------------------------------------------------------------------------------------------------------------------------------------------------------------------------------------------------------------------------------------------------------------------------------------------------------------------------------------------------------------------------------------------------------------------------------------------------------------------
>Lagenisma_coscinodisci
---TAGCATTTATTAGATTGAAACCAAT-G--CTTCGG-GGTATTGT-GTTGAGTCATAATAACTGTGCG----G-AT----------CGGCGATAAATCGATTGAGTTTCTGCCCTATCAGCTTTGGATGGTAGGATATGGGCCTACCATGGCGTTAACGGGTAACGGGGAATTAGGGTTTGATTCCGGAGAGGGAGCCTTAGAAACGGCTACCACATCCAAGGAAGGCAGCAGGCGCGTAAATTACCCAATCCTGACACAGGGAGGTAGTGACAATAAATAACAATGCCGGGCT-----AAGTCTGGCAATTGGAATGAGAACAATTTAAATCCCTTAACGAGGATCAATTGGAGGGCAAGTCTGGTGCCAGCAGCCGCGGTAATTCCAGCTCCAATAGCGTATATTAAAGTTGTTGCAGTTAAAAAGCTCGTAGTTGGATT-T--CTGG-TTTGA-----GC--GTCCG----GTC---------------AC------TG---C-----CA---T-TTTAGGA--T---G----CCTGCCATTAA----------GT---------TG---------------TCGTTTACTGTGAAAAAATTAGAGTGTTTAAAGCAGGCGTT--TGCT-TTGAATACATTAGCATGGAATAATAAGATACGAC---TTTGGTGGTC--TATTTTGTTGGTTTGCACGCCA-GAG-TAATGATTAATAGGGACAGTTGGGGGTATTCATATTTCAGCGTCAGAGGTGAAATTCTTGGATCGCTGAAAGATGAGCTTAGGCGAAAGCATTTACCAAGGATGTTTTCATTAATCAAGAACGAAAGTTAGGGGATCGAAGATGATTAGATACCATCGTAGTCTTAACCATAAACTATGCCGACTCGGGATTGGCAGTCGTTA-----ATGA--CCTTGTCAGCACCGTATGAGAAATCAAAGTCTTTGGGTTCCGGGGGGAGTATGGTCGC-AGGCT------------------------------------------------------------------------------------------------------------------------------------------------------------------------------------------------------------------------------------------------------------------------------------------------------------------------------------------------------------------------------------------------------------------------------------------------------------------------------------------------------------------------------------------------------------------------------------------------------------------------------------------------
>Olpidiopsis_porphyrae
---TTGCATTTATTAGATTGAAACCAAT-C--TTT--G-GGTATTGA-GTTGAGTCATAATAACTGTGCG----G-AT----------CGGCGATGAATCAATTGAGTTTCTGCCCTATCAGCTTTGGATGGTAGGATATGGGCCTACCATGGCATTAACGGGTAACGGGGAATTAGGGTTTGATTCCGGAGAGGGGGCCTGAGAAACGGCCACCACATCCAAGGAAGGCAGCAGGCGCGTAAATTACCCAATTCTGACACAGAGAGGTAGTGACAATAAATAACAATGCCGGGCT-----AAGTCTGGCAATTGGAATGAGAACAATTTAAATCCCTTAACGAGGATCAATTGGAGGGCAAGTCTGGTGCCAGCAGCCGCGGTAATTCCAGCTCCAATAGCGTATATTAAAGTTGTTGCAGTTAAAAAGCTCGTAGTTGGATT-T--CTGT-CTTGA-----AT--TTCCG----GTC---------------ACTT----GT---T-----CAT--T-TTTAGAC--T---G----TTTGACATTAA----------GT---------TG---------------TCGTTTACTGTGAAAAAATTAGAGTGTTTAAAGCAGGCGTT--CGC--TTGAATACATTAGCATGGAATAATAAAATATGAC---TTTGGTGGTC--TATTTTGTTGGTTTGCACACCA-GAG-TAATGATTAATAGGGACAGTTGGGGGTATTCATATTTCAGCGTCAGAGGTGAAATTCTTGGATCGCTGAAAGATGAGCTTAGGCGAAAGCATTTATCATGGATGTTTTCATTAATCAAGAACGAAAGTTAGGGGATCGAAGATGATTAGATACCATCGTAGTCTTAACCATAAACTATGCCGACTCGGGATTGGCAGTCGTTA-----ATGA--CCTTGTCAGCACCGTATGAGAAATCAAAGTCTTTGGGTTCCGGGGGGAGTATGGTCGCAAGGCT------------------------------------------------------------------------------------------------------------------------------------------------------------------------------------------------------------------------------------------------------------------------------------------------------------------------------------------------------------------------------------------------------------------------------------------------------------------------------------------------------------------------------------------------------------------------------------------------------------------------------------------------
>Olpidiopsis_pyropiae
---TAGCATTTATTAGATTGAAACCAAT-A--CTT--G-GTTTTTGA-GTTGAGTCATAATAACTGTGCG----G-AT----------CGACGATAAATCAATTGAGTTTCTGCCCTATCAGCTTTGGATGGTAGGATATGGGCCTACCATGGCATTAACGGGTAACGGGGAATTAGGGTTTGATTCCGGAGAGGGAGCCTTAGAAACGGCTACCACATCCAAGGAAGGCAGCAGGCGCGTAAATTACCCAATCTTGACACAAGGAGGTAGTGACAATAAATAACAAAGCCGGGCT-----AAGTCTGGCTATTGGAATGAGAACAATTTAAATCCCTTAACGAGGATCAATTGGAGGGCAAGTCTGGTGCCAGCAGCCGCGGTAATTCCAGCTCCAATAGCGTATATTAAAGTTGTTGCAGTTAAAAAGCTCGTAGTTGGATT-T--CTGT-TTTGG-----GT--ATCCG----GTC---------------ACTA----TA---G-----CAT--G-TTTAGTT--T---G----TGTGGTATTCA----------TT---------TA---------------TCGTTTACTGTGAATAAATTAGAGTGTTTAAAGCAGGCGTT--TGCA-TTGAATACATTAGCATGGAATAATAAGATACGAC---TCAGGTGGTC--TATTTTGTTGGTTTGCACACCA-GAG-TAATGATTAATAGGGACAGTTGGGGGTATTCATATTTCAGCGTCAGAGGTGAAATTCTTAGATCGCTGAAAGATGAGCTTAGGCGAAAGCATTTACCATGAATGTTTTCATTAATCAAGAACGAAAGTTAGGGGATCGAAGATGATTAGATACCATCGTAGTCTTAACCATAAACTATGCCGACTCGGGATTGGCAGTCGTTA-----ATGA--CCTTGTCAGCACCGTATGAGAAATCAAAGTCTTTGGGTTCCGGGGGGAGTATGGTCGCAAGGCT------------------------------------------------------------------------------------------------------------------------------------------------------------------------------------------------------------------------------------------------------------------------------------------------------------------------------------------------------------------------------------------------------------------------------------------------------------------------------------------------------------------------------------------------------------------------------------------------------------------------------------------------
>Olpidiopsis_polysiphoniae
---TAGCATTTATTAGATTTAAACCTTC-T--CTT--G-GAAGTTGT-GTTGAGTCATAATAACTGTGCG----G-AT----------CGGCGATGAATCAATTGAGTTTCTGCCCTATCAGCTTTGGATGGTAGGATATGGGCCTACCATGGCATTAACGGGTAACGGGGAATTAGGGTTTGATTCCGGAGAGGGAGCCTTAGAAACGGCTACCACATCCAAGGAAGGCAGCAGGCGCGTAAATTACCCAATCCTGACACAGGGAGGTAGTGACAATAAATAACAATGCCGGGCT-----AAGTCTAGCAATTGGAATGAGAACAATTTAAATCCCTTAACGAGGATCAATTGGAGGGCAAGTCTGGTGCCAGCAGCCGCGGTAATTCCAGCTCCAATAGCGTATATTAAAGTTGTTGCAGTTAAAAAGCTCGTAGTTGGATT-T--CTGT-TTTTA-----GT--TACCG----GTC---------------ACTA----TT---T-----CAT--T-TTTAGGA--T---C----CTTGGCATTAA----------GT---------TG---------------TCTTTTACTGTGAAAAAATTAGAGTGTTTAAAGCAGGCGTT--CGCT-TTGAATACATTAGCATGGAATAATAAGATACGAC---TTGTGTGGTC--TATTTTGTTGGTTTGCACACGC-GAG-TAATGATTAATAGGGACAGTTGGGGGTATTCATATTTCAGCGTCAGAGGTGAAATTCTTGGATCGCTGAAAGATGAGCTTAGGCGAAAGCATTTACCATGGATGTTTTCATTAATCAAGAACGAAAGTTAGGGGATCGAAGATGATTAGATACCATCGTAGTCTTAACCATAAACTATGCCGACTCGAGATTGGCAGTCGTTA-----ATGA--CCTTGTCAGCATCGTATGAGAAATCAAAGTCTTTGGGTTCCGGGGGGAGTATGGTCGCAAGGCT------------------------------------------------------------------------------------------------------------------------------------------------------------------------------------------------------------------------------------------------------------------------------------------------------------------------------------------------------------------------------------------------------------------------------------------------------------------------------------------------------------------------------------------------------------------------------------------------------------------------------------------------
>Olpidiopsis_bostrychiae
---TAGCATTTATTAGATTGAAACCTTC-T--CTT--G-GAAGTTGT-GTTGAGTCATAATAACTGTGCG----G-AT----------CGGCGATGAATCAATTGAGTTTCTGCCCTATCAGCTTTGGATGGTAGGATATGGGCCTACCATGGCATTAACGGGTAACGGGGAATTAGGGTTTGATTCCGGAGAGGGAGCCTTAGAAACGGCTACCACATCCAAGGAAGGCAGCAGGCGCGTAAATTACCCAATCCTGACACAGGGAGGTAGTGACAATAAATAACAATGCCGGGCT-----AAGTCTGGCAATTGGAATGAGAACAATTTAAATCCCTTAACGAGGATCAATTGGAGGGCAAGTCTGGTGCCAGCAGCCGCGGTAATTCCAGCTCCAATAGCGTATATTAAAGTTGTTGCAGTTAAAAAGCTCGTAGTTGGATG-T--CTGT-TTTTA-----GT--TACCG----GTC---------------ACTT----GT---T-----CAT--T-TTTAGGA--T---C----CTTGGCATTAA----------GT---------TG---------------TCTTTTACTGTGAAAAAATTAGAGTGTTTAAAGCAGGCGTT--CGCT-TTGAATACATTAGCATGGAATAATAAGATATGAC---TTGTGTGGTC--TATTTTGTTGGTTTGCACACGC-GAG-TAATGATTAATAGGGACAGTTGGGGGTATTCATATTTCAGCGTCAGAGGTGAAATTCTTGGATCGCTGAAAGATGAGCTTAGGCGAAAGCATTTACCATGGATGTTTTCATTAATCAAGAACGAAAGTTAGGGGATCGAAGATGATTAGATACCATCGTAGTCTTAACCATAAACTATGCCGACTCGGGATTAGCAGTCGTTT-----ATGA--CTCTGTTAGCACCGTATGAGAAATCAAAGTCTTTGGGTTCCGGGGGGAGTATGGTCGCAAGGCT------------------------------------------------------------------------------------------------------------------------------------------------------------------------------------------------------------------------------------------------------------------------------------------------------------------------------------------------------------------------------------------------------------------------------------------------------------------------------------------------------------------------------------------------------------------------------------------------------------------------------------------------
>Pirsonia_punctigera
---ATGTCTTTATTAGATCGAAACCAAT-G--CCAACC-GGTATTGT-GGTGATTCATAATAACTGTGCG----A-AT----------CGGCGATAAATC-ATTAAGTTTCTGCCCTATCAGCTTTCGATGGTAGGGTATTGGCCTACCATGGCGTTAACGGGTAACGGAGAATTAGGGTTCGATTCCGGAGAGGGAGCCTGAGAAACGGCTACCACATCCAAGGAAGGCAGCAGGCGCGTAAATTACCCAATCCTGACACAGGGAGGTAGTGACAATAAATAACAATGTTGGGCT-----AAGTTTGACAATTGGAATGAGAACAATTTAAATCCCTTAACGAGGATCAATTGGAGGGCAAGTCTGGTGCCAGCAGCCGCGGTAATTCCAGCTCCAATAGCGTATATT-AAGTTGTTGCAGTT-AAAAGCTCGTAGTTGGATT-T--CTGG-T-TGA-----CC--GGTCT----G-C---------------ACTA----GG---C-----CAT--C-CTTA-AC--T---A----ACTGGCATTAG----------GT---------TG---------------TCCTTTACTGTGAAAAAATTAGAGTGTTTAAAGCAGGCTTG---GCC-TTGAATACATTAGCATGGAATAATAAGATAGGAC---TTTGGTGGC---TATTTTGTTGGTTTGCACACCA-AGG-TAATGATTAATAGGGACAGTTGGGGGTATCCGTATTTC-GAGTCAGAGGTGAAATTCTTGGATTTACGAAAGACGAACTACTGCGAAAGCATTTACCAAGGATGTTTTCATTAATCAAGAACGAAAGTTAGGGGATCGAAGATGATTAGATACCATCGTAGTCTTAACCATAAACTATGCCGACTAGGGATTGGCGGTCGTTT-----ATGA--CTCCGCCAGCACCTTATGAGAAATCAAAGTCTTTGGGTTCCGGGGGGAGTATGGTCGCAAGGCT------------------------------------------------------------------------------------------------------------------------------------------------------------------------------------------------------------------------------------------------------------------------------------------------------------------------------------------------------------------------------------------------------------------------------------------------------------------------------------------------------------------------------------------------------------------------------------------------------------------------------------------------
>Pirsonia_verrucosa
---TTGTGTTTATTAGATACAGAACTAA-C--CTCCGC-GGTCTTTT-GGTGATTCATAATAACCGAACG----G-AT----------CGGCGATGAATC-ATTAAGTTTCTGACCTATCAGCTTCCGACGGTAGGGTATTGGCCTACCGTGGCAATGACGGGTAACGGAGAATTAGGGTTCGATTCCGGAGAGGGAGCCTTAAAAACGGCTACCACATCTAAGGAAGGCAGCAGGCGCGCAAATTACCCAATCCTGATACAGGGAGGTAGTGACAAGAAATAACAATGCGGAGCG-----GCGTTTTGCAATTGGAATGAGTACAATTTAAATCCCTTAACGAGGATCAATTGGAGGGCAAGTCTGGTGCCAGCAGCCGCGGTAATTCCAGCTCCAATAGCGTATATTAAAGTTGTTGCAGTTAAAAAGCTCGTAGTTGGATT-T--CTGG-T-CGA-----CC--GGTCG----G-C---------------ACTG----GG---C-----CAT--C-CTTA-AC--G---T----GTTGGCATTAA----------GT---------TG---------------TCGTTTACTGTGAAAAAATTAGAGTGTTTAAAGCACGCAT---TGCT--TGAATACATTAGCATGGAATAATAAGATAGGAC---TTTGGTG-C---TATTTTGTTGGTTTGCGTACCA-AGG-TAATGATTAATAGGGATAGTTGGGGGTATTCGTAT-TCAAT-------GTGAAATTCTTGGATTTATGGGAAGACGACAACTGCGAAAGCATTTACCAAGGATGATTT-----------AAC-------AGG-----GYAGATGATTAGATACCATCGTAGTCTTAACCATAAACTATGCCGACTAGGGATTGGGCGTCGATA-----ATGT--CATGCTCAGCACCTTATGAGAAATCAAAGTCTTTGGGTTCCGGGGGGAGTATGGTCGCAAGGCT------------------------------------------------------------------------------------------------------------------------------------------------------------------------------------------------------------------------------------------------------------------------------------------------------------------------------------------------------------------------------------------------------------------------------------------------------------------------------------------------------------------------------------------------------------------------------------------------------------------------------------------------
>Rhizidiomyces_apophysatus
---ATGTATTTATTAGATTGAAACCAAT-G--CCAACC-GGTATTGT-GGTGAGTCATAATAACTGTGCG----G-AT----------CGGCGACAAATC-ATTAAGTTTCTGCCCTATCAGCTTTGGATGGTAGGGTATTGGCCTACCATGGCATTAACGGGTAACGGAGAATTAGGGTTCGATTCCGGAGAGGGAGCCTGAGAGACGGCTACCACATCCAAGGAAGGCAGCAGGCGCGTAAATTACCCAATCCTGACACAGGGAGGTAGTGACGATAAATAACAATGCCGGGC------AAGTCTGGCAATTGGAATGAGAACAATTTAAATCCCTTAACGAGGATCAATTGGAGGGCAAGTCTGGTGCCAGCAGCCGCGGTAATTCCAGCTCCAATAGCGTATATTAAAGTTGTTGCAGTTAAAAAGCTCGTAGTTGGATT-T--CTGG-CTGGA-----GT--GATCG----GTC---------------ACTT----GG---C-----CAT--C-CTTA-AC--T---G----TTTGGCATTGA----------GT---------TG---------------TCTTTTACTGTGAAAAAATTAGAGTGTTTAAAGCACGT-TA--CGCC-TTGAATACATTAGCATGGAATAATAAGATAGGAC---TTTGGTGGTT--TATTTTGTTGGTTTGTACACCA-AGG-TAATGATTAATAGGGATAGTTGGGGGTATTCGTATTTCAATGTCAGAGGTGAAATTCTTGGATTTCTGAAAGACGAACTACTGCGAAAGCATTTACCAAGGATGTTTTCATTAATCAAGAACGAAAGTTAGGGGATCGAAGATGATTAGATACCATCGTAGTCTTAACCATAAACTATGCCGACTCGGGATTGGCGGGCGTTT-----ATGA--CTCCGTCAGCACCGTATGAGAAATCAAAGTCTTTGGGTTCCGGGGGGAGTATGGTCGCAAGGCT------------------------------------------------------------------------------------------------------------------------------------------------------------------------------------------------------------------------------------------------------------------------------------------------------------------------------------------------------------------------------------------------------------------------------------------------------------------------------------------------------------------------------------------------------------------------------------------------------------------------------------------------
>Hyphochytrium_catenoides
---ATGTATTTATTAGATTGAAACCAAT-G--CCAACC-GGTATTGT-GGTGAGTCATAATAACTGTGCG----G-AT----------CGGCGACAAATC-ATTAAGTTTCTGCCCTATCAGCTTTGGATGGTAGGGTATTGGCCTACCATGGCATTAACGGGTAACGGAGAATTAGGGTTCGATTCCGGAGAGGGAGCCTGAGAGACGGCTACCACATCCAAGGAAGGCAGCAGGCGCGTAAATTACCCAATCCTGACACAGGGAGGTAGTGACAATAAATAACAATGCCGGGCT-----AAGTCTGGCAATTGGAATGAGTACAATTTAAATCCCTTAACGAGGATCAATTGGAGGGCAAGTCTGGTGCCAGCAGCCGCGGTAATTCCAGCTCCAATAGCGTATATTAAAGTTGTTGCAGTTAAAAAGCTCGTAGTTGGATT-T--CTGG-CCGGA-----GC--GATCG----GTC---------------ACTT----GG---C-----CAT--C-CTTA-AC--T---G----TTTGGCATTGA----------GT---------TG---------------TCGTTTACTGTGAAAAAATTAGAGTGTTTAAAGCACGT-TA--CGCC-TTGAATACATTAGCATGGAATAATAAGATAGGGC---ATTGGTGGTC--TATTTTGTTGGTTTGCACACTT-ATG-CAATGATTAATAGGGATAGTTGGGGGTATTCGTATTTCAATGTCAGAGGTGAAATTCTTGGATTTCTGAAAGACGAACTACTGCGAAAGCATTTACCAAGGATGTTTTCATTAATCAAGAACGAAAGTTAGGGGATCGAAGATGATTAGATACCATCGTAGTCTTAACCATAAACTATGCCGACTCGGGATTGGCGGGCGTTG-----ATGA--CTCCGTCAGCACCGTATGAGAAATCAAAGTCTTTGGGTTCCGGGGGGAGTATGGTCGCAAGGCT------------------------------------------------------------------------------------------------------------------------------------------------------------------------------------------------------------------------------------------------------------------------------------------------------------------------------------------------------------------------------------------------------------------------------------------------------------------------------------------------------------------------------------------------------------------------------------------------------------------------------------------------
>Developayella_elegans
---GTGTATTTATTAGATCAAAACCAAT-G--CTCGCC-GGTATTGT-GGTGAGTCATAATAACTGT-CT----G-AT----------CGGCGATATGTC-ATTAAGTTTCTGCCCTATCAGC-TAGGATGGTAGGGTATTGGCCTACCATGGCGTTAACGGGTAACGGAGAATTGGGGTTCGATTCCGGAGAGGGAGCCTGAGAGACGGCTACCACATCCAAGGAAGGCAGCAGGCGCGTAAATTACCCAATCCCAATTCGGGGAGATAGTGACAATAAATAACAATGGCGGGCA-----ATGTCTGCCAATTGGAATGAGAACAATTTAAATCCCTTAACGAGGATCAATTGGAGGGCAAGTCTGGTGCCAGCAGCCGCGGTAATTCCAGCTCCAATAGCGTATATTAAAGTTGTTGCAGTTAAAAAGCTCGTAGTTGGATT-T--CTGG-TTGGA-----GA--GCTCG----GTC---------------ACCA----GG---C-----CAT--C-CTTA--C--G---C----AGTGGTC-TTA----------GT---------TG---------------TCGTTTACTGTGAAAAAATTAGAGTGTTTAAAGCAGGCTTA--TGCC-CTGAATACATTAGCATGGAATAATAAGATAGGAC---TTTGGT--AC--TATTTTGTTGGTTTGCATACCA-AGG-TAATGATTAATAGGGATAGTTGGGGGTATTCATATTT-AATGTCAGAGGTGAAATTCTTGGATTTATGAAAGATGAACTTATGCGAAAGCATTTACCAAGGATGTTTTCATTAATCAAGAACGAAAGTTAGGGGATCGAAGATGATTAGATACCATCGTAGTCTTAACCATAAACTATGCCGACTAGGGATCAGCAGGTGTCT-----YTGA--CCCTGTTGGCACCTTATGAGAAATCAAAGTCTTTGGGTTCCGGGGGGAGTATGGTCGCAAGGCT------------------------------------------------------------------------------------------------------------------------------------------------------------------------------------------------------------------------------------------------------------------------------------------------------------------------------------------------------------------------------------------------------------------------------------------------------------------------------------------------------------------------------------------------------------------------------------------------------------------------------------------------
>Eukaryote_marine_clone_ME1-17_clone_ME1-17
---T-GTATTTATTAGATCGAAACCAAT-G--CTTCGG-GGTATTTT-GGTGAGTCATAATAACTGTGCG----G-AT----------CGACGATGAATC-ATTAAGTTTCTGCCCTATCAG-TTTCGATGGTAGGGTATTGGCCTACCATGGCGTTAACGGGTAACGGAGAATTAGGGTTCGATTCCGGAGAGGGAGCCTGAGAGACGGCTACCACATCCAAGGAAGGCAGCAGGCGCGTAAATTACCCAATCCTGACTCAGGGAGGTAGTGACAATAAATAACGATGCCGGGCT------AGTCTGGCAATTG-AATGAGAACAATCTAAAACCCTTAACGAGGATCAATTGGAGGGCAAGTCTGGTGCCAGCAGCCGCGGTAATTCCAGCTCCAATGGCGTATATTAAAGTTGTTGCAGTTAAAAAGCTCGTAGTTGGATT-T--CTGG-C--GA-----GC--GACCG----GTC---------------ACTA-----G---C-----CAT--A-TTTAG-A--G---C----GTTGGCATTAA----------GT---------TG---------------TCGTTTACTGTGAGAAAATTAGAGTGTTCAAAGCAGGC-TT---GC--TTGGATATGTTAGCATGGAATAATAAGATAAGAC---TTTGGCGGTC--TATTTTGTTGGTTTGCACGCCA-TTG-TAATGATTGATAGGGACAGTTGGGGGTATTCATATTT-AATGTCAGAGGTGAAATTCTTGGATTTATGAAAGATGAACTACTGCGAAAGCATTTACCAAGGATGTTTTCATTAATCAAGAACGAAAGTTAGGGGATCGAAGATGATTAGATACCATCGTAGTCTTAACCATAAACTATGCCGACTAGGGATTGGCGGTCGTT------ATGA--CTCCGTCAGCACCTTATGAGAAATCAAAGTCTTTGGGTTCCGGGGGGAGTATGGTCGCAAGGCT------------------------------------------------------------------------------------------------------------------------------------------------------------------------------------------------------------------------------------------------------------------------------------------------------------------------------------------------------------------------------------------------------------------------------------------------------------------------------------------------------------------------------------------------------------------------------------------------------------------------------------------------
>Uncultured_marine_stramenopile_DH148-5-EKD53
---T-GTATTTATTAGATCGAAACCAAT-G--CTTCGG-GGTATTTT-GGTGAGTCATAATAACTGTGCG----G-AT----------CGACGATGAATC-ATTAAGTTTCTGCCCTATCAG-TTTCGATGGTAGGGTATTGGCCTACCATGGCGTTAACGGGTAACGGAGAATTAGGGTTCGATTCCGGAGAGGGAGCCTGAGAGACGGCTACCACATCCAAGGAAGGCAGCAGGCGCGTAAATTACCCAATCCTGACTCAGGGAGGTAGTGACAATAAATAACGATGCCGGGCT------AGTCTGGCAATTG-AATGAGAACAATCTAAAACCCTTAACGAGGATCAATTGGAGGGCAAGTCTGGTGCCAGCAGCCGCGGTAATTCCAGCTCCAATGGCGTATATTAAAGTTGTTGCAGTTAAAAAGCTCGTAGTTGGATT-T--CTGG-C--GA-----GC--GACCG----GTC---------------ACTA-----G---C-----CAT--A-TTTAG-A--G---C----GTTGGCATTAA-----------T---------TT---------------TCGTTTACTGTGAGAAAATTAGAGTGTTCAAAGCAGGC-TT---GC--TTGGATATGTTAGCATGGAATAATAAGATAAGAC---TTTGGCGGTC--TATTTTGTTGGTTTGCACGCCA-TTG-TAATGATTGATAGGGACAGTTGGGGGTATTCATATTT-AATGTCAGAGGTGAAATTCTTGGATTTATGAAAGATGAACTACTGCGAAAGCATTTACCAGGGATGTTTTCATTAATCAAGAACGAAAGTTAGGGGATCGAAGATGATTAGATACCATCGTAGTCTTAACCATAAACTATGCCGACTAGGGATTAGCGGTCGTT------ATGA--CTCCGTTAGCACCTTATGAGAAATCAAAGTCTTTGGGTTCCGGGGGGAGTATGGTCGCAAGGCT------------------------------------------------------------------------------------------------------------------------------------------------------------------------------------------------------------------------------------------------------------------------------------------------------------------------------------------------------------------------------------------------------------------------------------------------------------------------------------------------------------------------------------------------------------------------------------------------------------------------------------------------
>Haptoglossa_zoospora
---TAGCATTTATTAGATTGAAACCAAT-G--CTTCGG-GGTATTGA-GTTGAATCATAATAACTGTGCG----G-AT----------CGGCGATAGATCATTTAAGTTTCTGCCCTATCAGCTTTGGATGGTAGGGTATTGGCCTACCATGGCGGTAACGGGTAACGGGGAATTAGGGTTCGATTCCGGAGAGGGAGCCTGAGAAACGGCTACCACATCCAAGGAAGGCAGCAGGCGCGTAAATTACCCAATCCTAATTCAGGGAGGTAGTGACAATAAATAACAATGCCGGGCT-----AAGTCTGGCAATTGGAATGAGAACAATTTAAATCCCTTATCGAGGATCAATTGGAGGGCAAGTCTGGTGCCAGCAGCCGCGGTAATTCCAGCTCCAATAGCGTATATTAAAGTTGTTGCAGTTAAAAAGCTCGTAGTTGGATT-T--CTGG-ATTGA-----AC--GTCCG----GTC---------------ACTA----TT---C-----CAT--T-TT-AGAA--A---T----GTTGCCATTAG----------GT---------TG---------------TCTTTTACTGTGAATAACTCAGCTTGCTCCAGAAAGGCGTT--TGCC-TTGAATGCATTAGCATGGAATAATAAGATAAGAC---TTTGGTGGTC--TGTTTTGTTGGTTTACACACCA-GAG-TAATGATTAATAGGGACAGTTGGGGGTATCTATATTTCATTGTCAGAGGTGAAATTCTTGGATCAATGAAAGATAAACTAATGCGAAAGCATTTACCAAGGATGTTTTCTTTAATCAAGAACGAAAGTTAGGGGATCGAAGATGATTAGATACCATCGTAGTCTTAACCATAAACTATGCCGACTCGGGATTGGTAGTTGTTA-----ATGA--CATTATCAGCACCGTAAGAGAAATCAAAGTCTTTGGGTTCCGGGGGGAGTATGGTCGCAAGGCT------------------------------------------------------------------------------------------------------------------------------------------------------------------------------------------------------------------------------------------------------------------------------------------------------------------------------------------------------------------------------------------------------------------------------------------------------------------------------------------------------------------------------------------------------------------------------------------------------------------------------------------------
>Haptoglossa_zoospora_2
---TAGCATTTATTAGATTGAAACCAAT-G--CTTCGG-GGTATTGA-GTTGAATCATAATAACTGTGCG----G-AT----------CGGCGATAGATCATTTAAGTTTCTGCCCTATCAGCTTTGGATGGTAGGGTATTGGCCTACCATGGCGGTAACGGGTAACGGGGAATTAGGGTTCGATTCCGGAGAGGGAGCCTGAGAAACGGCTACCACATCCAAGGAAGGCAGCAGGCGCGTAAATTACCCAATCCTAATTCAGGGAGGTAGTGACAATAAATAACAATGCCGGGCT-----AAGTCTGGCAATTGGAATGAGAACAATTTAAATCCCTTATCGAGGATCAATTGGAGGGCAAGTCTGGTGCCAGCAGCCGCGGTAATTCCAGCTCCAATAGCGTATATTAAAGTTGTTGCAGTTAAAAAGCTCGTAGTTGGATT-T--CTGG-ATTGA-----AC--GTCCG----GTC---------------ACTA----TT---C-----CAT--T-TT-AGAA--A---T----GTTGCCATTAG----------GT---------TG---------------TCTTTTACTGTGAATAACTCAGCTTGCTCCAGAAAGGCGTT--TGCC-TTGAATGCATTAGCATGGAATAATAAGATAAGAC---TTTGGTGGTC--TGTTTTGTTGGTTTACACACCA-GAG-TAATGATTAATAGGGACAGTTGGGGGTATCTATATTTCATTGTCAGAGGTGAAATTCTTGGATCAATGAAAGATAAACTAATGCGAAAGCATTTACCAAGGATGTTTTCTTTAATCAAGAACGAAAGTTAGGGGATCGAAGATGATTAGATACCATCGTAGTCTTAACCATAAACTATGCCGACTCGGGATTGGTAGTTGTTA-----ATGA--CATTATCAGCACCGTAAGAGAAATCAAAGTCTTTGGGTTCCGGGGGGAGTATGGTCGCAAGGCT------------------------------------------------------------------------------------------------------------------------------------------------------------------------------------------------------------------------------------------------------------------------------------------------------------------------------------------------------------------------------------------------------------------------------------------------------------------------------------------------------------------------------------------------------------------------------------------------------------------------------------------------
>Haptoglossa_heterospora
---TAGCATTTATTAGATTGAAACCAAT-G--CTTCGG-GGTATTGA-GTTGAATCATAATAACTGTGCG----G-AT----------CGGCGATAGATCATATAAGTTTCTGCCCTATCAGCTTTGGATGGTAGGGTATTGGCCTACCATGGCGGTAACGGGTAACGGGGAATTAGGGTTCGATTCCGGAGAGGGAGCCTGAGAAACGGCTACCACATCCAAGGAAGGCAGCAGGCGCGTAAATTACCCAATCCTAATTCAGGGAGGTAGTGACAATAAATAACAATGCCGGGC------AAGTCTGGCAATTGGAATGAGAACAATTTAAATCCCTTAACGAGGATCAATTGGAGGGCAAGTCTGGTGCCAGCAGCCGCGGTAATTCCAGCTCCAATAGCGTATATTAAAGTTGTTGCAGTTAAAAAGCTCGTAGTTGGATT-T--CTGG-ATTGA-----AC--GTCCG----GTC---------------ACTA----TT---C-----CAT--T-TT-AGAA--A---T----GTTGCCATTAG----------GT---------TG---------------TCTTTTACTGTGAATAACTCAGCTTGCTCCAGAAAGGCGTT--TGCC-TTGAATGCATTAGCATGGAATAATAAGATAAGAC---TTTGGTGGTC--TGTTTTGTTGGTTTACACACCA-GAG-TAATGATTAATAGGGACAGTTGGGGGTATCTATATTTCATTGTCAGAGGTGAAATTCTTGGATCAATGAAAGATAAACTAATGCGAAAGCATTTACCAAGGATGTTTTCTTTAATCAAGAACGAAAGTTAGGGGATCGAAGATGATTAGATACCATCGTAGTCTTAACCATAAACTATGCCGACTCGGGATTGGTAGTTGTTA-----ATGA--CATTATCAGCACCGTAAGAGAAATCAAAGTCTTTGGGTTCCGGGGGGAGTATGGTCGCAAGGCT------------------------------------------------------------------------------------------------------------------------------------------------------------------------------------------------------------------------------------------------------------------------------------------------------------------------------------------------------------------------------------------------------------------------------------------------------------------------------------------------------------------------------------------------------------------------------------------------------------------------------------------------
>Eurychasma_dicksonii
---TAGCATTTATTAGAAAGAAACCAAT-G--CTTTGC-GGTATTGA-GTTGAATCATAATAACTGTGCG----G-AT----------CGGCGATAAATCATATAAGTTTCTGCCCTATCAGGTTTGGATGGTAGGGTATTGGCCTACCATGCCAGTAACGGGTAACGGAGTATTAGGGTACGATTCCGGAGAGGGAGCCTTAAAGACAGCTACCACTTCTAAGGAAGGCAGCAGGCGCGTAAATTACCCAATCCTGACACAGGGAGGTAGCGACAATAAATAACAATGCCGGGCT-----AAGTCTGGCAATTGGAATGAGAACAATTTAAATCCCTTATCGAGGATCAATTGGAGGGCAAGTCTGGTGCCAGCAGCCGCGGTAATTCCAGCTCCAATAGCGTATATTAAAGTTGTTGCAGTTAAAAAGCTCGTAGTTGGATT-T--CTGA-G-TGG-----AT--GTTCG----GTC---------------ACTA----TT---------CAT--T-TTTAGAG--A---G----ATTGCCATTAA----------TT---------TG---------------TCGTTTACTGTGAAAAAATTAGAGTGTTTAAAGCAGGCTTT--GGCC-TTGAATACATTAGCATGGAATAATAAGATATGAC---TTTGGTGGTC--TATTTTGTTGGTTTGCACACCA-GAG-TAATGATTAATAGGGACAGTTGGGGGTATTTATATTCCATCGTCAGAGGTGAAATTCTTGGATCGATGGAAGATAAACTAATGCGAAAGCATTTATCAAGGATGTTTTCATTAATCAAGAACGAAAGTTAGGGGATCGAAGATGATTAGATACCATCGTAGTCTTAACCATAAACTATGCCGACTCAGGATTGGTAGTTGTTA-----ATGA--CACTATCAGCACTGTATGAGAAATCAAAGTTTTTGGGTTCCGGGGGGAGTATGGTCGCAAGGCT------------------------------------------------------------------------------------------------------------------------------------------------------------------------------------------------------------------------------------------------------------------------------------------------------------------------------------------------------------------------------------------------------------------------------------------------------------------------------------------------------------------------------------------------------------------------------------------------------------------------------------------------
>Eurychasma_dicksonii_2
---TAGCATTTATTAGAAAGAAACCAAT-G--CTTTGC-GGTATTGA-GTTGAATCATAATAACTGTGCG----G-AT----------CGGCGATAAATCATATAAGTTTCTGCCCTATCAGGTTTGGATGGTAGGGTATTGGCCTACCATGCCAGTAACGGGTAACGGAGTATTAGGGTACGATTCCGGAGAGGGAGCCTTAAAGACAGCTACCACTTCTAAGGAAGGCAGCAGGCGCGTAAATTACCCAATCCTGACACAGGGAGGTAGCGACAATAAATAACAATGCCGGGCT-----AAGTCTGGCAATTGGAATGAGAACAATTTAAATCCCTTATCGAGGATCAATTGGAGGGCAAGTCTGGTGCCAGCAGCCGCGGTAATTCCAGCTCCNATAGCGTATATTAAAGTTGTTGCAGTTAAAAAGCTCGTAGTTGGAWT-T--CGAT-KGTGG-----AT--GTTCG----GTC---------------ACTA----TT---------CAT--T-TTTAGAG--A---G----ATTGCCATTAA----------TT---------TG---------------TCGTTTACTGTGAAAAAATTAGAGTGTTTAAAGCAGGCTTT--GGCC-TTGAATACATTAGCATGGAATAATAAGATATGAC---TTTGGTGGTC--TATTTTGTTGGTTTGCACACCA-GAG-TAATGATTAATAGGGACAGTTGGGGGTATTTATATTCCATCGTCAGAGGTGAAATTCTTGGATCGATGGAAGATAAACTAATGCGAAAGCATTTATCAAGGATGTTTTCATTAATCAAGAACGAAAGTTAGGGGATCGAAGATGATTAGATACCATCGTAGTCTTAACCATAAACTATGCCGACTCAGGATTGGTAGTTGTTA-----ATGA--CACTATCAGCACTGTATGAGAAATCAAAGTTTTTGGGTTCCGGGGGGAGTATGGTCGCAAGGCT------------------------------------------------------------------------------------------------------------------------------------------------------------------------------------------------------------------------------------------------------------------------------------------------------------------------------------------------------------------------------------------------------------------------------------------------------------------------------------------------------------------------------------------------------------------------------------------------------------------------------------------------
>Eurychasma_dicksonii_3
---TAGCATTTATTAGAAAGAAACCAAT-G--CTTTGC-GGTATTGA-GTTGAATCATAATAACTGTGCG----G-AT----------CGGCGATAAATCATATAAGTTTCTGCCCTATCAGGTTTGGATGGTAGGGTATTGGCCTACCATGCCAGTAACGGGTAACGGAGTATTAGGGTACGATTCCGGAGAGGGAGCCTTAAAGACAGCTACCACTTCTAAGGAAGGCAGCAGGCGCGTAAATTACCCAATCCTGACACAGGGAGGTAGCGACAATAAATAACAATGCCGGGCT-----AAGTCTGGCAATTGGAATGAGAACAATTTAAATCCCTTATCGAGGATCAATTGGAGGGCAAGTCTGGTGCCAGCAGCCGCGGTAATTCCAGCTCCAATAGCGTATATTAAAGTTGTTGCAGTTAAAAAGCTCGTAGTTGGATT-T--CTGA-GTGGA-----TG--TTTCG----GTC---------------ACTA----TT---------CAT--T-TTTAGAG--A---G----ATTGCCATTAA----------TT---------TG---------------TCGTTTACTGTGAAAAAATTAGAGTGTTTAAAGCAGGCTTT--GGCC-TTGAATACATTAGCATGGAATAATAAGATATGAC---TTTGGTGGTC--TATTTTGTTGGTTTGCACACCA-GAG-TAATGATTAATAGGGACAGTTGGGGGTATTTATATTCCATCGTCAGAGGTGAAATTCTTGGATCGATGGAAGATAAACTAATGCGAAAGCATTTATCAAGGATGTTTTCATTAATCAAGAACGAAAGTTAGGGGATCGAAGATGATTAGATACCATCGTAGTCTTAACCATAAACTATGCCGACTCAGGATTGGTAGTTGTTA-----ATGA--CACTATCAGCACTGTATGAGAAATCAAAGTTTTTGGGTTCCGGGGGGAGTATGGTCGCAAGGCT------------------------------------------------------------------------------------------------------------------------------------------------------------------------------------------------------------------------------------------------------------------------------------------------------------------------------------------------------------------------------------------------------------------------------------------------------------------------------------------------------------------------------------------------------------------------------------------------------------------------------------------------
>Uncultured_stramenopile_clone_BOLA320
---TAGCATTTATTAGATTGAAACCAAT-G--CTTCGG-GGTATTGT-GTTGAGTCATAATAACTGTGCG----G-AT----------CGGCGATGAATCAATTGAGTTTCTGCCCTATCAGCTTTGGATGGTAGGATATGGGCCTACCATGGCATTAACGGGTAACGGGGAATTAGGGTTTGATTCCGGAGAGGGAGCCTTAGAAACGGCTACCACATCCAAGGAAGGCAGCAGGCGCGTAAATTACCCAATCCTGACACAGGGAGGTAGTGACAATAAATAACAATGCCGGGCT-----AAGTCTGGCAATTGGAATGAGAACAATTTAAATCCCTTATCGAGGATCAATTGGAGGGCAAGTCTGGTGCCAGCAGCCGCGGTAATTCCAGCTCCAATAGCGTATATTAAAGTTGTTGCAGT-AAAAAGCTCGTAGTTGGATT-T--CTGG-TTTGG-----GT--GTCCG----GTC---------------ACTA----T----C-----CAT--T-TTTAGGA--A---C----TTTGTCATTAA----------GT---------TG---------------TCGTTTACTGTGAAAAAATTAGAGTGTTTAAAGCAGGCGT---CGCT-TTGAATACATTAGCATGGAATAATAAGATACGAC---TTTGGTGGTC--TATTTTGTTGGTTTGCACACCA-GAG-TAATGATTAATAGGGACAGTTGGGGGTATTCATATTTCAGCGTCAGAGGTGAAATTCTTGGATCGCTGAAAGATGAGCTTAGGCGAAAGCATTTACCAAGGATGTTTTCATTAATCAAGAACGAAAGTTAGGGGATCGAAGATGATTAGATACCATCGTAGTCTTA-CCATAAACTATGCCGACTCGGGATTGGCAGTCGTTA-----ATGA--CCTTGTCAGCACCGTATGAGAAATCAAAGTCTTTGGGTTCCGGGGGGAGTATGGTCGCAAGGCT------------------------------------------------------------------------------------------------------------------------------------------------------------------------------------------------------------------------------------------------------------------------------------------------------------------------------------------------------------------------------------------------------------------------------------------------------------------------------------------------------------------------------------------------------------------------------------------------------------------------------------------------
>Uncultured_stramenopile_clone_CCW73_18S
---TTGCATTTATTAGATTGAAACCAAT-C--CTT-GT-GGTATTC--GTTGAATCATGATAACTGTGCG----G-AT----------CGGCGATGAATCGAATGAGTTTCTGCCCTATCAGCTTTGGATGGTAGGATATGGGCCTACCATGGCGTTAACGGGTAACGGGGAATTAGGGTTTGATTCCGGAGAGGGAGCCCTAGAAACGGCTACCACATCCAAGGAAGGCAGCAGGCGCGTAAATTACCCAATCCTGACACAGGGAGGTAGTGACAATAAATAACAATGCCGGGCT-----AAGTCTGGCAATTGGAATGAGAACAATTTAAATCCCTTAACGAGGATCAATTGGAGGGCAAGTCTGGTGCCAGCAGCCGCGGTAATTCCAGCTCCAATAGCGTATATTAAAGTTGTTGCAGTTAAAAAACTCGTAGTTGGATT-T--CTGG-TTTGA-----AC--GTC-G----GTC---------------ACTA----TG---C-----CAT--T-TTTAGGA--T---A----TTTGTCATTAA----------GT---------TG---------------TCTTTTACTGTGAAAAAATTAGAGTGTTTAAAGCAGGCTTT--AGCC-TTGAATACATTAGCATGGAATAATAAGATACGAC---TTTGGTGGTC--TATTTTGTTGGTTTGCACACCA-GAG-TAATGATTAATAGGGACAGTTGGGGGTATTCATATTTCAGCGTCAGAGGTGAAATTCTTGGATCGCTGAAAGATGAGCTTAGGCGAAAGCATTTACCAAGGATGTTTTCATTAATCAAGAACGAAAGTTAGGGGATCGAAGATGATTAGATACCATCGTAGTCTTAACCATAAACTATGCCGACTCGGGATTGGCAGTCGTTA-----ATGA--CCTTGTCAGCACCGTATGAGAAATCAAAGTCTTTGGGTTCCGGGGGGAGTATGGTCGCAAGGCT------------------------------------------------------------------------------------------------------------------------------------------------------------------------------------------------------------------------------------------------------------------------------------------------------------------------------------------------------------------------------------------------------------------------------------------------------------------------------------------------------------------------------------------------------------------------------------------------------------------------------------------------
>Halocrusticida_baliensis
---TAGCATTTATTAGATTGAAACCAAT-G--CTTCGG-GGTATTGT-GTTGAGTCATAATAACTGTGCG----G-AT----------CGGCGATAAATCAATTGAGTTTCTGCCCTATCAGCTTTGGATGGTAGGATATGGGCCTACCATGGCGTTAACGGGTAACGGGGAATTAGGGTTTGATTCCGGAGAGGGAGCCTGAGAAACGGCTACCACATCCAAGGAAGGCAGCAGGCGCGTAAATTACCCAATCCTAATTCAGGGAGGTAGTGACAATAAATAACAATGCCGGGCT-----AAGTCTGGCAATTGGAATGAGAACAATTTAAATCCCTTAACGAGGATCAATTGGAGGGCAAGTCTGGTGCCAGCAGCCGCGGTAATTCCAGCTCCAATAGCGTATATTAAAGTTGTTGCAGTTAAAAAGCTCGTAGTTGGATT-T--CTGA-ATTGA-----AT--GTCCG----GTC---------------ACTT----TT---T-----CAT--T-TTTAGGA--T---A----TTTGTCATTAA----------GT---------TG---------------TCATTTACTGTGAAAAAATTAGAGTGTTTAAAGCAGGCGTT--TGCC-TTGAATACATTAGCATGGAATAATAAGATATGAC---TTTGGTGGTC--TATTTTGTTGGTTTGCACACCA-GAG-TAATGATTAATAGGGACAGTTGGGGGTATTCATATTTCAACGTCAGAGGTGAAATTCTTAGATCGTTGAAAGATGAGCTTAGGCGAAAGCATTTACCATGGATGTTTTCATTAATCAAGAACGAAAGTTAGGGGATCGAAGATGATTAGATACCATCGTAGTCTTAACCATAAACTATGCCGACTCGGGATTGGCAGTCGTTA-----ATGA--CCTTGTCAGCACCGTATGAGAAATCAAAGTCTTTGGGTTCCGGGGGGAGTATGGTCGCAAGGCT------------------------------------------------------------------------------------------------------------------------------------------------------------------------------------------------------------------------------------------------------------------------------------------------------------------------------------------------------------------------------------------------------------------------------------------------------------------------------------------------------------------------------------------------------------------------------------------------------------------------------------------------
>Halodaphnea_panulirata
---TAGCATTTATTAGATTGAAACCAAT-G--CTTCGG-GGTATTGT-GTTGAGTCATAATAACTGTGCG----G-AT----------CGGCGATAAATCAATTGAGTTTCTGCCCTATCAGCTTTGGATGGTAGGATATGGGCCTACCATGGCGTTAACGGGTAACGGGGAATTAGGGTTTGATTCCGGAGAGGGAGCCTGAGAAACGGCTACCACATCCAAGGAAGGCAGCAGGCGCGTAAATTACCCAATCCTAATTCAGGGAGGTAGTGACAATAAATAACAATGCCGGGCT-----AAGTCTGGCAATTGGAATGAGAACAATTTAAATCCCTTAACGAGGATCAATTGGAGGGCAAGTCTGGTGCCAGCAGCCGCGGTAATTCCAGCTCCAATAGCGTATATTAAAGTTGTTGCAGTTAAAAAGCTCGTAGTTGGATT-T--CTGA-ATTGA-----AT--GTCCG----GTC---------------ACTT----TT---T-----CAT--T-TTTAGGA--T---A----TTTGTCATTAA----------GT---------TG---------------TCATTTACTGTGAAAAAATTAGAGTGTTTAAAGCAGGCGTT--TGCC-TTGAATACATTAGCATGGAATAATAAGATACGAC---TTTGGTGGTC--TATTTTGTTGGTTTGCACACCA-GAG-TAATGATTAATAGGGACAGTTGGGGGTATTCATATTTCAACGTCAGAGGTGAAATTCTTAGATCGTTGAAAGATGAGCTTAGGCGAAAGCATTTACCATGGATGTTTTCATTAATCAAGAACGAAAGTTAGGGGATCGAAGATGATTAGATACCATCGTAGTCTTAACCATAAACTATGCCGACTCGGGATTGGCAGTCGTTA-----ATGA--CCTTGTCAGCACCGTATGAGAAATCAAAGTCTTTGGGTTCCGGGGGGAGTATGGTCGCAAGGCT------------------------------------------------------------------------------------------------------------------------------------------------------------------------------------------------------------------------------------------------------------------------------------------------------------------------------------------------------------------------------------------------------------------------------------------------------------------------------------------------------------------------------------------------------------------------------------------------------------------------------------------------
>Halocrusticida_parasitica
---TAGCATTTATTAGATTGAAACCAAT-G--CTTCGG-GGTATTGT-GTTGAGTCATAATAACTGTGCG----G-AT----------CGGCGATAAATCAATTGAGTTTCTGCCCTATCAGCTTTGGATGGTAGGATATGGGCCTACCATGGCGTTAACGGGTAACGGGGAATTAGGGTTTGATTCCGGAGAGGGAGCCTGAGAAACGGCTACCACATCCAAGGAAGGCAGCAGGCGCGTAAATTACCCAATCCTAATTCAGGGAGGTAGTGACAATAAATAACAATGCCGGGCT-----AAGTCTGGCAATTGGAATGAGAACAATTTAAATCCCTTAACGAGGATCAATTGGAGGGCAAGTCTGGTGCCAGCAGCCGCGGTAATTCCAGCTCCAATAGCGTATATTAAAGTTGTTGCAGTTAAAAAGCTCGTAGTTGGATT-T--CTGA-ATTGA-----AT--GTCCG----GTC---------------ACTT----TT---T-----CAT--T-TTTAGGA--T---A----TTTGTCATTAA----------GT---------TG---------------TCATTTACTGTGAAAAAATTAGAGTGTTTAAAGCAGGCGTT--TGCC-TTGAATACATTAGCATGGAATAATAAGATATGAC---TTTGGTGGTC--TATTTTGTTGGTTTGCACACCA-GAG-TAATGATTAATAGGGACAGTTGGGGGTATTCATATTTCAACGTCAGAGGTGAAATTCTTAGATCGTTGAAAGATGAGCTTAGGCGAAAGCATTTACCATGGATGTTTTCATTAATCAAGAACGAAAGTTAGGGGATCGAAGATGATTAGATACCATCGTAGTCTTAACCATAAACTATGCCGACTCGGGATTGGCAGTCGTTA-----ATGA--CCTTGTCAGCACCGTATGAGAAATCAAAGTCTTTGGGTTCCGGGGGGAGTATGGTCGCAAGGCT------------------------------------------------------------------------------------------------------------------------------------------------------------------------------------------------------------------------------------------------------------------------------------------------------------------------------------------------------------------------------------------------------------------------------------------------------------------------------------------------------------------------------------------------------------------------------------------------------------------------------------------------
>Haliphthoros_sp._NJM_0440
---TAGCATTTATTAGATTGAAACCAAT-G--CTTCGG-GGT-TTGT-GTTGAATCATAATAACTGTGCG----G-AT----------TGGCAACAAATCGATTGAGTTTCTGCCCTATCAGCTTTGGATGGTAGGATATGGGCCTACCATGGCGTTAACGGGTAACGGGGAATTAGGGTTTGATTCCGGAGAGGGAGCCTGAGAAACGGCTACCACATCCAAGGAAGGCAGCAGGCGCGTAAATTACCCAATCCTAATTCAGGGAGGTAGTGACAATAAATAACAATGCCGGGCT-----AAGTCTGGCAATTGGAATGAGAACAATTTAAATCCCTTATCGAGGATCAATTGGAGGGCAAGTCTGGTGCCAGCAGCCGCGGTAATTCCAGCTCCAATAGCGTATATTAAAGTTGTTGCAGTTAAAAAGCTCGTAGTTGGATT-T--CTGA-ATCGA-----AT--GTCCG----GTC---------------ACTA----TT---T-----CAT--T-TTTAGGA--A---A----TTTGTCATTAA----------GT---------TG---------------TCGTTTACTGTGAAAAAATTAGAGTGTTTAAAGCAGGCGTT--TGCC-TTGAATACATTAGCATGGAATAATAAGATATGAC---TTTGGTGGTC--TATTTTGTTGGTTTGCACACCA-GAG-TAATGATTAATAGGGACAGTTGGGGGTATTCATATTTCAGCGTCAGAGGTGAAATTCTTAGATCGCTGAAAGATGAGCTTAGGCGAAAGCATTTACCAAGGATGTTTTCATTAATCAAGAACGAAAGTTAGGGGATCGAAGATGATTAGATACCATCGTAGTCTTAACCATAAACTATGCCGACTCGGGATTGGCAGTCGTTA-----ATGA--CCTTGTCAGCACCGTATGAGAAATCAAAGTCTTTGGGTTCCGGGGGGAGTATGGTCGCAAGGCT------------------------------------------------------------------------------------------------------------------------------------------------------------------------------------------------------------------------------------------------------------------------------------------------------------------------------------------------------------------------------------------------------------------------------------------------------------------------------------------------------------------------------------------------------------------------------------------------------------------------------------------------
>Haliphthoros_milfordensis
---TAGCATTTATTAGATTGAAACCAAT-G--CTTCGG-GGT-TTGT-GTTGAATCATAATAACTGTGCG----G-AT----------GGGCCACAAATCGATTGAGTTTCTGCCCTATCAGCTTTGGATGGTAGGATATGGGCCTACCATGGCGTTAACGGGTAACGGGGAATTAGGGTTTGATTCCGGAGAGGGAGCCTGAGAAACGGCTACCACATCCAAGGAAGGCAGCAGGCGCGTAAATTACCCAATCCTAATTCAGGGAGGTAGTGACAATAAATAACAATGCCGGGCT-----AAGTCTGGCAATTGGAATGAGAACAATTTAAATCCCTTATCGAGGATCAATTGGAGGGCAAGTCTGGTGCCAGCAGCCGCGGTAATTCCAGCTCCAATAGCGTATATTAAAGTTGTTGCAGTTAAAAAGCTCGTAGTTGGATT-T--CTGA-ATCGA-----AT--GTCCG----GTC---------------ACAA----GT---T-----CAT--T-TTTAGGA--A---A----TTTGTCATTAA----------GT---------TG---------------TCGTTTACTGTGAAAAAATTAGAGTGTTTAAAGCAGGCGTT--TGCC-TTGAATACATTAGCATGGAATAATAAGATATGAC---TTTGGTGGTC--TATTTTGTTGGTTTGCACACCA-GAG-TAATGATTAATAGGGACAGTTGGGGGTATTCATATTTCAGCGTCAGAGGTGAAATTCTTAGATCGCTGAAAGATGAGCTTAGGCGAAAGCATTTACCAAGGATGTTTTCATTAATCAAGAACGAAAGTTAGGGGATCGAAGATGATTAGATACCATCGTAGTCTTAACCATAAACTATGCCGACTCGGGATTGGCAGTCGTTA-----ATGA--CCTTGTCAGCACCGTATGAGAAATCAAAGTCTTTGGGTTCCGGGGGGAGTATGGTCGCAAGGCT------------------------------------------------------------------------------------------------------------------------------------------------------------------------------------------------------------------------------------------------------------------------------------------------------------------------------------------------------------------------------------------------------------------------------------------------------------------------------------------------------------------------------------------------------------------------------------------------------------------------------------------------
>Haliphthoros_sp._NJM_0034
---TAGCATTTATTAGATTGAAACCAAT-G--CTTTG--GGTATTGT-GTTGAGTCATAATAACTGTGCG----G-AT----------CGGCGATGAATCAATTGAGTTTCTGCCCTATCAGCTTTGGATGGTAGGATATGGGCCTACCATGGCGTTAACGGGTAACGGGGAATTAGGGTTTGATTCCGGAGAGGGAGCCTTAGAAACGGCTACCACATCCAAGGAAGGCAGCAGGCGCGTAAATTACCCAATCCTGACACAGGGAGGTAGTGACAATAAATAACAATGCCGGGCT-----AAGTCTGGCAATTGGAATGAGAACAATTTAAATCCCTTATCGAGGATCAATTGGAGGGCAAGTCTGGTGCCAGCAGCCGCGGTAATTCCAGCTCCAATAGCGTATATTAAAGTTGTTGCAGTTAAAAAGCTCGTAGTTGGATT-T--CTGG-TTTGA-----AC--GTCCG----GTC---------------ACTA----TG---C-----CAT--T-TTTAGGA--A---A----TTTGCCATTAA----------GT---------TG---------------TCGTTTACTGTGAAAAAATTAGAGTGTTTAAAGCAGGCGTT--TGCT-TTGAATACATTAGCATGGAATAATAAGATACGAC---TTTGGTGGTC--TATTTTGTTGGTTTGCACACCA-GGG-TAATGATTAATAGGGACAGTTGGGGGTATTCATATTTCAGCGTCAGAGGTGAAATTCTTGGATCGCTGAAAGATGAGCTTAGGCGAAAGCATTTACCAAGGATGTTTTCATTAATCAAGAACGAAAGTTAGGGGATCGAAGATGATTAGATACCATCGTAGTCTTAACCATAAACTATGCCGACTCGGGATTGGCAGTCGTTA-----ATGA--CCTTGTCAGCACCGTATGAGAAATCAAAGTCTTTGGGTTCCGGGGGGAGTATGGTCGCAAGGCT------------------------------------------------------------------------------------------------------------------------------------------------------------------------------------------------------------------------------------------------------------------------------------------------------------------------------------------------------------------------------------------------------------------------------------------------------------------------------------------------------------------------------------------------------------------------------------------------------------------------------------------------
>Apodachlya_brachynema
---TAGCATTTATTAGATTGAAACCAAT-G--CTTCGG-GGTATTGT-GTTGAGTCATAATAACTGTGCG----G-AT----------CGGCGATAAATCAATTGAGTTTCTGCCCTATCAGCTTTGGATGGTAGGATATGGGCCTACCATGGCGTTAACGGGTAACGGGGAATTAGGGTTTGATTCCGGAGAGGGAGCCTTAGAAACGGCTACCACATCCAAGGAAGGCAGCAGGCGCGTAAATTACCCAATCCTGACACAGGGAGGTAGTGACAATAAATAACAATGTCGGGCT-----AAGTCTGACAATTGGAATGAGAACAATTTAAATCCCTTAACGAGGATCAATTGGAGGGCAAGTCTGGTGCCAGCAGCCGCGGTAATTCCAGCTCCAATAGCGTATATTAAAGTTGTTGCAGTTAAAAAGCTCGTAGTTGGATT-T--CTGA-TTTGA-----GC--GTCCG----GTC---------------ACTA----TG---T-----CAT--T-TTTAGGA--T---G----CCTGCCATTAA----------GT---------TG---------------TCGTTTACTGTGAAAAAATTAGAGTGTTTAAAGCAGGCGTT--TGCT-TTGAATACATTAGCATGGAATAATAAGATACGAC---CTTGGTGGTC--TATTTTGTTGGTTTGCACGCCA-GGG-TAATGATTAATAGGGACAGTTGGGGGTATTCATATTTCAGCGTCAGAGGTGAAATTCTTGGATCGTTGAAAGATGAGCTTAGGCGAAAGCATTTACCAAGGATGTTTTCATTAATCAAGAACGAAAGTTAGGGGATCGAAGATGATTAGATACCATCGTAGTCTTAACCATAAACTATGCCGACTCGGGATTGGCAGTCGTTA-----ATGA--CCTTGTCAGCACCGTATGAGAAATCAAAGTCTTTGGGTTCCGGGGGGAGTATGGTCGCAAGGCT------------------------------------------------------------------------------------------------------------------------------------------------------------------------------------------------------------------------------------------------------------------------------------------------------------------------------------------------------------------------------------------------------------------------------------------------------------------------------------------------------------------------------------------------------------------------------------------------------------------------------------------------
>Atkinsiella_dubia
---TAGCATTTATTAGATTGAAACCAAT-G--CTTCGG-GGTGTTGT-GTTGAGTCATAATAACTGTGCG----G-AT----------CGGCGATAGTTCAATTGAGTTTCTGCCCTATCAGCTTTGGATGGTAGGATATGGGCCTACCATGGCGTTAACGGGTAACGGGGAATTAGGGTTTGATTCCGGAGAGGGAGCCTTAGAAACGGCTACCACATCCAAGGAAGGCAGCAGGCGCGTAAATTACCTAATCCTGACACAGGGAGGTAGTGACAATAAATAACAATGTCGGGCT-----AAGTCTGGCAATTGGAATGAGAACAATTTAAATCCCTTAACGAGGATCAATTGGAGGGCAAGTCTGGTGCCAGCAGCCGCGGTAATTCCAGCTCCAATAGCGTATATTAAAGTGGTTGCAGTTAAAAAGCTCGTAGTTGGATT-A--CTGG-TTTGA-----GC--GTCCG----GCC---------------GCTA----TA---C-----CAT--T-TTTAGGA--T---G----CCTGCCATTAA----------GT---------TG---------------TCGTTTACTGTGGAAAAATTAGAGTGTTTAAAGCAGCCGTT--TGGT-TTGAATACATTAGCATGGAATAATAAGATACGAC---TTTGGTGGTC--TATTTTGTTGGTTTGCACACCA-GAG-TAATGATTAATAGGGACAGTTGGGGGTATTCATATTTCAGCGTCAGAGGTGAAATTCTTGGATCGCTGAAAGATGAGCTTAGGCGAAAGCATTTACCAAGGATGTTTTCATTAATCAAGAACGAAAGTTAGGGGATCGAAGATGATTAGATACCATCGTAGTCTTAACCATAAACTATGCCGACTCGGGATTGGCAGTCGTTA-----ATGA--CCTTGTCAGCACCGTATGAGAAATCAAAGTCTTTGGGTTCCGGGGGGAGTATGGTCGCAAGGCT------------------------------------------------------------------------------------------------------------------------------------------------------------------------------------------------------------------------------------------------------------------------------------------------------------------------------------------------------------------------------------------------------------------------------------------------------------------------------------------------------------------------------------------------------------------------------------------------------------------------------------------------
>Leptolegnia_caudata
---TAGCATTTATTAGATTGAAACCAAT-G--CTTCGG-GGTATTGT-GTTGAGTCATAATAACTGTGCG----G-AT----------CGGCGATAAATCAATTGAGTTTCTGCCCTATCAGCTTTGGATGGTAGGATATGGGCCTACCATGGCGTTAACGGGTAACGGGGAATTAGGGTTTGATTCCGGAGAGGGAGCCTTAGAAACGGCTACCACATCCAAGGAAGGCAGCAGGCGCGTAAATTACCCAATCCTGACACAGGGAGGTAGTGACAATAAATAACAATGTCGGGCT-----AAGTCTGACAATTGGAATGAGAACAATTTAAATCCCTTAACGAGGATCAATTGGAGGGCAAGTCTGGTGCCAGCAGCCGCGGTAATTCCAGCTCCAATAGCGTATATTAAAGTTGTTGCAGTTAAAAAGCTCGTAGTTGGATT-T--CTGG-TTTGA-----GC--GTCCG----GTC---------------ACTA----TG---C-----CAT--A-TTTAGGA--T---G----CCTGCCATTCA----------GT---------TG---------------TCGTTTACTGTGAAAAAATTAGAGTGTTTAAAGCAGGCGTT--TGCT-TTGAATACATTAGCATGGAATAATAAGATACGAC---CTTGG---TC--TATTTTGTTGGTTTGCATACCG-AGG-TAATGATTAATAGGGACAGTTGGGGGTATTCATATTTCAACGTCAGAGGTGAAATTCTTGGATCGTTGAAAGATGAGCTTAGGCGAAAGCATTTACCAAGGATGTTTTCATTAATCAAGAACGAAAGTTAGGGGATCGAAGATGATTAGATACCATCGTAGTCTTAACCATAAACTATGCCGACTCGGGATTGGCAGTCGTTA-----ATGA--CCTTGTCAGCACCGTATGAGAAATCAAAGTCTTTGGGTTCCG-GGGGAGTATGGTCGCAAGGCT------------------------------------------------------------------------------------------------------------------------------------------------------------------------------------------------------------------------------------------------------------------------------------------------------------------------------------------------------------------------------------------------------------------------------------------------------------------------------------------------------------------------------------------------------------------------------------------------------------------------------------------------
>Leptolegnia_chapmanii
---TAGCATTTATTAGATTGAAACCAAT-G--CTTCGG-GGTATTGT-GTTGAGTCATAATAACTGTGCG----G-AT----------CGGCGATAAGTCAATTGAGTTTCTGCCCTATCAGCTTTGGATGGTAGGATATGGGCCTACCATGGCGTTAACGGGTAACGGGGAATTAGGGTTTGATTCCGGAGAGGGAGCCTTAGAAACGGCTACCACATCCAAGGAAGGCAGCAGGCGCGTAAATTACCCAATCCTGACACAGGGAGGTAGTGACAATAAATAACAATGTCGGGCT-----AAGTCTGACAATTGGAATGAGAACAATTTAAATCCCTTAACGAGGATCAATTGGAGGGCAAGTCTGGTGCCAGCAGCCGCGGTAATTCCAGCTCCAATAGCGTATATTAAAGTTGTTGCAGTTAAAAAGCTCGTAGTTGGATT-T--CTGG-TTTGA-----GC--GTCCG----GTC---------------ACTA----AG---C-----CAT--A-TTTAGGA--T---G----CCTGCCATTGA----------GT---------TG---------------TCGTTTACTGTGAAAAAATTAGAGTGTTTAAAGCAGGCGTT--TGCT-TTGAATACATTAGCATGGAATAATAAGATACGAC---CTTGG---TC--TATTTTGTTGGTTTGCACACCG-AGG-TAATGATTAATAGGGACAGTTGGGGGTATTCATATTTCAACGTCAGAGGTGAAATTCTTGGATCGTTGAAAGATGAGCTTAGGCGAAAGCATTTACCAAGGATGTTTTCATTAATCAAGAACGAAAGTTAGGGGATCGAAGATGATTAGATACCATCGTAGTCTTAACCATAAACTATGCCGACTCGGGATTGGCAGTCGTTA-----ATGA--CCTTGTCAGCACCGTATGAGAAATCAAAGTCTTTGGGTTCCGGGGGGAGTATGGTCGCAAGGCT------------------------------------------------------------------------------------------------------------------------------------------------------------------------------------------------------------------------------------------------------------------------------------------------------------------------------------------------------------------------------------------------------------------------------------------------------------------------------------------------------------------------------------------------------------------------------------------------------------------------------------------------
>Saprolegnia_ferax
---TAGCATTTATTAGATTGAAACCAAT-G--CCTCGG-GGTATTGT-GTTGAATCATAAGAACTGTGCG----G-AT----------CGGCGATAAGTCAATTGAGTTTCTGCCCTATCAGCTTTGGATGGTAGGATATGGGCCTACCATGGCGTTAACGGGTAACGGGGAATTAGGGTTTGATTCCGGAGAGGGAGCCTTAGAAACGGCTACCACATCCAAGGAAGGCAGCAGGCGCGTAAATTACCCAATCCTGACACAGGGAGGTAGTGACAATAAATAACAATGCCGGGCT-----AAGTCTGGCAATTGGAATGAGAACAATTTAAATCCCTTAACGAGGATCAATTGGAGGGCAAGTCTGGTGCCAGCAGCCGCGGTAATTCCAGCTCCAATAGCGTATATTAAAGTTGTTGCAGTTAAAAAGCTCGTACTTGGATT-T--CTGG-TTTGA-----GC--GTCCG----GTC---------------ACTA----TG---C-----CAT--T-TTTAGGG--G---G----CGTGCCATTCA----------GT---------TG---------------TCGTTTACTGTGAAAAAATTAGAGTGTTTAAAGCAGGCGTT--TGCT-TTGAATACATTAGCATGGAATAATAAGATACGAC---CTTGGTGGTC--TATTTTGTTGGTTTGCACACCG-AGG-TAATGATTAATAGGGACAGTTGGGGGTATTCATATTTCAACGTCAGAGGTGAAATTCTTGGATCGTTGAAAGATGAGCTTAGGCGAAAGCATTTACCAAGGATGTTTTCATTAATCAAGAACGAAAGTTAGGGGATCGAAGATGATTAGATACCATCGTAGTCTTAACCATAAACTATGCCGACTCGGGATTGGCAGTCGTTA-----ATGA--CCTTGTCAGCACCGTATGAGAAATCAAAGTCTTTGGGTTCCG-GGGGAGTATGGTCGCAAGGCT------------------------------------------------------------------------------------------------------------------------------------------------------------------------------------------------------------------------------------------------------------------------------------------------------------------------------------------------------------------------------------------------------------------------------------------------------------------------------------------------------------------------------------------------------------------------------------------------------------------------------------------------
>Aplanopsis_terrestris
---TAGCATTTATTAGATTGAAACCAAT-G--CCTCGG-GGTATTGT-GTTGAGTCATAATAACTGTGCG----G-AT----------CGGCGATAAGTCAATTGAGTTTCTGCCCTATCAGCTTTGGATGGTAGGATATGGGCCTACCATGGCGTTAACGGGTAACGGGGAATTAGGGTTTGATTCCGGAGAGGGAGCCTTAGAAACGGCTACCACATCCAAGGAAGGCAGCAGGCGCGTAAATTACCCAATCCTGACACAGGGAGGTAGTGACAATAAATAACAATGTCGGGCT-----AAGTCTGACAATTGGAATGAGAACAATTTACATCCCTTATCGAGGATCAATTGGAGGGCAAGTCTGGTGCCAGCAGCCGCGGTAATTCCAGCTCCAATAGCGTATATTAAAGTTGTTGCAATTAAAAAGCTCGTAGTTGGATT-T--CTGG-TTTGA-----GC--GTCCG----GTC---------------ACTA----TG---C-----CAT--T-TTTAGGG--G---G----CCTGCCATTCA----------AT---------TG---------------TCGTTTACTGTGAAAAAATTAGAGTGTTTAAAGCAGGCGTT--TGCT-TTGAATACATTAGCATGGAATAATAAGATACAAC---CTTGGG--TC--TATTTTGTTGGTTTGCACACCG-AGG-TAATGATTAATAGGGACAGTTGGGGGTATTCATATTTCAACGTCAGAGGTGAAATTCTTGGATCGTTGAAAGATGAGCTTAGGCGAAAGCATTTACCAAGGATGTTTTCATTAATCAAGAACGAAAGTTAGGGGATCGAAGATGATTAGATACCATCGTAGTCTTAACCATAAACTATGCCGACTCGGGATTGGCAGTCGTTA-----ATGA--CCTTGTCAGCACCGTATGAGAAATCAAAGTCTTTGGGTTCCGGGGGGAGTATGGTCGCAAGGCT------------------------------------------------------------------------------------------------------------------------------------------------------------------------------------------------------------------------------------------------------------------------------------------------------------------------------------------------------------------------------------------------------------------------------------------------------------------------------------------------------------------------------------------------------------------------------------------------------------------------------------------------
>Newbya_dichotoma
---TAGCATTTATTAGATTGAAACCAAT-G--CTTCGG-GGTGTTGT-GTTGAGTCATAATAACTGTGCG----G-AT----------CGGCGATAGATCCATTGAGTTTCTGCCCTATCAGCTTTGGATGGTAGGATATGGGCCTACCATGGCGTTAACGGGTAACGGGGAATTAGGGTTTGATTCCGGAGAGGGAGCCTTAGAAACGGCTACCACATCCAAGGAAGGCAGCAGGCGCGTAAATTACCCAATCCTGACACAGGGAGGTAGTGACAATAAATAACAATGTCGGGCT-----AAGTCTGACAATTGGAATGAGAACAATTTAAATCCCTTAACGAGGATCAATTGGAGGGCAAGTCTGGTGCCAGCAGCCGCGGTAATTCCAGCTCCAATAGCGTATATTAAAGTTGTTGCAGTTAAAAAGCTCGTAGTTGGATT-T--CTGG-TTTGA-----GC--GTCCG----GTC---------------ACTA----TG---C-----CAT--T-TTTAGGG--G---G----CTTGCCATTGA----------GT---------TG---------------TCGTTTACTGTGAAAAAATTAGAGTGTTTAAAGCAGGCGTT--TGCT-TTGAATACATTAGCATGGAATAATAAGATACGAC---CTTGGTGGTC--TATTTTGTTGGTTTGCACACCG-AGG-TAATGATTAATAGGGACAGTTGGGGGTATTCATATTTCAACGTCAGAGGTGAAATTCTTGGATCGTTGAAAGATGAGCTTAGGCGAAAGCATTTACCAAGGATGTTTTCATTAATCAAGAACGAAAGTTAGGGGATCGAAGATGATTAGATACCATCGTAGTCTTAACCATAAACTATGCCGACTCGGGATTGGCAGTCGTTA-----ATGA--CCTTGTCAGCACCGTATGAGAAATCAAAGTCTTTGGGTTCCGGGGGGAGTATGGTCGCAAGGCT------------------------------------------------------------------------------------------------------------------------------------------------------------------------------------------------------------------------------------------------------------------------------------------------------------------------------------------------------------------------------------------------------------------------------------------------------------------------------------------------------------------------------------------------------------------------------------------------------------------------------------------------
>Achlya_apiculata
---TAGCATTTATTAGATTGAAACCAAT-G--CTTCGG-GGTGTTGT-GTTGAGTCATAATAACTGTGCG----G-AT----------CGGCGATAGATCCATTGAGTTTCTGCCCTATCAGCTTTGGATGGTAGGATATGGGCCTACCATGGCGTTAACGGGTAACGGGGAATTAGGGTTTGATTCCGGAGAGGGAGCCTTAGAAACGGCTACCACATCCAAGGAAGGCAGCAGGCGCGTAAATTACCCAATCCTGACACAGGGAGGTAGTGACAATAAATAACAATGTCGGGCT-----AAGTCTGACAATTGGAATGAGAACAATTTAAATCCCTTAACGAGGATCAATTGGAGGGCAAGTCTGGTGCCAGCAGCCGCGGTAATTCCAGCTCCAATAGCGTATATTAAAGTTGTTGCAGTTAAAAAGCTCGTAGTTGGATT-T--CTGG-TTTGA-----GC--GTCCG----GTC---------------ACTA----TG---C-----CAT--T-TTTAGGG--G---G----CTTGCCATTGA----------GT---------TG---------------TCGTTTACTGTGAAAAAATTAGAGTGTTTAAAGCAGGCGTT--TGCT-TTGAATACATTAGCATGGAATAATAAGATACGAC---CTTGGTGGTC--TATTTTGTTGGTTTGCACACCG-AGG-TAATGATTAATAGGGACAGTTGGGGGTATTCATATTTCAACGTCAGAGGTGAAATTCTTGGATCGTTGAAAGATGAGCTTAGGCGAAAGCATTTACCAAGGATGTTTTCATTAATCAAGAACGAAAGTTAGGGGATCGAAGATGATTAGATACCATCGTAGTCTTAACCATAAACTATGCCGACTCGGGATTGGCAGTCGTTA-----ATGA--CCTTGTCAGCACCGTATGAGAAATCAAAGTCTTTGGGTTCCGGGGGGAGTATGGTCGCAAGGCT------------------------------------------------------------------------------------------------------------------------------------------------------------------------------------------------------------------------------------------------------------------------------------------------------------------------------------------------------------------------------------------------------------------------------------------------------------------------------------------------------------------------------------------------------------------------------------------------------------------------------------------------
>Aphanomyces_invadans
---UAGCAUUUAUUAGAUUGAAACCAAU-U--CUUCGG-GAUUUUGU-GUUGAAUCAUAAUAACUGUGCU----G-AU----------CGGCGAUAAGUCGAUUGAGUUUCUGCCCUAUCAGCUUUGGAUGGUAGGAUAUGGGCCUACCAUGGCGUUAACGGGUAACGGGGAAUUAGGGUUUGAUUCCGGAGAGGGAGCCUUAGAAACGGCUACCACAUCCAAGGAAGGCAGCAGGCGCGUAAAUUACCCAAUCCUGACACAGGGAGGUAGUGACAAUAAAUAACAAUGCCGGGCU-----UAGUCUGGCAAUUGGAAUGAGAACAAUUUAAAUCCCUUAACGAGGAUCAAUUGGAGGGCAAGUCUGGUGCCAGCAGCCGCGGUAAUUCCAGCUCCAAUAGCGUAUAUUAAAGUUGUUGCAGUUAAAAAGCUCGUAGUUGGAUU-U--CUGG-UUUGA-----GC--GUCCG----GUC---------------ACUA----UG---C-----CAU--A-UUUAGGA--U---G----CCUGCCAUUGA----------GU---------UG---------------UCGUUUACUGUGAAAAAAUUAGAGUGUUUAAAGCAGGCGUU--UGCU-UUGAAUACAUUAGCAUGGAAUAAUAAGAUACGAC---CUUGGUGGUC--UAUUUUGUUGGUUUGCACGCCA-GGG-UAAUGAUUAAUAGGGACAGUUGGGGGUAUUCAUAUUUCAACGUCAGAGGUGAAAUUCUUGGAUCGUUGAAAGAUGAGCUUAGGCGAAAGCAUUUACCAAGGAUGUUUUCAUUAAUCAAGAACGAAAGUCAGGGGAUCGAAGAUGAUUAGAUACCAUCGUAGUCUUGACCAUAAACUAUGCCGACUCGGGAUUGGCAGUCGUUA-----AUGA--CCUUGUCAGCACCGUAUGAGAAAUCAAAGUCUUUGGGUUCCGGGGGGAGUAUGGUCGCAAGGCU------------------------------------------------------------------------------------------------------------------------------------------------------------------------------------------------------------------------------------------------------------------------------------------------------------------------------------------------------------------------------------------------------------------------------------------------------------------------------------------------------------------------------------------------------------------------------------------------------------------------------------------------
>Sapromyces_elongatus
---TAGCATTTATTAGATTGAAACCAAT-G--CTCGGG-GGTATTGT-GTTGAGTCATAATAACTGTGCG----G-AT----------CGGCGATAAATCAATTGAGTTTCTGCCCTATCAGCTTTGGATGGTAGGATATGGGCCTACCATGGCGTTAACGGGTAACGGGGAATTAGGGTTTGATTCCGGAGAGGGAGCCTTAGAAACGGCTACCACATCCAAGGAAGGCAGCAGGCGCGTAAATTACCCAATCCTGATACAGGGAGGTAGTGACAATAAATAACAATGCCAT-GC-----AAGTATGGCAATTGGAATGAGAACAATTTAAATCCCTTAACGAGGATCAATTGGAGGGCAAGTCTGGTGCCAGCAGCCGCGGTAATTCCAGCTCCAATAGCGTATATTAAAGTTGTTGCAGTTAAAAAGCTCGTAGTTGGATT-T--CTGA-TTTGG-----AC--GTCCG----GTC---------------ACTA----TG---T-----CAT--T-TTTAGGA--T---G----TTTGCCATTAA----------GT---------TG---------------TCGTTTACTGTGAAAAAATTAGAGTGTTTAAAGCAGGCATT--TGCT-TTGAATACATTAGCATGGAATAATAAAATACGAC---CTTGGTGGTC--TATTTTGTTGGTTTGCACACCA-GGG-TAATGATTAATAGGGACAGTTGGGGGTATTCATATTTCAGCGTCAGAGGTGAAATTCTTGGATCGCTGAAAGATGAGCTTAGGCGAAAGCATTTATCAAGGATGTTTTCATTAATCAAGAACGAAAGTTAGGGGATCGAAGATGATTAGATACCATCGTAGTCTTAACCATAAACTATGCCGACTCGGGATTGGCAGTCGTTA-----ATGA--CCTTGTCAGCACCGTATGAGAAATCAAAGTCTTTGGGTTCCGGGGGGAGTATGGTCGCAAGGCT------------------------------------------------------------------------------------------------------------------------------------------------------------------------------------------------------------------------------------------------------------------------------------------------------------------------------------------------------------------------------------------------------------------------------------------------------------------------------------------------------------------------------------------------------------------------------------------------------------------------------------------------
>Phytophthora_pinifolia
---TAGCATTTATTAGATTGAAACCAAT-G--CTCGGG-GGTATTGT-GTTGAGTCATAATAACTGTGCG----G-AT----------CGGCGATAAATCGATTGAGTTTCTGCCCTATCAGCTTTGGATGGTAGGATATGGGCCTACCATGGCATTAACGGGTAACGGGGAATTAGGGTTTGATTCCGGAGAGGGAGCCTTAGAAACGGCTACCACATCCAAGGAAGGCAGCAGGCGCGTAAATTACCCAATCCTGACACAGGGAGGTAGTGACAATAAATAACAATGCTCTGGC-----GAGTCGGGCAATTGGAATGAGAACAATTTAAATCCCTTAACGAGGATCAATTGGAGGGCAAGTCTGGTGCCAGCAGCCGCGGTAATTCCAGCTCCAATAGCGTATATTAAAGTTGTTGCAGTTAAAAAGCTCGTAGTTGGATT-T--CTGT-TTTGG-----AT--GTCCG----GTC---------------ACTT----AG---G-----CAT--T-TTTAGGC--T---G----CCTGCCATTAA----------GT---------TG---------------TCGTTTACTGTGAAAAAATTAGAGTGTTTAAAGCAGGCGTT--TGCT-TTGAATACATTAGCATGGAATAATAAGATACGGC---CTTGGTGGTC--TATTTTGTTGGTTTGCACACCA-GGG-TAATGATTAATAGGGACAGTTGGGGGTATTCATATTTCAGCGTCAGAGGTGAAATTCTTGGATCGCTGAAAGATGAGCTTAGGCGAAAGCATTTACCAAGGATGTTTTCATTAATCAAGAACGAAAGTTAGGGGATCGAAGATGATTAGATACCATCGTAGTCTTAACCATAAACTATGCCGACTCGGGATTGGCAGTCGTTA-----ATGA--CCTTGTCAGCACCGTATGAGAAATCAAAGTCTTTGGGTTCCGGGGGGAGTATGGTCGCAAGGCT------------------------------------------------------------------------------------------------------------------------------------------------------------------------------------------------------------------------------------------------------------------------------------------------------------------------------------------------------------------------------------------------------------------------------------------------------------------------------------------------------------------------------------------------------------------------------------------------------------------------------------------------
>Phytophthora_megasperma
---TAGCATTTATTAGATTGAAACCAAT-G--CTCGGG-GGTATTGT-GTTGAGTCATAATAACTGTGCG----G-AT----------CGGCGATAAATCGATTGAGTTTCTGCCCTATCAGCTTTGGATGGTAGGATATGGGCCTACCATGGCATTAACGGGTAACGGGGAATTAGGGTTTGATTCCGGAGAGGGAGCCTTAGAAACGGCTACCACATCCAAGGAAGGCAGCAGGCGCGTAAATTACCCAATCCTGACACAGGGAGGTAGTGACAATAAATAACAATGCTCTGGC-----GAGTCGGGCAATTGGAATGAGAACAATTTAAATCCCTTAACGAGGATCAATTGGAGGGCAAGTCTGGTGCCAGCAGCCGCGGTAATTCCAGCTCCAATAGCGTATATTAAAGTTGTTGCAGTTAAAAAGCTCGTAGTTGGATT-T--CTGT-TTTGG-----AT--GTCCG----GTC---------------ACTT----AG---G-----CAT--T-TTTAGGC--T---G----CCTGCCATTAA----------GT---------TG---------------TCGTTTACTGTGAAAAAATTAGAGTGTTTAAAGCAGGCGTT--TGCT-TTGAATACATTAGCATGGAATAATAAGATACGGC---CTTGGTGGTC--TATTTTGTTGGTTTGCACACCA-GGG-TAATGATTAATAGGGACAGTTGGGGGTATTCATATTTCAGCGTCAGAGGTGAAATTCTTGGATCGCTGAAAGATGAGCTTAGGCGAAAGCATTTACCAAGGATGTTTTCATTAATCAAGAACGAAAGTTAGGGGATCGAAGATGATTAGATACCATCGTAGTCTTAACCATAAACTATGCCGACTCGGGATTGGCAGTCGTTA-----ATGA--CCTTGTCAGCACCGTATGAGAAATCAAAGTCTTTGGGTTCCGGGGGGAGTATGGTCGCAAGGCT------------------------------------------------------------------------------------------------------------------------------------------------------------------------------------------------------------------------------------------------------------------------------------------------------------------------------------------------------------------------------------------------------------------------------------------------------------------------------------------------------------------------------------------------------------------------------------------------------------------------------------------------
>Plasmopara_viticola
---TAGCATTTATTAGATTGAAACCAAT-G--CTCGGG-GGTATTGT-GTTGAGTCATAATAACTGTGCG----G-AT----------CGGCGATAAATCGATTGAGTTTCTGCCCTATCAGCTTTGGATGGTAGGATATGGGCCTACCATGGCATTAACGGGTAACGGGGAATTAGGGTTTGATTCCGGAGAGGGAGCCTTAGAAACGGCTACCACATCCAAGGAAGGCAGCAGGCGCGTAAATTACCCAATCCTGATACAGGGAGGTAGTGACAATAAATAACAATGCTCTGGC-----GAGTCGGGCAATTGGAATGAGAACAATTTAAATCCCTTAACGAGGATCAATTGGAGGGCAAGTCTGGTGCCAGCAGCCGCGGTAATTCCAGCTCCAATAGCGTATATTAAAGTTGTTGCAGTTAAAAAGCTCGTAGTTGGATT-T--CTGC-TTTGG-----AT--GTCCG----GTC---------------ACTT----AA---G-----CAT--T-TTTAGGT--T---G----CCTGCCATTAA----------GT---------TG---------------TCGTTTACTGTGAAAAAATTAGAGTGTTTAAAGCAGGCGTT--AGCT-TTGAATACATTAGCATGGAATAATAAGATATGAC---TTTGGTGGTC--TATTTTGTTGGTTTGCACACCA-GAG-TAATGATTAATAGGGACAGTTGGGGGTATTCATATTTCAGCGTCAGAGGTGAAATTCTTGGATCGCTGAAAGATGAGCTTAGGCGAAAGCATTTACCAAGGATGTTTTCATTAATCAAGAACGAAAGTTAGGGGATCGAAGATGATTAGATACCATCGTAGTCTTAACCATAAACTATGCCGACTCGGGATTGGCAGTCGTTA-----ATGA--CCTTGTCAGCACCGTATGAGAAATCAAAGTCTTTGGGTTCCGGGGGGAGTATGGTCGCGAGGCT------------------------------------------------------------------------------------------------------------------------------------------------------------------------------------------------------------------------------------------------------------------------------------------------------------------------------------------------------------------------------------------------------------------------------------------------------------------------------------------------------------------------------------------------------------------------------------------------------------------------------------------------
>Pythium_vexans
---TAGCATTTATTAGATTGAAACCAAT-G--CTCGGG-GGTATTGT-GTTGAGTCATAATAACTGTGCG----G-AT----------CGGCGATAAGTCGATTGAGTTTCTGCCCTATCAGCTTTGGATGGTAGGATATGGGCCTACCATGGCATTAACGGGTAACGGGGAATTAGGGTTTGATTCCGGAGAGGGAGCCTTAGAAACGGCTACCACATCCAAGGAAGGCAGCAGGCGCGTAAATTACCCAATCCTGACACAGGGAGGTAGTGACAATAAATAACAATGCTCTGGC-----GAGTCGGGCAATTGGAATGAGAACAATTTAAATCCCTTAACGAGGATCAATTGGAGGGCAAGTCTGGTGCCAGCAGCCGCGGTAATTCCAGCTCCAATAGCGTATATTAAAGTTGTTGCAGTTAAAAAGCTCGTAGTTGGATT-T--CTGC-TTTGA-----GC--GTCCG----GTC---------------ACTC----TG---G-----CAT--T-TTTAGGA--T---G----TTTGCCATTAA----------GT---------TG---------------TCGTTTACTGTGAAAAAATTAGAGTGTTTAAAGCAGGCGTT--TGCT-TTGAATACATTAGCATGGAATAATAAGATACGAC---CTTGGTGGTC--TATTTTGTTGGTTTGCACACCA-GGG-TAATGATTAATAGGGACAGTTGGGGGTATTCATATTTCAGCGTCAGAGGTGAAATTCTTGGATCGCTGAAAGATGAGCTTAGGCGAAAGCATTTACCAAGGATGTTTTCATTAATCAAGAACGAAAGTTAGGGGATCGAAGATGATTAGATACCATCGTAGTCTTAACCATAAACTATGCCGACTCGGGATTGGCAGTCGTTA-----ATGA--CCTTGTCAGCACCGTATGAGAAATCAAAGTCTTTGGGTTCCGGGGGGAGTATGGTCGCAAGGCT------------------------------------------------------------------------------------------------------------------------------------------------------------------------------------------------------------------------------------------------------------------------------------------------------------------------------------------------------------------------------------------------------------------------------------------------------------------------------------------------------------------------------------------------------------------------------------------------------------------------------------------------
>Pythium_nunn
---TAGCATTTATTAGATTGAAACCAAT-G--CTCGGG-GGTATTGT-GTTGAGTCATAATAACTGTGCG----G-AT----------CGGCGATAAGTCGATTGAGTTTCTGCCCTATCAGCTTTGGATGGTAGGATATGGGCCTACCATGGCATTAACGGGTAACGGGGAATTAGGGTTTGATTCCGGAGAGGGAGCCTTAGAAACGGCTACCACATCCAAGGAAGGCAGCAGGCGCGTAAATTACCCAATCCTGACACAGGGAGGTAGTGACAATAAATAACAATGCTCTGGC-----GAGTCGGGCAATTGGAATGAGAACAATTTAAATCCCTTAACGAGGATCAATTGGAGGGCAAGTCTGGTGCCAGCAGCCGCGGTAATTCCAGCTCCAATAGCGTATATTAAAGTTGTTGCAGTTAAAAAGCTCGTAGTTGGATT-T--CTGT-CAGGA-----GC--GTCCG----GTC---------------ACTT----TG---G-----CAT--T-TTTAGGA--T---G----TTTGCCATTAA----------GT---------TG---------------TCGTTTACTGTGAAAAAATTAGAGTGTTTAAAGCAGGCGTT--TGCT-TTGAATACATTAGCATGGAATAATAAGATACGAC---CTTGGTGGTC--TATTTTGTTGGTTTGCACACCA-GGG-TAATGATTAATAGGGACAGTTGGGGGTATTCATATTTCAGCGTCAGAGGTGAAATTCTTGGATCGCTGAAAGATGAGCTTAGGCGAAAGCATTTACCAAGGATGTTTTCATTAATCAAGAACGAAAGTTAGGGGATCGAAGATGATTAGATACCATCGTAGTCTTAACCATAAACTATGCCGACTCGGGATTGGCAGTCGTTA-----ATGA--CCTTGTCAGCACCGTATGAGAAATCAAAGTCTTTGGGTTCCGGGGGGAGTATGGTCGCAAGGCT------------------------------------------------------------------------------------------------------------------------------------------------------------------------------------------------------------------------------------------------------------------------------------------------------------------------------------------------------------------------------------------------------------------------------------------------------------------------------------------------------------------------------------------------------------------------------------------------------------------------------------------------
>Pythium_splendens
---TAGCATTTATTAGATTGAAACCAAT-G--CTCGGG-GGTATTGT-GTTGAGTCATAATAACTGTGCG----G-AT----------CGGCGATAAATCGATTGAGTTTCTGCCCTATCAGCTTTGGATGGTAGGATATGGGCCTACCATGGCATTAACGGGTAACGGGGAATTAGGGTTTGATTCCGGAGAGGGAGCCTTAGAAACGGCTACCACATCCAAGGAAGGCAGCAGGCGCGTAAATTACCCAATCCTGACACAGGGAGGTAGTGACAATAAATAACAATGCTCTGGC-----GAGTCGGGCAATTGGAATGAGAACAATTTAAATCCCTTAACGAGGATCAATTGGAGGGCAAGTCTGGTGCCAGCAGCCGCGGTAATTCCAGCTCCAATAGCGTATATTAAAGTTGTTGCAGTTAAAAAGCTCGTAGTTGGATT-T--CTGT-TTTGA-----GC--GTCCG----GTC---------------ACTT----GG---G-----CAT--T-TTTAGGA--T---G----TTTGCCATTAA----------GT---------TG---------------TCGTTTACTGTGAAAAAATTAGAGTGTTTAAAGCAGGCGTT--TGCT-TTGAATACATTAGCATGGAATAATAAGATACGAC---CTTGGTGGTC--TATTTTGTTGGTTTGCACACCA-GGG-TAATGATTAATAGGGACAGTTGGGGGTATTCATATTTCAGCGTCAGAGGTGAAATTCTTGGATCGCTGAAAGATGAGCTTAGGCGAAAGCATTTACCAAGGATGTTTTCATTAATCAAGAACGAAAGTTAGGGGATCGAAGATGATTAGATACCATCGTAGTCTTAACCATAAACTATGCCGACTCGGGATTGGCAGTCGTTA-----ATGA--CCTTGTCAGCACCGTATGAGAAATCAAAGTCTTTGGGTTCCGGGGGGAGTATGGTCGCAAGGCT------------------------------------------------------------------------------------------------------------------------------------------------------------------------------------------------------------------------------------------------------------------------------------------------------------------------------------------------------------------------------------------------------------------------------------------------------------------------------------------------------------------------------------------------------------------------------------------------------------------------------------------------
>Lagenidium_giganteum
---TAGCATTTATTAGATTGAAACCAAT-G--CTCGGG-GGTATTGT-GTTGAGTCATAATAACTGTGCG----G-AC----------CGGCGGTAAATCGATTGAGTTTCTGCCCTATCAGCTTTGGATGGTAGGATATGGGCCTACCATGGCATTAACGGGTAACGGGGAATTAGGGTTTGATTCCGGAGAGGGAGCCTTAGAAACGGCTACCACATCCAAGGAAGGCAGCAGGCGCGTAAATTACCCAATCCTGACACAGGGAGGTAGTGACAATAAATAACAATGCTCTGGC-----GAGTCGGGCAATTGGAATGAGAACAATTTAAATCCCTTATCGAGGATCAATTGGAGGGCAAGTCTGGTGCCAGCAGCCGCGGTAATTCCAGCTCCAATAGCGTATATTAAAGTTGTTGCAGTTAAAAAGCTCGTAGTTGGATT-T--CTGG-TTTGA-----GC--GTCCG----GTC---------------ACTA----AG---C-----CAT--T-TTTAGGA--T---G----TTTGCCATTAA----------GT---------TG---------------TCGTTTACTGTGAAAAAATTAGAGTGTTTAAAGCAGGCGTT--TGCT-TTGAATACATTAGCATGGAATAATAAGATACGAC---CTTGGTGGTC--TATTTTGTTGGTTTGCACACCA-GGG-TAATGATTAATAGGGACAGTTGGGGGTATTCATATTTCAACGTCAGAGGTGAAATTCTTGGATCGTTGAAAGATGAGCTTAGGCGAAAGCATTTACCAAGGATGTTTTCATTAATCAAGAACGAAAGTTAGGGGATCGAAGATGATTAGATACCATCGTAGTCTTAACCATAAACTATGCCGACTCGGGATTGGCAGTCGTTA-----ATGA--CCTTGTCAGCACCGTATGAGAAATCAAAGTCTTTGGGTTCCGGGGGGAGTATGGTCGCAAGGCT------------------------------------------------------------------------------------------------------------------------------------------------------------------------------------------------------------------------------------------------------------------------------------------------------------------------------------------------------------------------------------------------------------------------------------------------------------------------------------------------------------------------------------------------------------------------------------------------------------------------------------------------
>Lagenidium_caudatum
---TAGCATTTATTAGATTGAAACCAAT-G--CTCGGG-GGTATTGT-GTTGAGTCATAATAACTGTGCG----G-AT----------CGGCGATAAATCGATTGAGTTTCTGCCCTATCAGCTTTGGATGGTAGGATATGGGCCTACCATGGCATTAACGGGTAACGGGGAATTAGGGTTTGATTCCGGAGAGGGAGCCTTAGAAACGGCTACCACATCCAAGGAAGGCAGCAGGCGCGTAAATTACCCAATCCTGACACAGGGAGGTAGTGACAATAAATAACAATGCTCTGGC-----GAGTCGGGCAATTGGAATGAGAACAATTTAAATCCCTTAACGAGGATCAATTGGAGGGCAAGTCTGGTGCCAGCAGCCGCGGTAATTCCAGCTCCAATAGCGTATATTAAAGTTGTTGCAGTTAAAAAGCTCGTAGTTGGATT-T--CTGG-TTTGA-----GC--GTCCG----GTC---------------ACTA----AG---C-----CAT--T-TTTAGGA--T---G----TTTGCCATTAA----------GT---------TG---------------TCGTTTACTGTGAAAAAATTAGAGTGTTTAAAGCAGGCGTT--TGCT-TTGAATACATTAGCATGGAATAATAAGATACGAC---CTTGGTGGTC--TATTTTGTTGGTTTGCACACCA-GGG-TAATGATTAATAGGGACAGTTGGGGGTATTCATATTTCAGCGTCAGAGGTGAAATTCTTGGATCGCTGAAAGATGAGCTTAGGCGAAAGCATTTACCAAGGATGTTTTCATTAATCAAGAACGAAAGTTAGGGGATCGAAGATGATTAGATACCATCGTAGTCTTAACCATAAACTATGCCGACTCGGGATTGGCAGTCGTTA-----ATGA--CCTTGTCAGCACCGTATGAGAAATCAAAGTCTTTGGGTTCCGGGGGGAGTATGGTCGCAAGGCT------------------------------------------------------------------------------------------------------------------------------------------------------------------------------------------------------------------------------------------------------------------------------------------------------------------------------------------------------------------------------------------------------------------------------------------------------------------------------------------------------------------------------------------------------------------------------------------------------------------------------------------------
>Olpidiopsis_palmariae
---TTGCATTTATTAGATTGAAACCAAT-C--TTTGTG-GGTATTGA-GTTGAGTCATAATAACTGTGCG----G-AT----------CGGCGATGAATCAATTGAGTTTCTGCCCTATCAGCTTTGGATGGTAGGATATGGGCCTACCATGGCATTAACGGGTAACGGGGAATTAGGGTTTGATTCCGGAGAGGGAGCCTGAGAAACGGCTACCACATCCAAGGAAGGCAGCAGGCGCGTAAATTACCCAATTCTGACACAGAGAGGTAGTGACAATAAATAACAATGCCGGGCT-----AAGTCTGGCAATTGGAATGAGAACAATTTAAATCCCTTAACGAGGATCAATTGGAGGGCAAGTCTGGTGCCAGCAGCCGCGGTAATTCCAGCTCCAATAGCGTATATTAAAGTTGTTGCAGTTAAAAAGCTCGTAGTTGGATT-T--CTGT-TTTGA-----AT--TTCCG----GTC---------------AC------TT---T-----CA---T-TTTAGAC--T---G-----TTGACATTCA----------GT---------TG---------------TCGTTTACTGTGAAAAAATTAGAGTGTTTAAAGCAGGCGTT--CGCT-TTGAATACATTAGCATGGAATAATAAAATATGAC---CTTGGTGGTC--TATTTTGTTGGTTTGCACACCA-GGG-TAATGATTAATAGGGACAGTTGGGGGTATTCATATTTCAGCGTCAGAGGTGAAATTCTTGGATCGCTGAAAGATGAGCTTAGGCGAAAGCATTTATCATGGATGTTTTCATTAATCAAGAACGAAAGTTAGGGGATCGAAGATGATTAGATACCATCGTAGTCTTAACCATAAACTATGCCGACTCGGGATTGGCAGTCGTTA-----ATGA--CTCTGTCAGCACCGTATGAGAAATCAAAGTCTTTGGGTTCCGGGGGGAGTATGGTCGC-AGGCT------------------------------------------------------------------------------------------------------------------------------------------------------------------------------------------------------------------------------------------------------------------------------------------------------------------------------------------------------------------------------------------------------------------------------------------------------------------------------------------------------------------------------------------------------------------------------------------------------------------------------------------------
>Olpidiopsis_feldmanni
---TAGCATTTATTAGATTGAAACCTT--C--TTTG---GAAGTTGT-GTTGAGTCATAATAACTGTGCG----G-AT----------CGGCGATGAATCAATTGAGTTTCTGCCCTATCAGCTTTGGATGGTAAGATATGGGCTTACCATGGCATTAACGGGTAACGGGGAATTAGGGTTTGATTCCGGAGAGGGAGCCTTAGAAACGGCTACCACATCCAAGGAAGGCAGCAGGCGCGTAAATTACCCAATATCAATTCGATGAGGTAGTGACAATAAATAACAATGCCGGGCT-----AAGTCTGGCAATTGGAATGAGAACAATTTAAATCCCTTAACGAGGATCAATTGGAGGGCAAGTCTGGTGCCAGCAGCCGCGGTAATTCCAGCTCCAATAGCGTATATTAAAGTTGTTGCAGTTAAAAAGCTCGTAGTTGGATT-T--CTGT-TTTTA-----AT--TACCG----GTC---------------AC------TT---T-----CA---T--TTAGGA--T---C----CTTAGCATTAA----------GT---------TG---------------TCTTTTACTGTGAAAAAATTAGAGTGTTTAAAGCAGGCGTT--CGCC-TTGAATACATTAGCATGGAATAATAAGATACGAC---TTGTGTTGTC--TATTTTGTTGGTTTGCACACGC-GAG-TAATGATTAATAGGGACAGTTGGGGGTATTCATATTTCAGCGTCAGAGGTGAAATTCTTGGATCGCTGAAAGATGAGCTTAGGCGAAAGCATTTACCATGGATGTTTTCATTAATCAAGAACGAAAGTTAGGGGATCGAAGATGATTAGATACCATCGTAGTCTTAACCATAAACTATGCCGACTCGGGATTGGCAGTCGTTA-----ATGA--CCTTGTCAGCACCGTATGAGAAATCAAAGTCTTTGGGTTCCGGGGGGAGTATGGTCGC-AGGCT------------------------------------------------------------------------------------------------------------------------------------------------------------------------------------------------------------------------------------------------------------------------------------------------------------------------------------------------------------------------------------------------------------------------------------------------------------------------------------------------------------------------------------------------------------------------------------------------------------------------------------------------
>Olpidiopsis_muelleri
---TAGCATTTATTAGATTTAAACCTT--C--TTTG---GAAGTTGT-GTTGAGTCATAATAACTGTGCG----G-AT----------CGGCGATGAATCAATTGAGTTTCTGCCCTATCAGCTTTGGATGGTAGGATATGGGCCTACCATGGCATTAACGGGTAACGGGGAATTAGGGTTTGATTCCGGAGAGGGAGCCTTAGAAACGGCTACCACATCCAAGGAAGGCAGCAGGCGCGTAAATTACCCAATCCTGACACAGGGAGGTAGTGACAATAAATAACAATGCCGGGCT-----AAGTCTAGCAATTGGAATGAGAACAATTTAAATCCCTTAACGAGGATCAATTGGAGGGCAAGTCTGGTGCCAGCAGCCGCGGTAATTCCAGCTCCAATAGCGTATATTAAAGTTGTTGCAGTTAAAAAGCTCGTAGTTGGATT-T--CTGT-TTTTA-----GT--TACCG----GTC---------------AC------TT---T-----CA---T-TTTAGGA--T---C----CTTGGCATTAA----------GT---------TG---------------TCTTTTACTGTGAAAAAATTAGAGTGTTTAAAGCAGGCGTT--CGCT-TTGAATACATTAGCATGGAATAATAAGATACGAC---TTGTGTGGTC--TATTTTGTTGGTTTGCACACGC-GAG-TAATGATTAATAGGGACAGTTGGGGGTATTCATATTTCAGCGTCAGAGGTGAAATTCTTGGATCGCTGAAAGATGAGCTTAGGCGAAAGCATTTACCATGGATGTTTTCATTAATCAAGAACGAAAGTTAGGGGATCGAAGATGATTAGATACCATCGTAGTCTTAACCATAAACTATGCCGACTCGAGATTGGCAGTCGTTA-----ATGA--CCTTGTCAGCATCGTATGAGAAATCAAAGTCTTTGGGTTCCGGGGGGAGTATGGTCGC-AGGCT------------------------------------------------------------------------------------------------------------------------------------------------------------------------------------------------------------------------------------------------------------------------------------------------------------------------------------------------------------------------------------------------------------------------------------------------------------------------------------------------------------------------------------------------------------------------------------------------------------------------------------------------
>Chlamydomyzium_sp.
---TAGCATTTATTAGATTGAAACCAAT-G--CTTCGG-GGTATTGT-GTTGAGTCATAATAACTGTGCG----G-AT----------CGGCGATAAATCAATTGAGTTTCTGCCCTATCAGCTTTGGATGGTAGGATATGGGCCTACCATGGCGTTAACGGGTAACGGGGAATTAGGGTTTGATTCCGGAGAGGGAGCCTTAGAAACGGCTACCACATCCAAGGAAGGCAGCAGGCGCGTAAATTACCCAATCCTGACACAGGGAGGTAGTGACAATAAATAACAATGCCGCGC------AAGTCTGGCAATTGGAATGAGAACAATTTAAATCCCTTAACGAGGATCAATTGGAGGGCAAGTCTGGTGCCAGCAGCCGCGGTAATTCCAGCTCCAATAGCGTATATTAAAGTTGTTGCAGTTAAAAAGCTCGTAGTTGGATT-T--CTGA-TTTGA-----AC--GTCCG----GTC---------------AC------TA---T-----CA---T-TTTAGGA--T---G----CCTGCCATTAA----------GT---------TG---------------TCGTTTACTGTGAAAAAATTAGAGTCTTTAAAGCAGGCGTT--TGCT-TTGAATACATTAGCATGGAATAATAAGATACGAC---CTTGGTGGTC--TATTTTGTTGGTTTGCACACCA-GGG-TAATGATTAATAGGGACAGTTGGGGGTATTCATATTTCAGCGTCAGAGGTGAAATTCTTGGATCGCTGAAAGATGAGCTTAGGCGAAAGCATTTACCAAGGATGTTTTCATTAATCAAGAACGAAAGTTAGGGGATCGAAGATGATTAGATACCATCGTAGTCTTAACCATAAACTATGCCGACTCGGGATTGGCAGTCGTTA-----ATGA--CCTTGTCAGCACCGTATGAGAAATCAAAGTCTTTGGGTTCCGGGGGGAGTATGGTCGC-AGGCT------------------------------------------------------------------------------------------------------------------------------------------------------------------------------------------------------------------------------------------------------------------------------------------------------------------------------------------------------------------------------------------------------------------------------------------------------------------------------------------------------------------------------------------------------------------------------------------------------------------------------------------------
>Aquastella_attenuata
---TAGCATTTATTAGAATGAAACCAAT-T--CTTCGG-GATATTGT-GTTGAATCATAATAACTGTGCG----G-AT----------CGGCGATAAGTCGATTGAGTTTCTGCCCTATCAGCTTTGGATGGTAGGATATGGGCCTACCATGGCGTTAACGGGTAACGGGGAATTAGGGTTTGATTCCGGAGAGGGAGCCTTAGAAACGGCTACCACATCCAAGGAAGGCAGCAGGCGCGTAAATTACCCAATCCTGACACAGGGAGGTAGTGACAATAAATAACAATGTCGGGCT-----TAGTCTGACAATTGGAATGAGTACAATTTAAATCCCTTAACGAGGATCAATTGGAGGGCAAGTCTGGTGCCAGCAGCCGCGGTAATTCCAGCTCCAATAGCGTATATTAAAGTTGTTGCAGTTAAAAAGCTCGTAGTTGGATT-T--CTGG-TTTGA-----GC--ATCCG----GTC---------------ACT-----TG---C-----CAT--T-ATTAGGA--T---A----TGTGCCATTGA----------GT---------TG---------------TCGTTTACTGTGAAAAAATTAGAGTGTTTAAAGCAGGCGTT--TGCT-TTGAATACATTAGCATGGAATAATAAGATACGAC---CTTGGT--CT--TATTTTGTTGGTTTGCATACCA-GGG-TAATGATTAATAGGGACAGTTGGGGGTATTCATATTTCAACGTCAGAGGTGAAATTCTTGGATCGTTGAAAGATGAGCTTAGGCGAAAGCATTTACCAAGGATGTTTTCATTAATCAAGAACGAAAGTCAGGGGATCGAAGATGATTAGATACCATCGTAGTCTTGACCATAAACTATGCCGACTCGGGATTGGCAGTCGTTA-----ATGA--CCTTGTCAGCACCGTATGAGAAATCAAAGTCTTTGGGTTCCGGGGGGAGTATGGTCGC-AGGCT------------------------------------------------------------------------------------------------------------------------------------------------------------------------------------------------------------------------------------------------------------------------------------------------------------------------------------------------------------------------------------------------------------------------------------------------------------------------------------------------------------------------------------------------------------------------------------------------------------------------------------------------
>Aphanomyces_astaci
---UAGCAUUUAUUAGAUUGAAACCAAU-U--CUUCGG-GAUUUUGU-GUUGAAUCAUAAUAACUGUGCU----G-AU----------CGGCGAUAAGUCGAUUGAGUUUCUGCCCUAUCAGCUUUGGAUGGUAGGAUAUGGGCCUACCAUGGCGUUAACGGGUAACGGGGAAUUAGGGUUUGAUUCCGGAGAGGGAGCCUUAGAAACGGCUACCACAUCCAAGGAAGGCAGCAGGCGCGUAAAUUACCCAAUCCUGACACAGGGAGGUAGUGACAAUAAAUAACAAUGCCGGGCU-----UAGUCUGGCAAUUGGAAUGAGAACAAUUUAAAUCCCUUAACGAGGAUCAAUUGGAGGGCAAGUCUGGUGCCAGCAGCCGCGGUAAUUCCAGCUCCAAUAGCGUAUAUUAAAGUUGUUGCAGUUAAAAAGCUCGUAGUUGGAUU-U--CUGG-UUUGA-----GC--GUCCG----GUC---------------AC------UG---C-----CA---U-AUUAGGA--U---G----CCUGCCAUUGA----------GU---------UG---------------UCGUUUACUGUGAAAAAAUUAGAGUGUUUAAAGCAGGCGUU--UGCU-UUGAAUACAUUAGCAUGGAAUAAUAAGAUACGAC---CUUGGUGGUC--UAUUUUGUUGGUUUGCACGCCA-GGG-UAAUGAUUAAUAGGGACAGUUGGGGGUAUUCAUAUUUCAACGUCAGAGGUGAAAUUCUUGGAUCGUUGAAAGAUGAGCUUAGGCGAAAGCAUUUACCAAGGAUGUUUUCAUUAAUCAAGAACGAAAGUCAGGGGAUCGAAGAUGAUUAGAUACCAUCGUAGUCUUGACCAUAAACUAUGCCGACUCGGGAUUGGCAGUCGUUA-----AUGA--CCUUGUCAGCACCGUAUGAGAAAUCAAAGUCUUUGGGUUCCGGGGGGAGUAUGGUCGC-AGGCU------------------------------------------------------------------------------------------------------------------------------------------------------------------------------------------------------------------------------------------------------------------------------------------------------------------------------------------------------------------------------------------------------------------------------------------------------------------------------------------------------------------------------------------------------------------------------------------------------------------------------------------------
