# Supplementary material for: Novel Widespread Marine Oomycetes Parasitising Diatoms, Including the Toxic Genus Pseudo-nitzschia: Genetic, Morphological, and Ecological Characterisation
Source: Front Microbiol. 2018 Dec 3;9:2918. doi: 10.3389/fmicb.2018.02918 (PMC6286980; doi:10.3389/fmicb.2018.02918)
Supplement: Supplementary file 6 [file Data_Sheet_4.fasta]

>KT257342_(modified)
--------------------------------------------TGTCTCAAAGATTAAGCCATGCATGTCTAAGTATAAGCAACTTTGTACTGTGAAACTGCGAATGGCTCATTATATCAGTTATAGTCTACTCGATAGTACCTTACTACTTGGATAACCGTAGTAATTCTAGAGCTAATACATGCAT-CAATACCCAACTG---CTTGTCGGACGGGTAGCATTTATTAGATTGAAACCAATGCAG---TCTTCGG---GCTGGTATTGTGTTGAATCATAATAACTGTGCGGATCGCT----CTC--GTA------GCGATGMATCGATTGAGTTTCTGCCCTATCAGCTTTGGATGGTAGGATATGGGCCTACCATGGCATTAACGGGTAACGGGGAATTAGGGTTTGATTCCGGAGAGGGAGCCTTAGAAACGGCTACCACATCCAAGGAAGGCAGCAGGCGCGTAAATTACCCAATCCTGACAC-AGGGAGGTAGTGACAATAAATAACAATGCTCTGGCTCTTCGAGTCGGGCAATTGGAATGAGAACAATTTAAATCCCTTAACGAGGATCAATTGGAGGGCAAGTCTGGTGCCAGCAGCCGCGGTAATTCCAGCTCCAATAGCGTATATTAAAGTTGTTGCAGTTAAAAAGCTCGTAGTTGGATTTC--TGGAT-TGATCG---TCCGGTCCGC--TTCCTTTGGGAGTGT--GTAC--TAAG-GATGGTTGG-T-CCATT-TTTTGTGAGGATGTTCTT---CTGCCATTAAGTTGG-TGGTTGAATGGACTTGCA--TCGTTTACTGTGAAAAAATTAGAGTGTTTAAAGCAGGCG-TT--TGC------TTGAATACATTAGCATGGAATAATAAGATACGACTT---TGGTCTATTTTGTTGGTTTGCATA-CCAGAGTAATGATTAATAGGGACAGTT-GGGGGTATTCATATTTCAG-CGTCAGAGGTGAAATTCTTGGATCGCTGAAAGATGAGCTTAGGCGAAAGCATTTACCAAGGATGTTTTCATTAATCAAGAACGAAAGTTAGGGGATCGAAGATGATTAGATACCATCGTAGTCTTAACCATAAACTATGCCGACTCGGGATTGGCAGTCGTT-TA---CTTTAAATGACCTTGTCAGCACCGTATGAGAAATCAAAGTCTTTGGGTTCC-GGGGGGAGTATGGTCGCAAGGCTGAAACTTAAAGGAA--TTGACGGAAGGGCACCACCAGGAGTGGAGCCTGCGGCTTAATTTGACTCAACACGGGAAAACTTACCAGGTCCAGACATAGTAA-GGATTGACAGATTGAGAGCTCTTTCTTGA-TTCTATGGGTGGTGGTGCATGG-CCGTTCTTAGTTGGTG-GAGTGATTTGTCTGGTTAATTCCGTTAACGAACGAGACCTCCGCGTGCTAAATAGTTT-CGCTTAC-CT--TTTTGGTAGGTTTT--GAGACTTCTTAGAGGGACTTTTGGGTAATCAAACCAAAGGAAGTTGGAGGCAATAACAGGTCTGTGATGCCCTTAGACGTTCTGGGCCGCACGCGCGCTACACTGATGCGTTCAACGAGTTTACAACCTTGATCGATAGGTCTGGGTAATCTTCTGAATGCGCATCGTGCTAGGGATAGATTGTTGCAATTTTCAATCTTGAACGAGGAATTCCTAGTAAACGCAAGTCATCAGCTTGCATTGATTACGTCCCTGCCCTTTGTACACACCGCCCGTCGCACCTACCGATTGAATGACTCGGTGAAAAATTGGGACC-------GTGA-------ATCTGTTTGC-TTTATTGCGAATCGATCCGTG-GGAACTTTTTTTAACCTCGCCATTTAGAGGAAGGTGAAGTCGTAACAAGGTTTCCGTAGGTGAACCTGCGGAAGGATCATTA---
>KT257380_(modified)
--------------------------------------------TGTCTCAAAGATTAAGCCATGCATGTCTAAGTATAAGCAACTTTGTACTGTGAAACTGCGAATGGCTCATTATATCAGTTATAGTCTACTCGATAGTACCTTACTACTTGGATAACCGTAGTAATTCTAGAGCTAATACATGCAT-CAATACCCAACTG---CTTGTCGGACGGGTAGCATTTATTAGATTGAAACCAATGCAG---TCTTCGG---GCTGGTATTGTGTTGAATCATAATAACTGTGCGGATCGCT----CTC--GTA------GCGATGAATCGATTGAGTTTCTGCCCTATCAGCTTTGGATGGTAGGATATGGGCCTACCATGGCATTAACGGGTAACGGGGAATTAGGGTTTGATTCCGGAGAGGGAGCCTTAGAAACGGCTACCACATCCAAGGAAGGCAGCAGGCGCGTAAATTACCCAATCCTGACAC-AGGGAGGTAGTGACAATAAATAACAATGCTCTGGCTCTTCGAGTCGGGCAATTGGAATGAGAACAATTTAAATCCCTTAACGAGGATCAATTGGAGGGCAAGTCTGGTGCCAGCAGCCGCGGTAATTCCAGCTCCAATAGCGTATATTAAAGTTGTTGCAGTTAAAAAGCTCGTAGTTGGATTTC--TGGAT-TGATCG---TCCGGTCCGC--TTCCTTTGGGAGTGT--GTAC--TAAG-GATGGTTGG-T-CCATT-TTTTGTGAGGATGTTCTT---CTGCCATTAAGTTGG-TGGTTGAATGGACTTGCA--TCGTTTACTGTGAAAAAATTAGAGTGTTTAAAGCAGGCG-TT--TGCT------TGAATACATTAGCATGGAATAATAAGATACGACTT---TGGTCTATTTTGTTGGTTTGCATA-CCAGGGTAATGATTAATAGGGACAGTT-GGGGGTATTCATATTTCAG-CGTCAGAGGTGAAATTCTTGGATCGCTGAAAGATGAGCTTAGGCGAAAGCATTTACCAAGGATGTTTTCATTAATCAAGAACGAAAGTTAGGGGATCGAAGATGATTAGATACCATCGTAGTCTTAACCATAAACTATGCCGACTCGGGATTGGCAGTCGTT-TA---CTTTAAATGACCTTGTCAGCACCGTATGAGAAATCAAAGTCTTTGGGTTCC-GGGGGGAGTATGGTCGCAAGGCTGAAACTTAAAGGAA--TTGACGGAAGGGCACCACCAGGAGTGGAGCCTGCGGCTTAATTTGACTCAACACGGGAAAACTTACCAGGTCCAGACATAGTAA-GGATTGACAGATTGAGAGCTCTTTCTTGA-TTCTATGGGTGGTGGTGCATGG-CCGTTCTTAGTTGGTG-GAGTGATTTGTCTGGTTAATTCCGTTAACGAACGAGACCTCCGCGTGCTAAATAGTCT-CGCTTAC-C--TTTTTGGTAGGTTTT--GAGACTTCTTAGAGGGACTTTTGGGTAATCAAACCAAAGGAAGTTGGAGGCAATAACAGGTCTGTGATGCCCTTAGACGTTCTGGGCCGCACGCGCGCTACACTGATGCGTTCAACGAGTTTACAACCTTGATCGATAGGTCTGGGTAATCTTTTGAATGCGCATCGTGCTAGGGATAGATTGTTGCAATTTTCAATCTTGAACGAGGAATTCCTAGTAAACGCAAGTCATCAGCTTGCATTGATTACGTCCCTGCCCTTTGTACACACCGCCCGTCGCACCTACCGATTGAATGACTCGGTGAAAAATTGGGACC-------GTGA-------ATCGGTTTGC-TTTATTGCGAATCGATCCGTG-GGAACTTTTTTTAACCTCGCCATTTAGAGGAAGGTGAAGTCGTAACAAGGTTTCCGTAGGTGAACCTGCGGAAGGATCATTA---
>FR832884
ATGAAAGGTATTAACCTGGTTGATCCTGCCAGTAGTCATACGCTTGTCTCAAAGATTAAGCCATGCATGTCTAAGTATAAACAATTTTGTACTGTGAAACTGCGAATGGCTCATTATATCAGTTATAGTCTACTCGATAGTACCTTACTACTTGGATACCCGTAGTAATTCTAGAGCTAATACATGCAA-CAATACCCAACTG---CTTGTCGGGCGGGTAGCATTTATTAGATTGAAACCAATGCAG---CTTTCGG---GCTGGTATTGTGTTGAATCATAATAACTGTGCGGATCGCA----CTT--TTGT-----GCGATAAATCGATTGAGTTTCTGCCCTATCAGCTTTGGATGGTAGGATATGGGCCTACCATGGCATTAACGGGTAACGGGGAATTAGGGTTTGATTCCGGAGAGGGAGCCTTAGAAACGGCTACCACATCCAAGGAAGGCAGCAGGCGCGTAAATTACCCAATCCTGACAC-AGGGAGGTAGTGACAATAAATAACAATGCTCTGGCTCTTCGAGTCGGGCAATTGGAATGAGAACAATTTAAATCCCTTATCGAGGATCAATTGGAGGGCAAGTCTGGTGCCAGCAGCCGCGGTAATTCCAGCTCCAATAGCGTATATTAAAGTTGTTGCAGTTAAAAAGCTCGTAGTTGGATTTC--TGATT-CGAGCG---TCCGGTCCGC--TTCTTTTAGGAGTGT--GTAC--TTTG-GATGCTTGG-A-TCATT-TTTTGCGAGGACGTTTTT---CTGTCATTAGGTTGA-TGGTTAAATGGACTTGCA--TCGTTTACTGTGAAAAAATTAGAGTGTTTAAAGCAGGCG-TT--TGCT---CATTGAATACTTCAGCATGGAATAATAAGATACGACCTTGGTGGTCTATTTTGTTGGTTTGCACA-CCAGGGTAATGATTAATAGGGACAGTT-GGGGGTATTCATATTTCAA-CGTCAGAGGTGAAATTCTTGGATCGTTGAAAGATGAGCTTAGGCGAAAGCATTTACCAAGGATGTTTTCATTAATCAAGAACGAAAGTTAGGGGATCGAAGATGATTAGATACCATCGTAGTCTTAACCATAAACTATGCCGACTCGGGATTGGCAGTCGTT-TA---CTTTAAATGACCTTGTCAGCACCGTATGAGAAATCAAAGTCTTTGGGTTCC-GGGGGGAGTATGGTCGCAAGGCTGAAACTTAAAGGAA--TTGACGGAAGGGCACCACCAGGAGTGGAGCCTGCGGCTTAATTTGACTCAACACGGGAAAACTTACCAGGTCCAGACATAGTAA-GGATTGACAGATTGAGAGCTCTTTCTTGA-TTCTATGGGTGGTGGTGCATGG-CCGTTCTTAGTTGGTG-GAGTGATTTGTCTGGTTAATTCCGTTAACGAACGAGACCTCCGCAT-CTAAATAGTTT-CGCTTAC----ATTTTTGTAGGTTTT--GAGACTTCTTAGAGGGACTTTTGGGTAATCAAACCAAAGGAAGTTGGAGGCAATAACAGGTCTGTGATGCCCTTAGATGTTCTGGGCCGCACGCGCGCTACACTGATGCGTTCAACGAGTTTAAAACCTTGACCGATAGGTCTGGGTAATCTTGTGAATGCGCATCGTGCTAGGGATAGATTGTTGCAATTTTCAATCTTGAACGAGGAATTCCTAGTAAATGCAAGTCATCAGCTTGCGTTGATTACGTCCCTGCCCTTTGTACACACCGCCCGTCGCACCTACCGATTGAATGACTCGGTGAAGAATTGGGACC-------GTGA-------ATCTGTTTGC-TTCATTGCGAATGGATTTGTG-GGAACTTTTTTTAACCTCGCCATTTAGAGGAAGGTGAAGTCGTAACAAGGTTTCCGTAGGTGAACCTGCGGAAGGATCATTA---
>KM402874
---------------------------------------------------------------TGCATGTCTAAGTATAAACAATTTTGTACTGTGAAACTGCGAATGGCTCATTATATCAGTTATAGTCTACTCGATAGTACCTTACTACTTGGATAACCGTAGTAATTCTAGAGCTAATACATGCGC-AAATACCCAACTG---CTGGTCGGACGGGTAGCATTTATTAGATTGAAACCAATGCAG---TCTTCGG---GCTGGTATTGTGTTGAGTCATAATAACTGTGCGGATCGCA----CTT--TTGT-----GCGATAAATCGATTGAGTTTCTGCCCTATCAGCTTTGGATGGTAGGATATGGGCCTACCATGGCATTAACGGGTAACGGGGAATTAGGGTTTGATTCCGGAGAGGGAGCCTTAGAAACGGCTACCACATCCAAGGAAGGCAGCAGGCGCGTAAATTACCCAATCCTGACAC-AGGGAGGTAGTGACAATAAATAACAATGCTCTGGCTCTTCGAGTCGGGCAATTGGAATGAGAACAATTTAAATCCCTTATCGAGGATCAATTGGAGGGCAAGTCTGGTGCCAGCAGCCGCGGTAATTCCAGCTCCAATAGCGTATATTAAAGTTGTTGCAGTTAAAAAGCTCGTAGTTGGATTTC--TGGTT-TGAGCG---TCCGGTCCGC--TCCTTT--GGAGTGT--GTAC--TAAG-GATGCTTGA-G-CCATT-TTTTGTGAGGACGTTCTT---CTGCCATTAAGTTGG-TGGTTGGATGGACTTGCA--TCGTTTACTGTGAAAAAATTAGAGTGTTTAAAGCAGGCG-TT--TGCT---CATTGAATACATTAGCATGGAATAATAAGATACGACCTTGGTGGTCTATTTTGTTGGTTTGCACA-CCAGGGTAATGATTAATAGGGACAGTT-GGGGGTATTCATATTTCAA-CGTCAGAGGTGAAATTCTTGGATCGTTGAAAGATGAGCTTAGGCGAAAGCATTTACCAAGGATGTTTTCATTAATCAAGAACGAAAGTTAGGGGATCGAAGATGATTAGATACCATCGTAGTCTTAACCATAAACTATGCCGACTCGGGATTGGCAGTCGTT-TA----TTTAAATGACCTTGTCAGCACCGTATGAGAAATCAAAGTCTTTGGGTTCC-GGGGGGAGTATGGTCGCAAGGCTGAAACTTAAAGGAA--TTGACGGAAGGGCACCACCAGGAGTGGAGCCTGCGGCTTAATTTGACTCAACACGGGGAAACTTACCAGGTCCAGACATAGTAA-GGATTGACAGATTGAGAGCTCTTTCTTGA-TTCTATGGGTGGTGGTGCATGG-CCGTTCTTAGTTGGTG-GAGTGATTTGTCTGGTTAATTCCGTTAACGAACGAGACCTCCGCGTGCTAAATAGTTC-AGCTTAC-AA--TTTTTGTAGGTG----CGAACTTCTTAGAGGGACTTTTGGGTAATCAAACCAAAGGAAGTTGGAGGCAATAACAGGTCTGTGATGCCCTTAGATGTTCTGGGCCGCACGCGCGCTACACTGATGCGTTCAACGAGTATACAACCTTGATCGATAGGTCTGGGTAATCTTGTAAATGCGCATCGTGCTAGGGATAGATTGTTGCAATTTTCAATCTTGAACGAGGAATTCCTAGTAAACGCAAGTCATCAGCTTGCATTGATTACGTCCCTGCCCTTTGTACACACCGCCCGTCGCACCTACCGATTGAATGACTCGGTGAAAAATTGGGACC-------GTGA-------GCCTGCTTGC-TTTATTGCGAGTGGATTTATG-GGAACTTTTTTTAACCTCGCCATTTAGAG--------------------------------------------------------
>AB284571
-------------------------------GTAGTCATACGCTTGTCTCAAAGATTAAGCCATGCATGTCTAAGTATAAACAATTTTGTACTGTGAAACTGCGAATGGCTCATTATATCAGTTATAGTCTACTCGATAGTACCTTACTACTTGGATAACCGTAGTAATTCTAGAGCTAATACATGCGC-AAATACCCAACTG---CTTGTCGGAAGGGTAGCATTTATTAGATTGAAACCAATGCAG---TCTTCGG---GCTGGTGTTGTGTTGAGTCATAATAACTGTGCGGATCGCA----CTT--TTGT-----GCGATAAATCGATTGAGTTTCTGCCCTATCAGCTTTGGATGGTAGGATATGGGCCTACCATGGCATTAACGGGTAACGGGGAATTAGGGTTTGATTCCGGAGAGGGAGCCTTAGAAACGGCTACCACATCCAAGGAAGGCAGCAGGCGCGTAAATTACCCAATCCTGACAC-AGGGAGGTAGTGACAATAAATAACAATGCTCTGGCTCTTCGAGTCGGGCAATTGGAATGAGAACAATTTAAATCCCTTATCGAGGATCAATTGGAGGGCAAGTCTGGTGCCAGCAGCCGCGGTAATTCCAGCTCCAATAGCGTATATTAAAGTTGTTGCAGTTAAAAAGCTCGTAGTTGGATTTC--TGGTT-TGAGCG---TCCGGTCCGC--TTCCTCTGGAAGTGT--GTAC--TAAG-GATGTTTGA-G-CCATT-TTTTGTGAGGACGTTTTT---CTGTCATTAAGTTGA-TGGTTGAATGGACTTGCA--TCGTTTACTGTGAAAAAATTAGAGTGTTTAAAGCAGGCG-TT--TGCT---CATTGAATACATTAGCATGGAATAATAAGATACGACCTTGGTGGTCTATTTTGTTGGTTTGCACA-CCAGGGTAATGATTAATAGGGACAGTT-GGGGGTATTCATATTTCAA-CGTCAGAGGTGAAATTCTTGGATCGTTGAAAGATGAGCTTAGGCGAAAGCATTTACCAAGGATGTTTTCATTAATCAAGAACGAAAGTTAGGGGATCGAAGATGATTAGATACCATCGTAGTCTTAACCATAAACTATGCCGACTCGGGATTGGCAGTCGTT-TA----TTTAAATGACCTTGTCAGCACCGTATGAGAAATCAAAGTCTTTGGGTTCC-GGGGGGAGTATGGTCGCAAGGCTGAAACTTAAAGGAA--TTGACGGAAGGGCACCACCAGGAGTGGAGCCTGCGGCTTAATTTGACTCAACACGGGAAAACTTACCAGGTCCAGACATAGTAA-GGATTGACAGATTGAGAGCTCTTTCTTGA-TTCTATGGGTGGTGGTGCATGG-CCGTTCTTAGTTGGTG-GAGTGATTTGTCTGGTTAATTCCGTTAACGAACGAGACCTCCGCGTGCTAAATAGTTC-CACTTAC-AA--TTTTTGTAGGTGT---TGGACTTCTTAGAGGGACTTTTGGGTAATCAAACCAAAGGAAGTTGGAGGCAATAACAGGTCTGTGATGCCCTTAGATGTTCTGGGCCGCACGCGCGCTACACTGATGCGTTCAACGAGTTTACAACCTTGATCGATAGGTCTGGGTAATCTTGTAAATGCGCATCGTGCTAGGGATAGATTGTTGCAATTTTCAATCTTGAACGAGGAATTCCTAGTAAACGCAAGTCATCAGCTTGCATTGATTACGTCCCTGCCCTTTGTACACACCGCCCGTCGCACCTACCGATTGAATGACTCGGTGAAAAATTGGGACC-------GTGA-------GCCTGCTTGC-TTTATTGCGAGTGGATTTATG-GGAACTTTTTTTAACCTCGCCATTTAGAGGAAGGTGAAGTCGTAACAAGGTTTCCGTAGGTGAACCTGCGGA-------------
>KF915307_(modified)
--------------------------------------------TGTCTCAAAGATTAAGCCATGCATGTCTAAGTATAAACAACTTTGTACTGTGAAACTGCGAATGGCTCATTATATCAGTTATAGTCTACTCGATAGTACCTTACTACTTGGATAACCGTAGTAATTCTAGAGCTAATACATGCGC-AAATACCCAACTG---CTTGTCGGACGGGTAGCATTTATTAGATTGAAACCAATGCAG---TCTTCGG---GCTGGTATTGTGTTGAGTCATAATAACTGTGCGGACCGCA----CTT--TTGT-----GCGGTAAATCGATTGAGTTTCTGCCCTATCAGCTTTGGATGGTAGGATATGGGCCTACCATGGCATTAACGGGTAACGGGGAATTAGGGTTTGATTCCGGAGAGGGAGCCTTAGAAACGGCTACCACATCCAAGGAAGGCAGCAGGCGCGTAAATTACCCAATCCTGACAC-AGGGAGGTAGTGACAATAAATAACAATGCTCTGGCTCTTCGAGTCGGGCAATTGGAATGAGAACAATTTAAATCCCTTATCGAGGATCAATTGGAGGGCAAGTCTGGTGCCAGCAGCCGCGGTAATTCCAGCTCCAATAGCGTATATTAAAGTTGTTGCAGTTAAAAAGCTCGTAGTTGGATTTC--TGGTT-TGAGCG---TCCGGTCCGC--TTCCTCTGGAAGTGC--GTAC--TAAG-GATGTTTGA-G-CCATT-TTTTGTGAGGATGTTCTT---CTGCCATTAGGTTGG-TGGTTGAATGGACTTGCA--TCGTTTACTGTGAAAAAATTAGAGTGTTTAAAGCAGGCG-TT--TGCT---CATTGAATACATTAGCATGGAATAATAAGATACGACCTTGGTGGTCTATTTTGTTGGTTTGCACA-CCAGGGTAATGATTAATAGGGACAGTT-GGGGGTATTCATATTTCAA-CGTCAGAGGTGAAATTCTTGGATCGTTGAAAGATGAGCTTAGGCGAAAGCATTTACCAAGGATGTTTTCATTAATCAAGAACGAAAGTTAGGGGATCGAAGATGATTAGATACCATCGTAGTCTTAACCATAAACTATGCCGACTCGGGATTGGCAGTCGTT-TA---ATTTAAATGACCTTGTCAGCACCGTATGAGAAATCAAAGTCTTTGGGTTCC-GGGGGGAGTATGGTCGCAAGGCTGAAACTTAAAGGAA--TTGACGGAAGGGCACCACCAGGAGTGGAGCCTGCGGCTTAATTTGACTCAACACGGGGAAACTTACCAGGTCCAGACATAGTAA-GGATTGACAGATTGAGAGCTCTTTCTTGA-TTCTATGGGTGGTGGTGCATGG-CCGTTCTTAGTTGGTG-GAGTGATTTGTCTGGTTAATTCCGTTAACGAACGAGACCTCCGCGTGCTAAATAGTCT-CGCTTAC-AA--TTTTTGTAGGTTTT--GAGACTTCTTAGAGGGACTTTTGGGTAATCAAACCAAAGGAAGTTGGAGGCAATAACAGGTCTGTGATGCCCTTAGATGTTCTGGGCCGCACGCGCGCTACACTGATGCGTTCAACGAGTTTATAACCTTGATCGATAGGTCTGGGTAATCTTTTGAATGCGCATCGTGCTAGGGATAGATTGTTGCAATTTTCAATCTTGAACGAGGAATTCCTAGTAAACGCAAGTCATCAGCTTGCATTGATTACGTCCCTGCCCTTTGTACACACCGCCCGTCGCACCTACCGATTGAATGACTCGGTGAAAAATTGGGACT-------GTGA-------ACTCGTTTGC-TTTATTGCGAATGAGTTTGTG-GGAACTTTTTTTAACCTCGCCATTTAGAGGAAGGTGAAGTCGTAACAAGGTTTCCGTAGGTGAACCTGCGGAAGGATCATTA---
>EU271961_1
------------------------------------------------------------------------------AAACAATTTTGTACTGTGAAACTGCGAATGGCTCATTATATCAGTTATAGTCTACTCGATAGTACCTTACTACTTGGATAACCGTAGTAATTCTAGAGCTAATACATGCGC-AAATACCCAACTG---CTTGTCGGACGGGTAGCATTTATTAGATTGAAACCAATGCAG---TCTTCGG---GCTGGTATTGTGTTGAGTCATAATAACTGTGCGGATCGCA----CTT--TTGT-----GCGATAAATCGATTGAGTTTCTGCCCTATCAGCTTTGGATGGTAGGATATGGGCCTACCATGGCATTAACGGGTAACGGGGAATTAGGGTTTGATTCCGGAGAGGGAGCCTTAGAAACGGCTACCACATCCAAGGAAGGCAGCAGGCGCGTAAATTACCCAATCCTGACAC-AGGGAGGTAGTGACAATAAATAACAATGCTCTGGCTCTTCGAGTCGGGCAATTGGAATGAGAACAATTTAAATCCCTTAACGAGGATCAATTGGAGGGCAAGTCTGGTGCCAGCAGCCGCGGTAATTCCAGCTCCAATAGCGTATATTAAAGTTGTTGCAGTTAAAAAGCTCGTAGTTGGATTTC--TGGTT-TGAGCG---TCCGGTCCGC--TTCCTCTGGAAGTGT--GTAC--TAAG-GATGTTTGA-G-CCATT-TTTTGTGAGGATGTTCTT---CTGCCATTAAGTTGG-TGGTTGAATGGACTTGCA--TCGTTTACTGTGAAAAAATTAGAGTGTTTAAAGCAGGCG-TT--TGCT---CATTGAATACATTAGCATGGAATAATAAGATACGACCTTGGTGGTCTATTTTGTTGGTTTGCACA-CCAGGGTAATGATTAATAGGGACAGTT-GGGGGTATTCATATTTCAG-CGTCAGAGGTGAAATTCTTGGATCGCTGAAAGATGAGCTTAGGCGAAAGCATTTACCAAGGATGTTTTCATTAATCAAGAACGAAAGTTAGGGGATCGAAGATGATTAGATACCATCGTAGTCTTAACCATAAACTATGCCGACTCGGGATTGGCAGTCGTT-TA---ATTTAAATGACCTTGTCAGCACCGTATGAGAAATCAAAGTCTTTGGGTTCC-GGGGGGAGTATGGTCGCAAGGCTGAAACTTAAAGGAA--TTGACGGAAGGGCACCACCAGGAGTGGAGCCTGCGGCTTAATTTGACTCAACACGGGAAAACTTACCAGGTCCAGACATAGTAA-GGATTGACAGATTGAGAGCTCTTTCTTGA-TTCTATGGGTGGTGGTGCATGG-CCGTTCTTAGTTGGTG-GAGTGATTTGTCTGGTTAATTCCGTTAACGAACGAGACCTCCGCGTGCTAAATAGTTT-CGCTTAC-AA-TTTTTTGTAGGTTTT--GAGACTTCTTAGAGGGACTTTTGGGTAATCAAACCAAAGGAAGTTGGAGGCAATAACAGGTCTGTGATGCCCTTAGATGTTCTGGGCCGCACGCGCGCTACACTGATGCGTTCAACGAGTTTACAACCTTGATCGATAGGTCTGGGTAATCTTTTGAATGCGCATCGTGCTAGGGATAGATTGTTGCAATTTTCAATCTTGAACGAGGAATTCCTAGTAAACGCAAGTCATCAGCTTGCATTGATTACGTCCCTGCCCTTTGTACACACCGCCCGTCGCACCTACCGATTGAATGACTCGGTGAAAAATTGGGACT-------GTGA-------GTCCGTTTGC-TTTATTGCGAGTGGATTTACG-GAAACTTTTTTTAACCTCGCCATTT------------------------------------------------------------
>EU271961_2
------------------------------------------------------------------------------AAACAATTTTGTACTGTGAAACTGCGAATGGCTCATTATATCAGTTATAGTCTACTCGATAGTACCTTACTACTTGGATAACCGTAGTAATTCTAGAGCTAATACATGCGC-AAATACCCAACTG---CTTGTCGGACGGGTAGCATTTATTAGATTGAAACCAATGCAG---TCTTCGG---GCTGGTATTGTGTTGAGTCATAATAACTGTGCGGATCGCA----CTT--TTGT-----GCGATAAATCGATTGAGTTTCTGCCCTATCAGCTTTGGATGGTAGGATATGGGCCTACCATGGCATTAACGGGTAACGGGGAATTAGGGTTTGATTCCGGAGAGGGAGCCTTAGAAACGGCTACCACATCCAAGGAAGGCAGCAGGCGCGTAAATTACCCAATCCTGACAC-AGGGAGGTAGTGACAATAAATAACAATGCTCTGGCTCTTCGAGTCGGGCAATTGGAATGAGAACAATTTAAATCCCTTAACGAGGATCAATTGGAGGGCAAGTCTGGTGCCAGCAGCCGCGGTAATTCCAGCTCCAATAGCGTATATTAAAGTTGTTGCAGTTAAAAAGCTCGTAGTTGGATTTC--TGGTT-TGAGCG---TCCGGTCCGC--TTCCTCTGGAAGTGT--GTAC--TAAG-GATGTTTGA-G-CCATT-TTTTGTGAGGATGTTCTT---CTGCCATTAAGTTGG-TGGTTGAATGGACTTGCA--TCGTTTACTGTGAAAAAATTAGAGTGTTTAAAGCAGGCG-TT--TGCT---CATTGAATACATTAGCATGGAATAATAAGATACGACCTTGGTGGTCTATTTTGTTGGTTTGCACA-CCAGGGTAATGATTAATAGGGACAGTT-GGGGGTATTCATATTTCAG-CGTCAGAGGTGAAATTCTTGGATCGCTGAAAGATGAGCTTAGGCGAAAGCATTTACCAAGGATGTTTTCATTAATCAAGAACGAAAGTTAGGGGATCGAAGATGATTAGATACCATCGTAGTCTTAACCATAAACTATGCCGACTCGGGATTGGCAGTCGTT-TA---ATTTAAATGACCTTGTCAGCACCGTATGAGAAATCAAAGTCTTTGGGTTCC-GGGGGGAGTATGGTCGCAAGGCTGAAACTTAAAGGAA--TTGACGGAAGGGCACCACCAGGAGTGGAGCCTGCGGCTTAATTTGACTCAACACGGGAAAACTTACCAGGTCCAGACATAGTAA-GGATTGACAGATTGAGAGCTCTTTCTTGA-TTCTATGGGTGGTGGTGCATGG-CCGTTCTTAGTTGGTG-GAGTGATTTGTCTGGTTAATTCCGTTAACGAACGAGACCTCCGCGTGCTAAATAGTTT-CGCTTAC-AA-TTTTTTGTAGGTTTT--GAGACTTCTTAGAGGGACTTTTGGGTAATCAAACCAAAGGAAGTTGGAGGCAATAACAGGTCTGTGATGCCCTTAGATGTTCTGGGCCGCACGCGCGCTACACTGATGCGTTCAACGAGTTTACAACCTTGATCGATAGGTCTGGGTAATCTTTTGAATGCGCATCGTGCTAGGGATAGATTGTTGCAATTTTCAATCTTGAACGAGGAATTCCTAGTAAACGCAAGTCATCAGCTTGCATTGATTACGTCCCTGCCCTTTGTACACACCGCCCGTCGCACCTACCGATTGAATGACTCGGTGAAAAATTGGGACT-------GTGA-------GTCCGTTTGC-TTTATTGCGAGTGGATTTACG-GAAACTTTTTTTAACCTCGCCATTT------------------------------------------------------------
>KT257367_(modified)
-----------------------------------------GCTTGTCTCAAAGATTAAGCCATGCATGTCTAAGTATAAACAATTTTGTACTGTGAAACTGCGAATGGCTCATTATATCAGTTATAGTCTACTCGATAGTACCTTACTACTTGGATAACCGTAGTAATTCTAGAGCTAATACATGCGC-AAATACCCAACTG---CTTGTCGGGCGGGTAGCATTTATTAGATTGAAACCAATGCAG----CTTCGG----CTGGTATTGTGTTGAGTCATAATAACTGTGCGGATCGCA----CTT--TTGT-----GCGATAAATCGATTGAGTTTCTGCCCTATCAGCTTTGGATGGTAGGATATGGGCCTACCATGGCATTAACGGGTAACGGGGAATTAGGGTTTGATTCCGGAGAGGGAGCCTTAGAAACGGCTACCACATCCAAGGAAGGCAGCAGGCGCGTAAATTACCCAATCCTGACAC-AGGGAGGTAGTGACAATAAATAACAATGCTCTGGCTCTTCGAGTCGGGCAATTGGAATGAGAACAATTTAAATCCCTTAACGAGGATCAATTGGAGGGCAAGTCTGGTGCCAGCAGCCGCGGTAATTCCAGCTCCAATAGCGTATATTAAAGTTGTTGCAGTTAAAAAGCTCGTAGTTGGATTTC--TGGTT-TGAACG---TCCGGTCCGC--TTCCTTTGGAAGTGT--GTAC--TAAG-GATGTTTGA-G-CCATT-TTTTGTGAGGATATTTTT---CTGCCATTAAGTTGG-TGGTTGAATGGACTTGCA--TCGTTTACTGTGAAAAAATTAGAGTGTTTAAAGCAGGCG-TT--TGCT---CACTGAATACATTAACATGGAATAATAAAATACGACCTTGGTGGTCTATTTTGTTGGTTTGCACA-CCAGGGTAATGATTAATAGGGACAGTT-GGGGGTATTCATATTTCAG-CGTCAGAGGTGAAATTCTTGGATCGCTGAAAGATGAGCTTAGGCGAAAGCATTTATCAAGGATGTTTTCATTAATCAAGAACGAAAGTTAGGGGATCGAAGATGATTAGATACCATCGTAGTCTTAACCATAAACTATGCCGACTCGGGATTGGCAGTCGTT-TA---ATTTAAATGACCTTGTCAGCACCGTATGAGAAATCAAAGTCTTTGGGTTCC-GGGGGGAGTATGGTCGCAAGGCTGAAACTTAAAGGAA--TTGACGGAAGGGCACCACCAGGAGTGGAGCCTGCGGCTTAATTTGACTCAACACGGGAAAACTTACCAGGTCCAGACATAGTAA-GGATTGACAGATTGAGAGCTCTTTCTTGA-TTCTATGGGTGGTGGTGCATGG-CCGTTCTTAGTTGGTG-GAGTGATTTGTCTGGTTAATTCCGTTAACGAACGAGACCTCCGCGTGCTAAATAGTTT-TGCTTAC-AA-TTTTTTGTAGGTTTA---AAACTTCTTAGACGGACTTTTGGGTAATCAAACCAAAGGAAGTTGGAGGCAATAACAGGTCTGTGATGCCCTTAGATGTTCTGGGCCGCACGCGCGCTACACTGATGCGTTCAACGAGTTTACAACCTTGATCGATAGGTCTGGGTAATCTTTTGAATGCGCATCGTGCTAGGGATAGATTGTTGCAATTTTCAATCTTGAACGAGGAATTCCTAGTAAACGCAAGTCATCAGCTTGCATTGATTACGTCCCTGCCCTTTGTACACACCGCCCGTCGCACCTACCGATTGAATGACTCGGTGAAAAATTGGGACC-------GTGA-------ATCTGTTTGC-TTTATTGCGAGTGGATTTATA-GAAACTTTTTTTAACCTCGCCATTTAGAGGAAGGTGAAGTCGTAACAAGGTTTCCGTAGGTGAACCTGCGGAAGGATCATTA---
>FM202390.1
-----------------------------------------------------------------------------------------------------------------------------------------------------------------------------------------------------------------------------------------------------------------------------------------------------------------------------------------------------------------------------------------------------------------------------------------------------------------------------------------------------------------------------------------------------------------------------------------------------------------------------------------------------------------------------------------------------------------------------------TTTTTGCATTTGC--GTAC--TATGAAACATCTGT---TCAT--TTTTGTGAGAGAGATTTA---CTGCCATTAATTTGG-TGGTTTATCAATCTTGCA--TCGTTTACTGTGAAAAAATTAGAGTGTTTAAAGCAGGCT-TT--GGCCAAATCTTGAATACATTAGCATGGAATAATAAGATATGACTTTGGTGGTCTATTTTGTTGGTTTGCACA-CCAGAGTAATGATTAATAGGGACAGTT-GGGGGTATTTATATTCCAT-CGTCAGAGGTGAAATTCTTGGATCGATGGAAGATAAACTAATGCGAAAGCATTTATCAAGGATGTTTTCATTAATCAAGAACGAAAGTTAGGGGATCGAAGATGATTAGATACCATCGTAGTCTTAACCATAAACTATGCCGACTCAGGATTGGTAGTTGTT-TA---ATTTTAATGACACTATCAGCACTGTATGAGAAATCAAAGTTTTTGGGTTCC-GGGGGGAGTATGGTCGCAAGGCTGAAACTTAAAGGAA--TTGACGGAAGGGCACCACCAGGAGTGGAGCCTGCGGCTTAATTTGACTCAACACGGGGAAACTTACCAGGTCCAGACATAGTAA-GGATTGACAGATTGAGAGCTCTTTCTTGA-TTCTATGGGTGGTGGTGCATGG-CCGTTCTTAGTTGGTG-GAGTGATTTGTCTGGTTAATTCCGTTAACGAACGAGACCTCCGCCTACTAAATAGTTG-----TATGCAAGTTTTTGCTTGTGTA--TATACTTCTTAGAGGGACTTTTGGTGATT--AACTAAAGGAAGTTGGAGGCAATAACAGGTCTGTGATGCCCTTAGATGTTCTGGGCCGCACGCGCGCTACACTGATGCATTCAACAAGTCTATAACCTTGATCGATAGATCTGGGTAATCTTTTGAACGTGCATCGTGCTAGGGATAGATTATTGCAATTATTAATCTTGAACGAGGAATTCCTAGTAAACGCAAGTCATCAGCTTGCATTGATTACGTCCCTGCCCTTTGTACACACCGCCCGTCGCACCTACTGATTGAGTGACTCGATGAAATATTGGGACC-------GTGA------AGGTATCTTTC-TTTATTGAAAGTACTTTCGTG-GGAACTTTTTTAAATCTCGCCAC--------------------------------------------------------------
>FM202391.1
---------------------------------TCACATACGCTTGTCTCAAGGATTAAGCCATGCATGTCTAAGTATAAACAATTTTGTACTGTGAAACTGCGAATAGCTCATTATATCAGTTATAGTTTATTTGATAGTACCTTACTACTTGGATAACCGTAGTAATTCTAGAGCTAATACATGCAT-AAATACCCGACTT---TT---TGGAAGGGTAGCATTTATTAGAAAGAAACCAATGCGG---CTTT------GCCGGTATTGAGTTGAATCATAATAACTGTGCGGATCGCA-----CT--CTGT-----GCGATAAATCATATAAGTTTCTGCCCTATCAGGTTTGGATGGTAGGGTATTGGCCTACCATGCCAGTAACGGGTAACGGAGTATTAGGGTACGATTCCGGAGAGGGAGCCTTAAAGACAGCTACCACTTCTAAGGAAGGCAGCAGGCGCGTAAATTACCCAATCCTGACAC-AGGGAGGTAGCGACAATAAATAACAATGCCGGGCTTTTTAAAGTCTGGCAATTGGAATGAGAACAATTTAAATCCCTTATCGAGGATCAATTGGAGGGCAAGTCTGGTGCCAGCAGCCGCGGTAATTCCAGCTCCNATAGCGTATATTAAAGTTGTTGCAGTTAAAAAGCTCGTAGTTGGAWTTCGATKAGT-GGATGT---TTCGGTCCATTTGCTTTTTGCATTTGC--GTAC--TATG-AAACATCTG-T-TCAT--TTTTGTGAGAGAGATTTA---CTGCCATTAATTTGG-TGGTTTATCAATCTTGCA--TCGTTTACTGTGAAAAAATTAGAGTGTTTAAAGCAGGCT-TT--GGCCAAATCTTGAATACATTAGCATGGAATAATAAGATATGACTTTGGTGGTCTATTTTGTTGGTTTGCACA-CCAGAGTAATGATTAATAGGGACAGTT-GGGGGTATTTATATTCCAT-CGTCAGAGGTGAAATTCTTGGATCGATGGAAGATAAACTAATGCGAAAGCATTTATCAAGGATGTTTTCATTAATCAAGAACGAAAGTTAGGGGATCGAAGATGATTAGATACCATCGTAGTCTTAACCATAAACTATGCCGACTCAGGATTGGTAGTTGTT-TA---ATTTTAATGACACTATCAGCACTGTATGAGAAATCAAAGTTTTTGGGTTCC-GGGGGGAGTATGGTCGCAAGGCTGAAACTTAAAGGAA--TTGACGGAAGGGCACCACCAGGAGTGGAGCCTGCGGCTTAATTTGACTCAACACGGGGAAACTTACCAGGTCCAGACATAGTAA-GGATTGACAGATTGAGAGCTCTTTCTTGA-TTCTATGGGTGGTGGTGCATGG-CCGTTCTTAGTTGGTG-GAGTGATTTGTCTGGTTAATTCCGTTAACGAACGAGACCTCCGCCTACTAAATAGTT---GTATGC-AA-GTTTTTGCTTGTGTA--TATACTTCTTAGAGGGACTTTTGGTGATT--AACTAAAGGAAGTTGGAGGCAATAACAGGTCTGTGATGCCCTTAGATGTTCTGGGCCGCACGCGCGCTACACTGATGCATTCAACAAGTCTATAACCTTGATCGATAGATCTGGGTAATCTTTTGAACGTGCATCGTGCTAGGGATAGATTATTGCAATTATTAATCTTGAACGAGGAATTCCTAGTAAACGCAAGTCATCAGCTTGCATTGATTACGTCCCTGCCCTTTGTACACACCGCCCGTCGCACCTACTGATTGAGTGACTCGRTGAAATATTGGGACC-------GTGA------AGGTATCTTTC-TTTATTGAAAGTACTTTCGTG-GGAACTTTTTTAAATCTCGCCACTTAGAAGAAGGTGAAGTCGTAACAAGGTTTCCGTAGGTGAACCTGCGGAAGGATCATTA---
>AY032607.2
---------------------------------TCACATACGCTTGTCTCAAGGATTAAGCCATGCATGTCTAAGTATAAACAATTTTGTACTGTGAAACTGCGAATAGCTCATTATATCAGTTATAGTTTATTTGATAGTACCTTACTACTTGGATAACCGTAGTAATTCTAGAGCTAATACATGCAT-AAATACCCGACTT---TT---TGGAAGGGTAGCATTTATTAGAAAGAAACCAATGCGG---CTTT------GCCGGTATTGAGTTGAATCATAATAACTGTGCGGATCGCA-----CT--CTGT-----GCGATAAATCATATAAGTTTCTGCCCTATCAGGTTTGGATGGTAGGGTATTGGCCTACCATGCCAGTAACGGGTAACGGAGTATTAGGGTACGATTCCGGAGAGGGAGCCTTAAAGACAGCTACCACTTCTAAGGAAGGCAGCAGGCGCGTAAATTACCCAATCCTGACAC-AGGGAGGTAGCGACAATAAATAACAATGCCGGGCTTTTTAAAGTCTGGCAATTGGAATGAGAACAATTTAAATCCCTTATCGAGGATCAATTGGAGGGCAAGTCTGGTGCCAGCAGCCGCGGTAATTCCAGCTCCAATAGCGTATATTAAAGTTGTTGCAGTTAAAAAGCTCGTAGTTGGATTTC--TGAGT-GGATGT---TTCGGTCCATTTGCTTTTTGCATTTGC--GTAC--TATG-AAACATCTG-T-TCAT--TTTTGTGAGAGAGATTTA---CTGCCATTAATTTGG-TGGTTTATCAATCTTGCA--TCGTTTACTGTGAAAAAATTAGAGTGTTTAAAGCAGGCT-TT--GGCCAAATCTTGAATACATTAGCATGGAATAATAAGATATGACTTTGGTGGTCTATTTTGTTGGTTTGCACA-CCAGAGTAATGATTAATAGGGACAGTT-GGGGGTATTTATATTCCAT-CGTCAGAGGTGAAATTCTTGGATCGATGGAAGATAAACTAATGCGAAAGCATTTATCAAGGATGTTTTCATTAATCAAGAACGAAAGTTAGGGGATCGAAGATGATTAGATACCATCGTAGTCTTAACCATAAACTATGCCGACTCAGGATTGGTAGTTGTT-TA---ATTTTAATGACACTATCAGCACTGTATGAGAAATCAAAGTTTTTGGGTTCC-GGGGGGAGTATGGTCGCAAGGCTGAAACTTAAAGGAA--TTGACGGAAGGGCACCACCAGGAGTGGAGCCTGCGGCTTAATTTGACTCAACACGGGGAAACTTACCAGGTCCAGACATAGTAA-GGATTGACAGATTGAGAGCTCTTTCTTGA-TTCTATGGGTGGTGGTGCATGG-CCGTTCTTAGTTGGTG-GAGTGATTTGTCTGGTTAATTCCGTTAACGAACGAGACCTCCGCCTACTAAATAGTT---GTATGC-AA-GTTTTTGCTTGTGTA--TATACTTCTTAGAGGGACTTTTGGTGATT--AACTAAAGGAAGTTGGAGGCAATAACAGGTCTGTGATGCCCTTAGATGTTCTGGGCCGCACGCGCGCTACACTGATGCATTCAACAAGTCTATAACCTTGATCGATAGATCTGGGTAATCTTTTGAACGTGCATCGTGCTAGGGATAGATTATTGCAATTATTAATCTTGAACGAGGAATTCCTAGTAAACGCAAGTCATCAGCTTGCATTGATTACGTCCCTGCCCTTTGTACACACCGCCCGTCGCACCTACTGATTGAGTGACTCGATGAAATATTGGGACC-------GTGA------AGGTATCTTTC-TTTATTGAAAGTACTTTCGTG-GGAACTTTTTTAAATCTCGCCACTTAGAAGAAGGTGAAGTCGTAACAAGGTTTCCGTAGGTGAACCTGCGGAAGG----------
>AB368176.1
---------------------------------TCACATACGCTTGTCTCAAGGATTAAGCCATGCATGTCTAAGTATAAACAATTTTGTACTGTGAAACTGCGAATAGCTCATTATATCAGTTATAGTTTATTTGATAGTACCTTACTACTTGGATAACCGTAGTAATTCTAGAGCTAATACATGCAT-AAATACCCGACTT---TT---TGGAAGGGTAGCATTTATTAGAAAGAAACCAATGCGG---CTTT------GCCGGTATTGAGTTGAATCATAATAACTGTGCGGATCGCA-----CT--CTGT-----GCGATAAATCATATAAGTTTCTGCCCTATCAGGTTTGGATGGTAGGGTATTGGCCTACCATGCCAGTAACGGGTAACGGAGTATTAGGGTACGATTCCGGAGAGGGAGCCTTAAAGACAGCTACCACTTCTAAGGAAGGCAGCAGGCGCGTAAATTACCCAATCCTGACAC-AGGGAGGTAGCGACAATAAATAACAATGCCGGGCTTTTTAAAGTCTGGCAATTGGAATGAGAACAATTTAAATCCCTTATCGAGGATCAATTGGAGGGCAAGTCTGGTGCCAGCAGCCGCGGTAATTCCAGCTCCAATAGCGTATATTAAAGTTGTTGCAGTTAAAAAGCTCGTAGTTGGATTTC--TGAGT-GGATGT---TTCGGTCCATTTGCTTTTTGCATTTGC--GTAC--TATG-AAACATCTG-T-TCAT--TTTTGTGAGAGAGATTTA---CTGCCATTAATTTGG-TGGTTTATCAATCTTGCA--TCGTTTACTGTGAAAAAATTAGAGTGTTTAAAGCAGGCT-TT--GGCCAAATCTTGAATACATTAGCATGGAATAATAAGATATGACTTTGGTGGTCTATTTTGTTGGTTTGCACA-CCAGAGTAATGATTAATAGGGACAGTT-GGGGGTATTTATATTCCAT-CGTCAGAGGTGAAATTCTTGGATCGATGGAAGATAAACTAATGCGAAAGCATTTATCAAGGATGTTTTCATTAATCAAGAACGAAAGTTAGGGGATCGAAGATGATTAGATACCATCGTAGTCTTAACCATAAACTATGCCGACTCAGGATTGGTAGTTGTT-TA---ATTTTAATGACACTATCAGCACTGTATGAGAAATCAAAGTTTTTGGGTTCC-GGGGGGAGTATGGTCGCAAGGCTGAAACTTAAAGGAA--TTGACGGAAGGGCACCACCAGGAGTGGAGCCTGCGGCTTAATTTGACTCAACACGGGGAAACTTACCAGGTCCAGACATAGTAA-GGATTGACAGATTGAGAGCTCTTTCTTGA-TTCTATGGGTGGTGGTGCATGG-CCGTTCTTAGTTGGTG-GAGTGATTTGTCTGGTTAATTCCGTTAACGAACGAGACCTCCGCCTACTAAATAGTT---GTATGC-AA-GTGTTTGCTTGTGTA--TATACTTCTTAGAGGGACTTTTGGTGATT--AACTAAAGGAAGTTGGAGGCAATAACAGGTCTGTGATGCCCTTAGATGTTCTGGGCCGCACGCGCGCTACACTGATGCATTCAACAAGTCTATAACCTTGATCGATAGATCTGGGTAATCTTTTGAACGTGCATCGTGCTAGGGATAGATTATTGCAATTATTAATCTTGAACGAGGAATTCCTAGTAAACGCAAGTCATCAGCTTGCATTGATTACGTCCCTGCCCTTTGTACACACCGCCCGTCGCACCTACTGATTGAGTGACTCGATGAAATATTGGGACC-------GTGA------AGGTATCTTTC-TTTATTGAAAGTACTTTCGTG-GGAACTTTTTTAAATCTCGCCACTTAGAAGAAGGTGAAGTCGTAACAAGGTTTCCGTAGGTGAACCTGCGGAAGG----------
>AB425200.1
----------------------------------------------------------------------------------AAGTCTGAACTTCAAAACTGCGAATGGCTCATTATATCAGTTATAGTTTATTTGATAGTACCTTACTACTTGGATAACCGTAGTAATTCTAGAGCTAATACATGCAT-AAATACCCAACTATC-TTTGGTGGACGGGTAGCATTTATTAGATTGAAACCAATGCAT--AGTTTCGG--CTATGGTATTGAGTTGAATCATAATAACTGTGCGGATCGTG----CTT--CGGC-----GCGATAGATCATTTAAGTTTCTGCCCTATCAGCTTTGGATGGTAGGGTATTGGCCTACCATGGCGGTAACGGGTAACGGGGAATTAGGGTTCGATTCCGGAGAGGGAGCCTGAGAAACGGCTACCACATCCAAGGAAGGCAGCAGGCGCGTAAATTACCCAATCCTAATTC-AGGGAGGTAGTGACAATAAATAACAATGC-CGGGCTTTTTAAGTCTGGCAATTGGAATGAGAACAATTTAAATCCCTTATCGAGGATCAATTGGAGGGCAAGTCTGGTGCCAGCAGCCGCGGTAATTCCAGCTCCAATAGCGTATATTAAAGTTGTTGCAGTTAAAAAGCTCGTAGTTGGATTTC--TGGAT-TGAACG---TCCGGTCCGCGTACCTTTGGTGCGTGC--GTAC--TATG-GATGTTTGT-T-CCA---TTTTACTAGAAATGTCTT---CTGCCATTAGGTTGG-TGGG-GGGCAATTTTCTAGTTCTTTTACTGTGAATAACTCAGCTTGCTCCAGAAAGGCG-TT--TGCCAAATTTTGAATGCATTAGCATGGAATAATAAGATAAGACTTTGGTGGTCTGTTTTGTTGGTTTACACA-CCAGAGTAATGATTAATAGGGACAGTT-GGGGGTATCTATATTTCAT-TGTCAGAGGTGAAATTCTTGGATCAATGAAAGATAAACTAATGCGAAAGCATTTACCAAGGATGTTTTCTTTAATCAAGAACGAAAGTTAGGGGATCGAAGATGATTAGATACCATCGTAGTCTTAACCATAAACTATGCCGACTCGGGATTGGTAGTTGTTCTA---ATTAGAATGACATTATCAGCACCGTAAGAGAAATCAAAGTCTTTGGGTTCC-GGGGGGAGTATGGTCGCAAGGCTGAAACTTAAAGGAA--TTGACGGAAGGGCACCACCAGGAGTGGAGCCTGCGGCTTAATTTGACTCAACACGGGGAAACTTACCAGGTCCAGACATAGTAA-GGATTGACAGATTGAGAGCTCTTTCTTGA-TTCTATGGGTGGTGGTGCATGG-CCGTTCTTAGTTGGTG-GAGTGATTTGTCTGGTTAATTCCGTTAACGAACGAGACCTCCGCGTGCTAAATAGTTT-CGATTGC----TTTTTGAGCAGTTCA--GAAACTTCTTAGAGGGACTTTTGGCGATT--AGCCAAAGGAAGTTGGAGGCAATAACAGGTCTGTGATGCCCTTAGATGTTCTGGGCCGCACGCGCGCTACACTGATGCGTTCAACGAGTTTATAACCTTGATCGATAGTTCTGGGTAATCTTTTGAACTCGCATCGTGCTAGGGATAGATTATTGCAATTATTAATCTTGAACGAGGAATTCCTAGTAAACGCAAGTCATCAGCTTGCATTGATTACGTCCCTGCCCTTTGTACACACCGCCCGTCGCACCTACCGATTGAATGACTCGGTGAGAAATTGGGATC-------GTGA-------GATTGTCCTCCTTCATTGGGGGCGTTTTCGTG-AGAACTTTTTCAAACCTCGTCATT-------------------------------------------------------------
>AB425201.1
--------------------------------------------------------GGAAGCGGGTAGTACAGAATATGAAC-----------TTCAAACTGCGAATGGCTCATTATATCAGTTATAGTTTATTTGATAGTACCTTACTACTTGGATAACCGTAGTAATTCTAGAGCTAATACATGCAT-AAATACCCAACTATC-TTTGGTGGACGGGTAGCATTTATTAGATTGAAACCAATGCAT--AGTTTCGG--CTATGGTATTGAGTTGAATCATAATAACTGTGCGGATCGTG----CTT--CGGC-----GCGATAGATCATTTAAGTTTCTGCCCTATCAGCTTTGGATGGTAGGGTATTGGCCTACCATGGCGGTAACGGGTAACGGGGAATTAGGGTTCGATTCCGGAGAGGGAGCCTGAGAAACGGCTACCACATCCAAGGAAGGCAGCAGGCGCGTAAATTACCCAATCCTAATTC-AGGGAGGTAGTGACAATAAATAACAATGC-CGGGCTTTTTAAGTCTGGCAATTGGAATGAGAACAATTTAAATCCCTTATCGAGGATCAATTGGAGGGCAAGTCTGGTGCCAGCAGCCGCGGTAATTCCAGCTCCAATAGCGTATATTAAAGTTGTTGCAGTTAAAAAGCTCGTAGTTGGATTTC--TGGAT-TGAACG---TCCGGTCCGCGTACCTTTGGTGCGTGC--GTAC--TATG-GATGTTTGT-T-CCA---TTTTACTAGAAATGTCTT---CTGCCATTAGGTTGG-TGGG-GGGCAATTTTCTAGTTCTTTTACTGTGAATAACTCAGCTTGCTCCAGAAAGGCG-TT--TGCCAAATTTTGAATGCATTAGCATGGAATAATAAGATAAGACTTTGGTGGTCTGTTTTGTTGGTTTACACA-CCAGAGTAATGATTAATAGGGACAGTT-GGGGGTATCTATATTTCAT-TGTCAGAGGTGAAATTCTTGGATCAATGAAAGATAAACTAATGCGAAAGCATTTACCAAGGATGTTTTCTTTAATCAAGAACGAAAGTTAGGGGATCGAAGATGATTAGATACCATCGTAGTCTTAACCATAAACTATGCCGACTCGGGATTGGTAGTTGTTCTA---ATTAGAATGACATTATCAGCACCGTAAGAGAAATCAAAGTCTTTGGGTTCC-GGGGGGAGTATGGTCGCAAGGCTGAAACTTAAAGGAA--TTGACGGAAGGGCACCACCAGGAGTGGAGCCTGCGGCTTAATTTGACTCAACACGGGGAAACTTACCAGGTCCAGACATAGTAA-GGATTGACAGATTGAGAGCTCTTTCTTGA-TTCTATGGGTGGTGGTGCATGG-CCGTTCTTAGTTGGTG-GAGTGATTTGTCTGGTTAATTCCGTTAACGAACGAGACCTCCGCGTGCTAAATAGTTT-CGATTGC----TTTTTGAGCAGTTCA--GAAACTTCTTAGAGGGACTTTTGGCGATT--AGCCAAAGGAAGTTGGAGGCAATAACAGGTCTGTGATGCCCTTAGATGTTCTGGGCCGCACGCGCGCTACACTGATGCGTTCAACGAGTTTATAACCTTGATCGATAGTTCTGGGTAATCTTTTGAACTCGCATCGTGCTAGGGATAGATTATTGCAATTATTAATCTTGAACGAGGAATTCCTAGTAAACGCAAGTCATCAGCTTGCATTGATTACGTCCCTGCCCTTTGTACACACCGCCCGTCGCACCTACCGATTGAATGACTCGGTGAGAAATTGGGATC-------GTGA-------GATTGTCCTCGTTCATTGGGGGCGTTTTCGTG-AGAACTTTTTCAAACCTCGTCATTAGAGAAGGGAATCAGATGCGG----------------------------------------
>AB425205.1
---------------------------------------------------------------------------TATCAG-AAGTCTGAACTTCAAAACTGCGAATGGCTCATTATATCAGTTATAGTTTATTTGATAGTACCTTACTACTTGGATAACCGTAGTAATTCTAGAGCTAATACATGCAT-AAATACCCAACTATC-TTTGGTGGACGGGTAGCATTTATTAGATTGAAACCAATGCAT--AGTTTCGG--CTATGGTATTGAGTTGAATCATAATAACTGTGCGGATCGTG----CTT--CGGC-----GCGATAGATCATTTAAGTTTCTGCCCTATCAGCTTTGGATGGTAGGGTATTGGCCTACCATGGCGGTAACGGGTAACGGGGAATTAGGGTTCGATTCCGGAGAGGGAGCCTGAGAAACGGCTACCACATCCAAGGAAGGCAGCAGGCGCGTAAATTACCCAATCCTAATTC-AGGGAGGTAGTGACAATAAATAACAATGC-CGGGCTTTTAAAGTCTGGCAATTGGAATGAGAACAATTTAAATCCCTTATCGAGGATCAATTGGAGGGCAAGTCTGGTGCCAGCAGCCGCGGTAATTCCAGCTCCAATAGCGTATATTAAAGTTGTTGCAGTTAAAAAGCTCGTAGTTGGATTTC--TGGAT-TGAATA---TCCGGTCCGCGTGCCTTTGGTGCGTGA--GTAC--TATG-GATGTTTGT-T-CCA---TTTTACTAGAAATGTTTT---CTGCCATTCGGTTGG-TGGG-AGGCAATTTTCTAGTTCTTTTACTGTGAATAACTCAGCTTGCTCCAGAAAGGCG-TT--TGCCAAATTTTGAATGCATTAGCATGGAATAATAAGATAAGACTTTGGTGGTCTGTTTTGTTGGTTTACACA-CCAGAGTAATGATTAATAGGGACAGTT-GGGGGTATCTATATTTCAT-TGTCAGAGGTGAAATTCTTGGATCAATGAAAGATAAACTAATGCGAAAGCATTTACCAAGGATGTTTTCTTTAATCAAGAACGAAAGTTAGGGGATCGAAGATGATTAGATACCATCGTAGTCTTAACCATAAACTATGCCGACTCGGGATTGGTAGTTGTTCTA---ATTAGAATGACATTATCAGCACCGTAAGAGAAATCAAAGTCTTTGGGTTCC-GGGGGGAGTATGGTCGCAAGGCTGAAACTTAAAGGAA--TTGACGGAAGGGCACCACCAGGAGTGGAGCCTGCGGCTTAATTTGACTCAACACGGGGAAACTTACCAGGTCCAGACATAGTAA-GGATTGACAGATTGAGAGCTCTTTCTTGA-TTCTATGGGTGGTGGTGCATGG-CCGTTCTTAGTTGGTG-GAGTGATTTGTCTGGTTAATTCCGTTAACGAACGAGACCTCCGCGTGCTAAATAGTTT-CGATTGC----TTTTTGAGCAGTTTA--GAAACTTCTTAGAGGGACTTTTGGCGATT--AGCCAAAGGAAGTTGGAGGCAATAACAGGTCTGTGATGCCCTTAGATGTTCTGGGCCGCACGCGCGCTACACTGATGCGTTCAACGAGTTTATAACCTTGATCGATAGTTCTGGGTAATCTTTTGAACTCGCATCGTGCTAGGGATAGATTATTGCAATTATTAATCTTGAACGAGGAATTCCTAGTAAACGCAAGTCATCAGCTTGCATTGATTACGTCCCTGCCCTTTGTACACACCGCCCGTCGCACCTACCGATTGAATGACTCGGTGAGAAATTGGGATC-------GTGA-------GATTGTTCTCCTTTATTGGGGGCGCTTTCGTG-AGAACTTTTTCAAACCTCGTCATT-------------------------------------------------------------
>AB425204.1
---------------------------------------------------------------------------TATCAG-AAGTCTGAACTTCAAAACTGCGAATGGCTCATTATATCAGTTATAGTTTATTTGATAGTACCTTACTACTTGGATAACCGTAGTAATTCTAGAGCTAATACATGCAT-AAATACCCAACTATC-TTTGGTGGACGGGTAGCATTTATTAGATTGAAACCAATGCAT--AGTTTCGG--CTATGGTATTGAGTTGAATCATAATAACTGTGCGGATCGTG----CTT--CGGC-----GCGATAGATCATTTAAGTTTCTGCCCTATCAGCTTTGGATGGTAGGGTATTGGCCTACCATGGCGGTAACGGGTAACGGGGAATTAGGGTTCGATTCCGGAGAGGGAGCCTGAGAAACGGCTACCACATCCAAGGAAGGCAGCAGGCGCGTAAATTACCCAATCCTAATTC-AGGGAGGTAGTGACAATAAATAACAATGC-CGGGCTTTTAAAGTCTGGCAATTGGAATGAGAACAATTTAAATCCCTTATCGAGGATCAATTGGAGGGCAAGTCTGGTGCCAGCAGCCGCGGTAATTCCAGCTCCAATAGCGTATATTAAAGTTGTTGCAGTTAAAAAGCTCGTAGTTGGATTTC--TGGAT-TGAATA---TCCGGTCCGCGTGCCTTTGGTGCGTGA--GTAC--TATG-GATGTTTGT-T-CCA---TTTTACTAGAAATGTTTT---CTGCCATTCGGTTGG-TGGG-AGGCAATTTTCTAGTTCTTTTACTGTGAATAACTCAGCTTGCTCCAGAAAGGCG-TT--TGCCAAATTTTGAATGCATTAGCATGGAATAATAAGATAAGACTTTGGTGGTCTGTTTTGTTGGTTTACACA-CCAGAGTAATGATTAATAGGGACAGTT-GGGGGTATCTATATTTCAT-TGTCAGAGGTGAAATTCTTGGATCAATGAAAGATAAACTAATGCGAAAGCATTTACCAAGGATGTTTTCTTTAATCAAGAACGAAAGTTAGGGGATCGAAGATGATTAGATACCATCGTAGTCTTAACCATAAACTATGCCGACTCGGGATTGGTAGTTGTTCTA---ATTAGAATGACATTATCAGCACCGTAAGAGAAATCAAAGTCTTTGGGTTCC-GGGGGGAGTATGGTCGCAAGGCTGAAACTTAAAGGAA--TTGACGGAAGGGCACCACCAGGAGTGGAGCCTGCGGCTTAATTTGACTCAACACGGGGAAACTTACCAGGTCCAGACATAGTAA-GGATTGACAGATTGAGAGCTCTTTCTTGA-TTCTATGGGTGGTGGTGCATGG-CCGTTCTTAGTTGGTG-GAGTGATTTGTCTGGTTAATTCCGTTAACGAACGAGACCTCCGCGTGCTAAATAGTTT-CGATTGC----TTTTTGAGCAGTTTA--GAAACTTCTTAGAGGGACTTTTGGCGATT--AGCCAAAGGAAGTTGGAGGCAATAACAGGTCTGTGATGCCCTTAGATGTTCTGGGCCGCACGCGCGCTACACTGATGCGTTCAACGAGTTTATAACCTTGATCGATAGTTCTGGGTAATCTTTTGAACTCGCATCGTGCTAGGGATAGATTATTGCAATTATTAATCTTGAACGAGGAATTCCTAGTAAACGCAAGTCATCAGCTTGCATTGATTACGTCCCTGCCCTTTGTACACACCGCCCGTCGCACCTACCGATTGAATGACTCGGTGAGAAATTGGGATC-------GTGA-------GATTGTTCTCCTTTATTGGGGGCGCTTTCGTG-AGAACTTTTTCAAACCTCGTCATT-------------------------------------------------------------
>KT257317.1
------------------------------------------------TCAAAGATTAAGCCATGCATGTGTAAGTATCAG-AAGTCTGAACTTCAAAACTGCGAATGGCTCATTATATCAGTTATAGTTTATTTGATAGTACCTTACTACTTGGATAACCGTAGTAATTCTAGAGCTAATACATGCAT-AAATACCCAACTATC-TTTGGTGGACGGGTAGCATTTATTAGATTGAAACCAATGCAT--AGTTTCGG--CTATGGTATTGAGTTGAATCATAATAACTGTGCGGATCGTG----CTT--CGGC-----GCGATAGATCATTTAAGTTTCTGCCCTATCAGCTTTGGATGGTAGGGTATTGGCCTACCATGGCGGTAACGGGTAACGGGGAATTAGGGTTCGATTCCGGAGAGGGAGCCTGAGAAACGGCTACCACATCCAAGGAAGGCAGCAGGCGCGTAAATTACCCAATCCTAATTC-AGGGAGGTAGTGACAATAAATAACAATGC-CGGGCTTTTTAAGTCTGGCAATTGGAATGAGAACAATTTAAATCCCTTATCGAGGATCAATTGGAGGGCAAGTCTGGTGCCAGCAGCCGCGGTAATTCCAGCTCCAATAGCGTATATTAAAGTTGTTGCAGTTAAAAAGCTCGTAGTTGGATTTC--TGGAT-TGAACG---TCCGGTCCGCGTACCTTTGGTGCGTGC--GTAC--TATG-GATGTTTGT-T-CCA---TTTTACTAGAAATGTYTT---CTGCCATTAGGTTGG-TGGG-GGGCAATTTTCTAGTTCTTTTACTGTGAATAACTCAGCTTGCTCCAGAAAGGCG-TT--TGCCAAATTTTGAATGCATTAGCATGGAATAATAAGATAAGACTTTGGTGGTCTGTTTTGTTGGTTTACACA-CCAGAGTAATGATTAATAGGGACAGTT-GGGGGTATCTATATTTCAT-TGTCAGAGGTGAAATTCTTGGATCAATGAAAGATAAACTAATGCGAAAGCATTTACCAAGGATGTTTTCTTTAATCAAGAACGAAAGTTAGGGGATCGAAGATGATTAGATACCATCGTAGTCTTAACCATAAACTATGCCGACTCGGGATTGGTAGTTGTTCTA---ATTAGAATGACATTATCAGCACCGTAAGAGAAATCAAAGTCTTTGGGTTCC-GGGGGGAGTATGGTCGCAAGGCTGAAACTTAAAGGAA--TTGACGGAAGGGCACCACCAGGAGTGGAGCCTGCGGCTTAATTTGACTCAACACGGGGAAACTTACCAGGTCCAGACATAGTAA-GGATTGACAGATTGAGAGCTCTTTCTTGA-TTCTATGGGTGGTGGTGCATGG-CCGTTCTTAGTTGGTG-GAGTGATTTGTCTGGTTAATTCCGTTAACGAACGAGACCTCCGCGTGCTAAATAGTTT-CGATTGC----TTTTTGAGCAGTTCA--GAAACTTCTTAGAGGGACTTTTGGCGATT--AGCCAAAGGAAGTTGGAGGCAATAACAGGTCTGTGATGCCCTTAGATGTTCTGGGCCGCACGCGCGCTACACTGATGCGTTCAACGAGTTTATAACCTTGATCGATAGTTCTGGGTAATCTTTTGAACTCGCATCGTGCTAGGGATAGATTATTGCAATTATTAATCTTGAACGAGGAATTCCTAGTAAACGCAAGTCATCAGCTTGCATTGATTACGTCCCTGCCCTTTGTACACACCGCCCGTCGCACCTACCGATTGAATGACTCGGTGAGAAATTGGGATC-------GTGA-------GATTGTCCTCCTTCATTGGGGGCGTTTTCGTG-AGAACTTTTTCAAACCTCGTCATTTAGAGGAAGGTGAAGTCGTAACAAGGTTTCCGTAGGTGAACCTGCGGAAGGATCATTA---
>AB425203.1
---------------------------------------------------------------------------------------------------CTGCGAATGGCTCATTATATCAGTTATAGTTTATTTGATAGTACCTTACTACTTGGATAACCGTAGTAATTCTAGAGCTAATACATGCAT-AAATACCCAACTATC-TTTGGTGGACGGGTAGCATTTATTAGATTGAAACCAATGCATAGCTTTTAGT---TATGGTATTGAGTTGAATCATAATAACTGTGCGGATCGTG----CTT--CGGC-----GCGATAGATCATTTAAGTTTCTGCCCTATCAGCTTTGGATGGTAGGGTATTGGCCTACCATGGCGGTAACGGGTAACGGGGAATTAGGGTTCGATTCCGGAGAGGGAGCCTGAGAAACGGCTACCACATCCAAGGAAGGCAGCAGGCGCGTAAATTACCCAATCCTAATTC-AGGGAGGTAGTGACAATAAATAACAATGC-CGGGCTTTTAAAGTCTGGCAATTGGAATGAGAACAATTTAAATCCCTTATCGAGGATCAATTGGAGGGCAAGTCTGGTGCCAGCAGCCGCGGTAATTCCAGCTCCAATAGCGTATATTAAAGTTGTTGCAGTTAAAAAGCTCGTAGTTGGATTTC--TGGAT-TGAATA---TCCGGTCCGCGTACCTTTGGTGCGTGC--GTAC--TATG-GATGTTTGT-T-CCA---TTTTACTAGAAATGTTTT---CTGCCATTAGGTTGG-TGGG-AGGCAATTTTCTAGTTCTTTTACTGTGAATAACTCAGCTTGCTCCAGAAAGGCG-TT--TGCCAAATTTTGAATGCATTAGCATGGAATAATAAGATAAGACTTTGGTGGTCTGTTTTGTTGGTTTACACA-CCAGAGTAATGATTAATAGGGACAGTT-GGGGGTATCTATATTTCAT-TGTCAGAGGTGAAATTCTTGGATCAATGAAAGATAAACTAATGCGAAAGCATTTACCAAGGATGTTTTCTTTAATCAAGAACGAAAGTTAGGGGATCGAAGATGATTAGATACCATCGTAGTCTTAACCATAAACTATGCCGACTCGGGATTGGTAGTTGTTCTA---ATTAGAATGACATTATCAGCACCGTAAGAGAAATCAAAGTCTTTGGGTTCC-GGGGGGAGTATGGTCGCAAGGCTGAAACTTAAAGGAA--TTGACGGAAGGGCACCACCAGGAGTGGAGCCTGCGGCTTAATTTGACTCAACACGGGGAAACTTACCAGGTCCAGACATAGTAA-GGATTGACAGATTGAGAGCTCTTTCTTGA-TTCTATGGGTGGTGGTGCATGG-CCGTTCTTAGTTGGTG-GAGTGATTTGTCTGGTTAATTCCGTTAACGAACGAGACCTCCGCGTGCTAAATAGTTT-CGATTGC----TTTTTGAGCAGTCTA--GAAACTTCTTAGAGGGACTTTTGGCGATT--AGCCAAAGGAAGTTGGAGGCAATAACAGGTCTGTGATGCCCTTAGATGTTCTGGGCCGCACGCGCGCTACACTGATGCGTTCAACGAGTTTATAACCTTGATCGATAGTTCTGGGTAATCTTTTGAACTCGCATCGTGCTAGGGATAGATTATTGCAATTATTAATCTTGAACGAGGAATTCCTAGTAAACGCAAGTCATCAGCTTGCATTGATTACGTCCCTGCCCTTTGTACACACCGCCCGTCGCACCTACCGATTGAATGACTCGGTGAGAAATTGGGATC-------GTGA-------GATTGTTCTCCTTCATTGGGGGCGTTTTCGTG-AGAACTTTTTCAAACC---------------------------------------------------------------------
>AB425199.1
--------------------------------------------------------------------------GTATCAGAAGTC-TGAACTTCAAAACTGCGAATGGCTCATTATATCAGTTATAGTTTATTTGATAGTACCTTACTACTTGGATAACCGTAGTAATTCTAGAGCTAATACATGCAT-AAATACCCAACTATCGTTAGGTGGACGGGTAGCATTTATTAGATTGAAACCAATGCAT--GGCTTCGG--CTGTGGTATTGAGTTGAATCATAATAACTGTGCGGATCGTG----CTT--CGGC-----GCGATAGATCATATAAGTTTCTGCCCTATCAGCTTTGGATGGTAGGGTATTGGCCTACCATGGCGGTAACGGGTAACGGGGAATTAGGGTTCGATTCCGGAGAGGGAGCCTGAGAAACGGCTACCACATCCAAGGAAGGCAGCAGGCGCGTAAATTACCCAATCCTAATTC-AGGGAGGTAGTGACAATAAATAACAATGC-CGGGCTTTTCAAGTCTGGCAATTGGAATGAGAACAATTTAAATCCCTTAACGAGGATCAATTGGAGGGCAAGTCTGGTGCCAGCAGCCGCGGTAATTCCAGCTCCAATAGCGTATATTAAAGTTGTTGCAGTTAAAAAGCTCGTAGTTGGATTTC--TGGAT-TGAACG---TCCGGTCCGCGTACTTTTGGTGCGTGT--GTAC--TATG-GATGTTTGT-T-CCA---TTTTACTAGAAATGTTTT---CTGCCATTAGGTTGG-TGGA-AGGCAATTTTCTAGTTCTTTTACTGTGAATAACTCAGCTTGCTCCAGAAAGGCG-TT--TGCCAAATTTTGAATGCATTAGCATGGAATAATAAGATAAGACTTTGGTGGTCTGTTTTGTTGGTTTACACA-CCAGAGTAATGATTAATAGGGACAGTT-GGGGGTATCTATATTTCAT-TGTCAGAGGTGAAATTCTTGGATCAATGAAAGATAAACTAATGCGAAAGCATTTACCAAGGATGTTTTCTTTAATCAAGAACGAAAGTTAGGGGATCGAAGATGATTAGATACCATCGTAGTCTTAACCATAAACTATGCCGACTCGGGATTGGTAGTTGTTCTA---ATTAGAATGACATTATCAGCACCGTAAGAGAAATCAAAGTCTTTGGGTTCC-GGGGGGAGTATGGTCGCAAGGCTGAAACTTAAAGGAA--TTGACGGAAGGGCACCACCAGGAGTGGAGCCTGCGGCTTAATTTGACTCAACACGGGGAAACTTACCAGGTCCAGACATAGTAA-GGATTGACAGATTGAGAGCTCTTTCTTGA-TTCTATGGGTGGTGGTGCATGG-CCGTTCTTAGTTGGTG-GAGTGATTTGTCTGGTTAATTCCGTTAACGAACGAGACCTCCGCGTGCTAAATAGTTT-CGATTGC----TTTATAGCAGTTGAG---AAACTTCTTAGAGGGACTTTTGGCGATT--AGCCAAAGGAAGTTGGAGGCAATAACAGGTCTGTGATGCCCTTAGATGTTCTGGGCCGCACGCGCGCTACACTGATGCGTTCAACGAGTTTATAACCTTGATCGATAGTTCTGGGTAATCTTTTGAACTCGCATCGTGCTAGGGATAGATTATTGCAATTATTAATCTTGAACGAGGAATTCCTAGTAAACGCAAGTCATCAGCTTGCATTGATTACGTCCCTGCCCTTTGTACACACCGCCCGTCGCACCTACCGATTGAATGACTCGGTGAGAAATTGGGATC-------GTGA------GATTGATCTCC-TTAATTGGGGACGTTTTCGTG-AGAACTTTTTCAAACCTCGTCATTAGAGGAA------------------------------------------------------
>AB425202.1
---------------------------------------------------------------------------TATCAG-AAGTCTGAACTTCAAAACTGCGAATGGCTCATTATATCAGTTATAGTTTATTTGATAGTACCTTACTACTTGGATAACCGTAGTAATTCTAGAGCTAATACATGCAT-AAATACCCAACTATCATTTGGTGGACGGGTAGCATTTATTAGATTGAAACCAATGCAT--GGCTTCGG--CTGTGGTATTGAGTTGAATCATAATAACTGTGCGGATCGTG----CTT--TGGC-----GCGATAGATCATATAAGTTTCTGCCCTATCAGCTTTGGATGGTAGGGTATTGGCCTACCATGGCGGTAACGGGTAACGGGGAATTAGGGTTCGATTCCGGAGAGGGAGCCTGAGAAACGGCTACCACATCCAAGGAAGGCAGCAGGCGCGTAAATTACCCAATCCTAATTC-AGGGAGGTAGTGACAATAAATAACAATGC-CGGGCTTTTCAAGTCTGGCAATTGGAATGAGAACAATTTAAATCCCTTAACGAGGATCAATTGGAGGGCAAGTCTGGTGCCAGCAGCCGCGGTAATTCCAGCTCCAATAGCGTATATTAAAGTTGTTGCAGTTAAAAAGCTCGTAGTTGGATTTC--TGGAT-TGAACG---TCCGGTCCGCGTACTTTTGGTGCGTGC--GTAC--TATG-GATGTTTGT-T-CCA---TTTTACTAGAAATGTTTT---CTGCCATTAGGTTGG-TGGA-AGGCAATTTTCTAGTTCTTTTACTGTGAATAACTCAGCTTGCTCCAGAAAGGCG-TT--TGCCAAATTTTGAATGCATTAGCATGGAATAATAAGATAAGACTTTGGTGGTCTGTTTTGTTGGTTTACACA-CCAGAGTAATGATTAATAGGGACAGTT-GGGGGTATCTATATTTCAT-TGTCAGAGGTGAAATTCTTGGATCAATGAAAGATAAACTAATGCGAAAGCATTTACCAAGGATGTTTTCTTTAATCAAGAACGAAAGTTAGGGGATCGAAGATGATTAGATACCATCGTAGTCTTAACCATAAACTATGCCGACTCGGGATTGGTAGTTGTTCTA---ATTAGAATGACATTATCAGCACCGTAAGAGAAATCAAAGTCTTTGGGTTCC-GGGGGGAGTATGGTCGCAAGGCTGAAACTTAAAGGAA--TTGACGGAAGGGCACCACCAGGAGTGGAGCCTGCGGCTTAATTTGACTCAACACGGGGAAACTTACCAGGTCCAGACATAGTAA-GGATTGACAGATTGAGAGCTCTTTCTTGA-TTCTATGGGTGGTGGTGCATGG-CCGTTCTTAGTTGGTG-GAGTGATTTGTCTGGTTAATTCCGTTAACGAACGAGACCTCCGCGTGCTAAATAGTTT-CGATTGC----TTTCTTAGCAGTTCA--GAAACTTCTTAGAGGGACTTTTGGCGATT--AGCCAAAGGAAGTTGGAGGCAATAACAGGTCTGTGATGCCCTTAGATGTTCTGGGCCGCACGCGCGCTACACTGATGCGTTCAACGAGTTTATAACCTTGATCGATAGTTCTGGGTAATCTTTTGAACTCGCATCGTGCTAGGGATAGATTATTGCAATTATTAATCTTGAACGAGGAATTCCTAGTAAACGCAAGTCATCAGCTTGCATTGATTACGTCCCTGCCCTTTGTACACACCGCCCGTCGCACCTACCGATTGAATGACTCGGTGAGAAATTGGGATC-------GTGA-------GATTGCTCTCCTTTATTGGGGACGTTTTCGTG-AGAACTTTTTCAAACCTCGTCATT-------------------------------------------------------------
>Hyphochytrium_catenoides
-------------ACCTGGTTGATCCTGCCAGTAGTCATACGCTCGTCTCAAAGATTAAGCCATGCATGTCTAAGTTTAAACAACTCTATACTGTGAAACTGCGAATGGCTCATTATATCAGTTATAGTTTATTTGATAGTATCTTACTACTTGGATAACCGTAGTAATTCTAGAGCTAATACATGCATGAAAATCCCGACTT---TT----GGAAGGGATGTATTTATTAGATTGAAACCAATGCAGGGGCAACC------CTGGTATTGTGGTGAGTCATAATAACTGTGCGGATCGCATGGCCTT--GCGCCG---GCGACAAATCATTCAAGTTTCTGCCCTATCAGCTTTGGATGGTAGGGTATTGGCCTACCATGGCATTAACGGGTAACGGAGAATTAGGGTTCGATTCCGGAGAGGGAGCCTGAGAGACGGCTACCACATCCAAGGAAGGCAGCAGGCGCGTAAATTACCCAATCCTGACAC-AGGGAGGTAGTGACAATAAATAACAATGCCGGGCTTTTACAAGTCTGGCAATTGGAATGAGTACAATTTAAATCCCTTAACGAGGATCAATTGGAGGGCAAGTCTGGTGCCAGCAGCCGCGGTAATTCCAGCTCCAATAGCGTATATTAAAGTTGTTGCAGTTAAAAAGCTCGTAGTTGGATTTC--TGGCC-GGAGCG---ATCGGTCCGC---CTCATTTGGGGTGT--GTAC-TTGTGTCGTCTGTGG---CCATC-CTTGGGGAGAA--CTGTT---CTGGCATTGAGTTGT-CGGGGCAGGGAACCC-CA--TCGTTTACTGTGAAAAAATTAGAGTGTTTAAAGCACGT--TA--CGCC---GTTTGAATACATTAGCATGGAATAATAAGATAGGGCATTGGTGGTCTATTTTGTTGGTTTGCACA-CTTATGCAATGATTAATAGGGATAGTT-GGGGGTATTCGTATTTCAATTGTCAGAGGTGAAATTCTTGGATTTCTGAAAGACGAACTACTGCGAAAGCATTTACCAAGGATGTTTTCATTAATCAAGAACGAAAGTTAGGGGATCGAAGATGATTAGATACCATCGTAGTCTTAACCATAAACTATGCCGACTCGGGATTGGCGGGCGTT------CTTTTGATGACTCCGTCAGCACCGTATGAGAAATCAAAGTCTTTGGGTTCC-GGGGGGAGTATGGTCGCAAGGCTGAAACTTAAAGGAA--TTGACGGAAGGGCACCACCAGGAGTGGAGCCTGCGGCTTAATTTGACTCAACACGGGGAAACTTACCAGGTCCAGACATAGTGA-GGATTGACAGATTGAGAGCTCTTTCTTGA-TTCTATGGGTGGTGGTGCATGG-CCGTTCTTAGTTGGTG-GAGTGATTTGTCTGGTTAATTCCGTTAACGAACGAGACCTCCGCCTGCTAATTAGTTG-CGCTAAT---GCTTTGCATTGGTTTT--GCAACTTCTTAGAGGGACTTTTGGTGACT--AACCAAAGGAAGTTGGAGGCAATAACAGGTCTGTGATGCCCTTAGATGTTCTGGGCCGCACGCGCGCTACACTGATGCATTCAACGAGTTTTTAACCTTGGCTGAAGAGCCTGGGTAATCTTTTGAAAGTGCATCGTGCTAGGGATAGACCATTGCAATTATTGGTCTTGAACGAGGAATTCCTAGTAAACGCGAGTCATCAGCTCGCATTGATTACGTCCCTGCCCTTTGTACACACCGCCCGTCGCACCTACCGATTGAATGATTCGGTGAAAATTCCGGACC-------GCGG---------TCGACTGC-CCTTGGGTGATTGACC--GTG-GGAAGTTATTTAAACCTCATCATTTAGAGGAAGGTGAAGTCGTAACAAGGTTTCCGTAGGTGAACCTGCAGAAGGATCAA-----
>Developayella_elegans
------------------------------------------------------------------------------AACCTACTTTAAACGGTGAAACTGCGAACGGCTCATTATATCAGTTATAGTTTRTTTGATAGTGCCTTACTACTTGGATAACCGTAGTAATTCTAGAGCTAATACATGCTT-CAATCCCCGACTG---CTCG-CGGAAGGGGTGTATTTATTAGATCAAAACCAATGCGG----GTTCGC---CCCGGTATTGTGGTGAGTCATAATAACTGT-CTGATCGCATGGCCTT--GCGCCG---GCGATATGTCATTCAAGTTTCTGCCCTATCAGC-TAGGATGGTAGGGTATTGGCCTACCATGGCGTTAACGGGTAACGGAGAATTGGGGTTCGATTCCGGAGAGGGAGCCTGAGAGACGGCTACCACATCCAAGGAAGGCAGCAGGCGCGTAAATTACCCAATCCCAATTC-GGGGAGATAGTGACAATAAATAACAATGGCGGGCATTTTCATGTCTGCCAATTGGAATGAGAACAATTTAAATCCCTTAACGAGGATCAATTGGAGGGCAAGTCTGGTGCCAGCAGCCGCGGTAATTCCAGCTCCAATAGCGTATATTAAAGTTGTTGCAGTTAAAAAGCTCGTAGTTGGATTTC--TGGTT-GGAGAG---CTCGGTCCG---GCCCGCAAGGGCTGC--GAAC-CAGTG-GCTTCTCTG-G-CCAT--CCTTGGGCGGACGCAG-----CTGGTCTT-AGTTGA-TCGGTTGTGGGATGCCCA--TCGTTTACTGTGAAAAAATTAGAGTGTTTAAAGCAGGCT-TA--TGCC----GCTGAATACATTAGCATGGAATAATAAGATAGGACTTTGGTA--CTATTTTGTTGGTTTGCATA-CCAAGGTAATGATTAATAGGGATAGTT-GGGGGTATTCATATTTAAT-TGTCAGAGGTGAAATTCTTGGATTTATGAAAGATGAACTTATGCGAAAGCATTTACCAAGGATGTTTTCATTAATCAAGAACGAAAGTTAGGGGATCGAAGATGATTAGATACCATCGTAGTCTTAACCATAAACTATGCCGACTAGGGATCAGCAGGTGTC-------GTTTTYTGACCCTGTTGGCACCTTATGAGAAATCAAAGTCTTTGGGTTCC-GGGGGGAGTATGGTCGCAAGGCTGAAACTTAAAGGAA--TTGACGGAAGGGCACCACCAGGCGTGGAGCCTGCGGCTTAATTTGACTCAACACGGGGAAACTTACCAGGTCCAGACATAGTAA-GGATTGACAGATTGAGAGCTCTTTCTTGA-TTCTATGGGTGGTGGTGCATGG-CCGTTCTTAGTTGGTG-GAGTGATTTGTCTGGTTAATTCCGTTAACGAACGAGACCCCCGCCTGCTAAATAGTTA-CGCCAATGCATGCATTGGTGGGC-------AACTTCTTAGAGGGACTTTTGGCGACT--AGCCAAAGGAAGTTGGGGGCAATAACAGGTCTGTGATGCCCTTAGATGTTCTGGGCCGCACGCGCGCTACACTGGTGTATTCAACAAGTCTATAACCTTGACAGAGATGTCCGGGCAACCTTTTGAACGTACACCGTGCTTGGGCTAGATTGTTGCAATTTTCAATCTTAAACGAGGAATGCCTAGTAAACGCAAGTCATCAGCTTGCATTGATTACGTCCCTGCCCTTTGTACACACCGCCCGTCGCACCTACCGATTGAATGATTCGGTGAGACTTTCGGACT-------TTGACGGCGGCGCGCAAGTGC-TGC-CGACGAG-----------GGAAGTTATTCAAACCTCATCATTTAGAGGAAGGTGAAGTCGTAACAAGGTTTCYGTAGGTGAACCTGCAGCCCGGGG-------
>gi|157362107|dbj|AB284573.1|
-------------------------------GTAGTCATACGCTCGTCTCAAAGATTAAGCCATGCATGTCTAAGTATAAGCAATT-TATACAGCGAAACTGCGAATGGCTCATTATATCAGTTATAGTCTATTCGATAGTACCTTACTACTTGGATAACCGTAGTAATTCTAGAGCTAATACATGCAT-AAATACCCGACTT---TT---CGGAAGGGTAGCATTTATTAGATTGAAACCAATGC-----GCTTCGG-----CGGT-TTGTGTTGAATCATAATAACTGTGCGGATGGCA------G--CAAT-----GCCACAAATCGATTGAGTTTCTGCCCTATCAGCTTTGGATGGTAGGATATGGGCCTACCATGGCGTTAACGGGTAACGGGGAATTAGGGTTTGATTCCGGAGAGGGAGCCTGAGAAACGGCTACCACATCCAAGGAAGGCAGCAGGCGCGTAAATTACCCAATCCTAATTC-AGGGAGGTAGTGACAATAAATAACAATGCCGGGCTTTTTCAAGTCTGGCAATTGGAATGAGAACAATTTAAATCCCTTATCGAGGATCAATTGGAGGGCAAGTCTGGTGCCAGCAGCCGCGGTAATTCCAGCTCCAATAGCGTATATTAAAGTTGTTGCAGTTAAAAAGCTCGTAGTTGGATTTC--TGAAT-CGAATG---TCCGGTCGGC--TTACTAAGTAAGCTC--GTAC---AAGTGATATTTGT-T-TCATT-TTTTGTGAGGAAATTTAT---CTGTCATTAAGTTGA-TGGGTTTACGGACTTGCA--TCGTTTACTGTGAAAAAATTAGAGTGTTTAAAGCAGGCG-TT--TGCC-----TTGAATACATTAGCATGGAATAATAAGATATGACTTTGGTGGTCTACTTTGTTGGTTTGCACA-CCAGAGTAATGATTAATAGGGACAGTT-GGGGGTATTCATATTTCAG-CGTCAGAGGTGAAACTCTTAGATCGCTGAAAGATGAGCTTAGGCGAAAGCATTTACCAAGGATGTTTTCATTAATCAAGAACGAAAGTTAGGGGATCGAAGATGATTAGATACCATCGTAGCCTTAACCATAAACTATGCCGACTCGGGATTGGCAGTCGTTGAA-----TTTAATGACCTTGTCAGCACCGTATGAGAAATCAAAGTCTTTGGGTTCC-GGGGGGAGTATGGTCGCAAGGCTGAAACTTAAAGGAA--TTGACGGAAGGGCACCACCAGGAGTGGAGCCTGCGGCTTAATTTGACTCAACACGGGGAAACTTACCAGGTCCAGACATAGTAA-GGATTGACAGATTGAGAGCTCTTTCTTGA-TTCTATGGGTGGTGGTGCATGG-CCGTTCTTAGTTGGTG-GAGTGATTTGTCTGGTTAATTCCGTTAACGAACGAGACCTCCGCCTGCTAAATAGTTG-AGCTTAC-TGTTTTTTGGTAGGTTTC----GACTTCTTAGAGGGACTTTTGGCGATT--AGCCAAAGGAAGTTGGAGGCAATAACAGGTCTGTGATGCCCTTAGATGTTCTGGGCTGCACGCGCGCTACACTGGTGCACTCAACAAGTTTACAACCTTGATCGATAGGTCTGGGTAATCTTTTGAATATGCACCGTGCTAGGGATAGATTATTGCAATTATTAATCTTGAACGAGGAATTCCCAGTAAATGCAAGTCATCAGCTTGCGTTGATTACGTCCCTGCCCTTTGTACACACCGCCCGTCGCACCTACTGATTGGATGACTCGGTGAAGAATCGGGACC-------GTGA-------GAACAATCGA-TTCATTTCGAATGTACTCGTG-GGAACCTTTCTTAACCTCGTTTTCTAGAAGAAGGTGAAGTCGTAACAAGGTTTCCGTAGGTGAACCTGCGGA-------------
>gi|126364268|dbj|AB178868.1|
---------------------------------------ACGCTCGTCTCAAAGATTAAGCCATGCATGTCTAAGTATAAGCAA-TTTATACAGCGAAACTGCGAATGGCTCATTATATCAGTTATAGTCTATTCGATAGTACCTTACTACTTGGATAACCGTAGTAATTCTAGAGCTAATACATGCAT-AAATACCCGA------CTTTTCGGAAGGGTAGCATTTATTAGATTGAAACCAATGC-----GCTTCGG-----CGGT-TTGTGTTGAATCATAATAACTGTGCGGATGGCAG--------CAAT-----GCCACAAATCGATTGAGTTTCTGCCCTATCAGCTTTGGATGGTAGGATATGGGCCTACCATGGCGTTAACGGGTAACGGGGAATTAGGGTTTGATTCCGGAGAGGGAGCCTGAGAAACGGCTACCACATCCAAGGAAGGCAGCAGGCGCGTAAATTACCCAATCCTAATTC-AGGGAGGTAGTGACAATAAATAACAATGCCGGGCTTTTTCAAGTCTGGCAATTGGAATGAGAACAATTTAAATCCCTTATCGAGGATCAATTGGAGGGCAAGTCTGGTGCCAGCAGCCGCGGTAATTCCAGCTCCAATAGCGTATATTAAAGTTGTTGCAGTTAAAAAGCTCGTAGTTGGATTTC--TGAAT-CGAATG---TCCGGTCGGC--TTACTAAGTAAGCTC--GTAC---AAGTGATATTTGT-T-TCATT-TTTTGTGAGGAAATTTAT---CTGTCATTAAGTTGA-TGGGTTTACGGACTTGCA--TCGTTTACTGTGAAAAAATTAGAGTGTTTAAAGCAGGCG-TT--TGCC-----TTGAATACATTAGCATGGAATAATAAGATATGACTTTGGTGGTCTATTTTGTTGGTTTGCACA-CCAGAGTAATGATTAATAGGGACAGTT-GGGGGTATTCATATTTCAG-CGTCAGAGGTGAAATTCTTAGATCGCTGAAAGATGAGCTTAGGCGAAAGCATTTACCAAGGATGTTTTCATTAATCAAGAACGAAAGTTAGGGGATCGAAGATGATTAGATACCATCGTAGTCTTAACCATAAACTATGCCGACTCGGGATTGGCAGTCGTTGAA-----TTTAATGACCTTGTCAGCACCGTATGAGAAATCAAAGTCTTTGGGTTCC-GGGGGGAGTATGGTCGCAAGGCTGAAACTTAAAGGAA--TTGACGGAAGGGCACCACCAGGAGTGGAGCCTGCGGCTTAATTTGACTCAACACGGGGAAACTTACCAGGTCCAGACATAGTAA-GGATTGACAGATTGAGAGCTCTTTCTTGA-TTCTATGGGTGGTGGTGCATGG-CCGTTCTTAGTTGGTG-GAGTGATTTGTCTGGTTAATTCCGTTAACGAACGAGACCTCCGCCTGCTAAATAGTTG-AGCTTAC-TGTTTTTTGGTAGGTTTC----GACTTCTTAGAGGGACTTTTGGCGATT--AGCCAAAGGAAGTTGGAGGCAATAACAGGTCTGTGATGCCCTTAGATGTTCTGGGCTGCACGCGCGCTACACTGGTGCACTCAACAAGTTTACAACCTTGATCGATAGGTCTGGGTAATCTTTTGAATATGCACCGTGCTAGGGATAGATTATTGCAATTATTAATCTTGAACGAGGAATTCCTAGTAAATGCAAGTCATCAGCTTGCGTTGATTACGTCCCTGCCCTTTGTACACACCGCCCGTCGCACCTACTGATTGGATGACTCGGTGAAGAATCGGGACC-------GTGA-------GAACAATCGA-TTCATTTCGAATGTACTCGTG-GGAACCTTTCTTAACCTCGTTTTCTAGAAGAAGGTGAAGTCGTAACAAGGTTTCC------------------------------
>gi|157362114|dbj|AB284580.1|
-------------------------------GTAGTCATATGCTTGTCTCAAAGATTAAGCCATGCATGTCTAAGTATAAGCAA-TTTATACAGCGAAACTGCGAATGGCTCATTATATCAGTTATAGTCTATTCGATAGTACCTTACTACTTGGATAACCGTAGTAATTCTAGAGCTAATACATGCGT-AAATACCCGACTT---TT---TGGAAGGGTAGCATTTATTAGATTGAAACCAATGCAG----CTTCGG----CTGGT-TTGTGTTGAATCATAATAACTGTGCGGATTGCA------G--CAAT-----GCAACAAATCGATTGAGTTTCTGCCCTATCAGCTTTGGATGGTAGGATATGGGCCTACCATGGCGTTAACGGGTAACGGGGAATTAGGGTTTGATTCCGGAGAGGGAGCCTGAGAAACGGCTACCACATCCAAGGAAGGCAGCAGGCGCGTAAATTACCCAATCCTAATTC-AGGGAGGTAGTGACAATAAATAACAATGCCGGGCTTATTCAAGTCTGGCAATTGGAATGAGAACAATTTAAATCCCTTATCGAGGATCAATTGGAGGGCAAGTCTGGTGCCAGCAGCCGCGGTAATTCCAGCTCCAATAGCGTATATTAAAGTTGTTGCAGTTAAAAAGCTCGTAGTTGGATTTC--TGAAT-CGAATG---TCCGGTCCGC--TTGTTCAACAAGTGC--GTAC--TATGTGATATTTGT-T-TCATT-TTTTGTGAGGAAATTTAT---CTGTCATTAAGTTGA-TGGGTTTACGGACTTGCA--TCGTTTACTGTGAAAAAATTAGAGTGTTTAAAGCAGGCG-TT--TGCC-----TTGAATACATTAGCATGGAATAATAAGATATGACTTTGGTGGTCTATTTTGTTGGTTTGCACA-CCAGAGTAATGATTAATAGGGACAGTT-GGGGGTATTCATATTTCAG-CGTCAGAGGTGAAATTCTTAGATCGCTGAAAGATGAGCTTAGGCGAAAGCATTTACCAAGGATGTTTTCATTAATCAAGAACGAAAGTTAGGGGATCGAAGATGATTAGATACCATCGTAGTCTTAACCATAAACTATGCCGACTCGGGATTGGCAGTCGTTGAA-----TTTAATGACCTTGTCAGCACCGTATGAGAAATCAAAGTCTTTGGGTTCC-GGGGGGAGTATGGTCGCAAGGCTGAAACTTAAAGGAA--TTGACGGAAGGGCACCACCAGGAGTGGAGCCTGCGGCTTAATTTGACTCAACACGGGGAAACTTACCAGGTCCAGACATAGTAA-GGATTGACAGATTGAGAGCTCTTTCTTGA-TTCTATGGGTGGTGGTGCATGG-CCGTTCTTAGTTGGTG-GAGTGATTTGTCTGGTTAATTCCGTTAACGAACGAGACCTCCGCCTGCTAAATAGTTG-AGCTTAC-TGTTTTTTGGTAGGTTTC----GACTTCTTAGAGGGACTTTTGGCGATT--AGCCAAAGGAAGTTGGAGGCAATAACAGGTCTGTGATGCCCTTAGATGTTCTGGGCTGCACGCGCGCTACACTGGTGCACTCTTTNAGTTTACAACCTTGATCGATAGGTCTGGGTAATCTTTTGAATATGCACCGTGCTAGGGATAGATTATTGCAATTATTAATCTTGAACGAGGAATTCCTAGTAAATGCAAGTCATCAGCTTGCGTTGATTACGTCCCTGCCCTTTGTACACACCGCCCGTCGCACCTACTGATTGGATGACTCGGTGAAGAATCGGGACC-------GTGA-------GAACAATCGA-TTCATTTCGA-TGTACTCGTG-GGAACCTTTCTTAACCTCGTTTTCTAGAAGAAGGTGAAGTCGTAACAAGGTTTCCGTAGGTGAACCTGCGGA-------------
>gi|157362113|dbj|AB284579.1|
-------------------------------GTAGTCATACGCTCGTCTCAAAGATTAAGCCATGCATGTCTAAGTATAAGCAA-TTTATACAGCGAAACTGCGAATGGCTCATTATATCAGTTATAGTCTATTCGATAGTACCTTACTACTTGGATAACCGTAGTAATTCTAGAGCTAATACATGCAT-AAATACCCGACTC---AC-----GAAGGGTAGCATTTATTAGATTGAAACCAATGCAG----CTTCGG----CTGGT-TTGTGTTGAATCATAATAACTGTGCGAATCGCG----CTC--GTC------GCGATAAATCGATTGAGTTTCTGCCCTATCAGCTTTGGATGGTAGGATATGGGCCTACCATGGCGTTAACGGGTAACGGGGAATTAGGGTTTGATTCCGGAGAGGGAGCCTGAGAAACGGCTACCACATCCAAGGAAGGCAGCAGGCGCGTAAATTACCCAATCCTAATTC-AGGGAGGTAGTGACAATAAATAACAATGCCGGGCTTATTCAAGTCTGGCAATTGGAATGAGAACAATTTAAATCCCTTATCGAGGATCAATTGGAGGGCAAGTCTGGTGCCAGCAGCCGCGGTAATTCCAGCTCCAATAGCGTATATTAAAGTTGTTGCAGTTAAAAAGCTCGTAGTTGGATTTC--TGAAT-CGAATG---TCCGGTCCGCTTGTTTCATACAAGTGC--GTAC--TATGTGATATTTGT-T-TCATT-TTTTGTGAGGAAATTTTT---CTGTCATTAAGTTGG-TGGAATTATGGACTTGCA--TCTTTTACTGTGAAAAAATTAGAGTGTTTAAAGCAGGCG-TT--TGCC----ATTGAATACATTAGCATGGAATAATAAGATATGACTTTGGTGGTCTATTTTGTTGGTTTGCACA-CCAGAGTAATGATTAATAGGGACAGTT-GGGGGTATTCATATTTCAG-CGTCAGAGGTGAAATTCTTAGATCGCTGAAAGATGAGCTTAGGCGAAAGCATTTACCAAGGATGTTTTCATTAATCAAGAACGAAAGTTAGGGGATCGAAGATGATTAGATACCATCGTAGTCTTAACCATAAACTATGCCGACTCGGGATTGGCAGTCGTTGAA-----TTTAATGACCTTGTCAGCACCGTATGAGAAATCAAAGTCTTTGGGTTCC-GGGGGGAGTATGGTCGCAAGGCTGAAACTTAAAGGAA--TTGACGGAAGGGCACCACCAGGAGTGGAGCCTGCGGCTTAATTTGACTCAACACGGGGAAACTTACCAGGTCCAGACATAGTAA-GGATTGACAGATTGAGAGCTCTTTCTTGA-TTCTATGGGTGGTGGTGCATGG-CCGTTCTTAGTTGGTG-GAGTGATTTGTCTGGTTAATTCCGTTAACGAACGAGACCTCCGCCTGCTAAATAGTTG-AGCTTAC-TGTTTTTTGGTAGGTTTC----GACTTCTTAGAGGGACTTTTGGCGATT--AGCCAAAGGAAGTTGGAGGCAATAACAGGTCTGTGATGCCCTTAGATGTTCTGGGCTGCACGCGCGCTACACTGGTGCACTCAACAAGTTTACAACCTTGACCGATAGGTCTGGGTAATCTTTTGAATATGCACCGTGCTAGGGATAGATTATTGCAATTATTAATCTTGAACGAGGAATTCCTAGTAAATGCAAGTCATCAGCTTGCGTTGATTACGTCCCTGCCCTTTGTACACACCGCCCGTCGCACCTACTGATTGGATGACTCGGTGAAGAATCGGGACC-------GTGA-------GAACAATCGA-TTCATTTCGAATGTACTCGTG-GGAACCTTTCTTAACCTCGTTTTCTAGAAGAAGGTGAAGTCGTAACAAGGTTTCCGTAGGTGAACCTGCGGA-------------
>AB284578.1
-------------------------------GTAGTCATACGCTCGTCTCAAAGATTAAGCCATGCATGTCTAAGTATAAGCAAAT-TGTACTGTGAAACTGCGAATGGCTCATTATATCAGTTATAGTCTATTTGATAGTACCTTACTACTTGGATAACCGTAGTAATTCTAGAGCTAATACATGCAT-ACATACTCGACTT---TT---TGGAAGAGTAGCATTTATTAGATTGAAACCAATGCAG----CTTCGG----CTGGTATTGTGTTGAGTCATAATAACTGTGCGGATCGCA-----TT--CTAT-----GCGATAAATCAATTGAGTTTCTGCCCTATCAGCTTTGGATGGTAGGATATGGGCCTACCATGGCGTTAACGGGTAACGGGGAATTAGGGTTTGATTCCGGAGAGGGAGCCTGAGAAACGGCTACCACATCCAAGGAAGGCAGCAGGCGCGTAAATTACCCAATCCTAATTC-AGGGAGGTAGTGACAATAAATAACAATGC-CGGGCTTTATAAGTCTGGCAATTGGAATGAGAACAATTTAAATCCCTTAACGAGGATCAATTGGAGGGCAAGTCTGGTGCCAGCAGCCGCGGTAATTCCAGCTCCAATAGCGTATATTAAAGTTGTTGCAGTTAAAAAGCTCGTAGTTGGATTTC--TGAAT-TGAATG---TCCGGTCCGCTTATCTCAGATGAGTGT--GTACTTTA---GATATTTGG-T-TCATT-TTTTGTGAGGATATTTAT---CTGTCATTAAGTTGA-TGGATTTATAGACTTGCA--TCATTTACTGTGAAAAAATTAGAGTGTTTAAAGCAGGCG-TT--TGCC--CATTTGAATACATTAGCATGGAATAATAAGATATGACTTTGGTGGTCTATTTTGTTGGTTTGCACA-CCAGAGTAATGATTAATAGGGACAGTT-GGGGGTATTCATATTTCAA-CGTCAGAGGTGAAATTCTTAGATCGTTGAAAGATGAGCTTAGGCGAAAGCATTTACCATGGATGTTTTCATTAATCAAGAACGAAAGTTAGGGGATCGAAGATGATTAGATACCATCGTAGTCTTAACCATAAACTATGCCGACTCGGGATTGGCAGTCGTT-GA---ATTTTAATGACCTTGTCAGCACCGTATGAGAAATCAAAGTCTTTGGGTTCC-GGGGGGAGTATGGTCGCAAGGCTGAAACTTAAAGGAA--TTGACGGAAGGGCACCACCAGGAGTGGAGCCTGCGGCTTAATTTGACTCAACACGGGGAAACTTACCAGGTCCAGACATAGTAA-GGATTGACAGATTGAGAGCTCTTTCTTGA-TTCTATGGGTGGTGGTGCATGG-CCGTTCTTAGTTGGTG-GAGTGATTTGTCTGGTTAATTCCGTTAACGAACGAGACCTCCGCCTGCTAAATAGTCT-AGCTTAC-TGTTTTTTGGTAGGTGTA----GACTTCTTAGAGGGACTTTTGGCGATT--AGCCAAAGGAAGTTGGAGGCAATAACAGGTCTGTGATGCCCTTAGATGTTCTGGGCCGCACGCGCGCTACACTGGTGCGTTCAACAAGTTTACAACCTTGATTGACAAGTCTGGGTAATCTTTTGAATGCGCACCGTGCTAGGGATAGATTATTGCAATTATTAATCTTGAACGAGGAATTCCTAGTAAACGCAAGTCATCAGCTTGCATTGATTACGTCCCTGCCCTTTGTACACACCGCCCGTCGCACCTACTGATTGAATGACTCGGTGAAAAATTGGGACT-------GTGA-------GAACAATCGA-TTCATTTCGAATGTACTCGTG-GGAACTTTTTTTAACCTCGCCATTTAGAAGAAGGTGAAGTCGTAACAAGGTTTCCGTAGGTGAACCTGCGGA-------------
>O.muelleri
-----------------------------------------------------------------------------------------------------------------------------TAGTCTATTTGATAGTACCTTACTACTTGGATACCCGTAGTAATTCTAGAGCTAATACATGCAA-AAATACCCAACTG---TTCG-CGGACGGGTAGCATTTATTAGATTTAAACC----------TTCTCGGCTTGCCGAAGTTGTGTTGAGTCATAATAACTGTGCGGATCGCA------T--TTAT-----GCGATGAATCAATTGAGTTTCTGCCCTATCAGCTTTGGATGGTAGGATATGGGCCTACCATGGCATTAACGGGTAACGGGGAATTAGGGTTTGATTCCGGAGAGGGAGCCTTAGAAACGGCTACCACATCCAAGGAAGGCAGCAGGCGCGTAAATTACCCAATCCTGACAC-AGGGAGGTAGTGACAATAAATAACAATGCCGGGCTTTTTTAAGTCTAGCAATTGGAATGAGAACAATTTAAATCCCTTAACGAGGATCAATTGGAGGGCAAGTCTGGTGCCAGCAGCCGCGGTAATTCCAGCTCCAATAGCGTATATTAAAGTTGTTGCAGTTAAAAAGCTCGTAGTTGGATTTC--TGTTT-TTAGTT---ACCGGTCCGCC-CATGTATTTGGGTGT--GTAC--TATG-GTTACTGAA-T-TCATT-TTTTGTGAGGATCCTTGG---CTGGCATTAAGTTGTCCGGCCTTGTGTACTTGCA--TCTTTTACTGTGAAAAAATTAGAGTGTTTAAAGCAGGCG-TT--CGCT-TTATTTGAATACATTAGCATGGAATAATAAGATACGACTTGTGTGGTCTATTTTGTTGGTTTGCACA-CGCGAGTAATGATTAATAGGGACAGTT-GGGGGTATTCATATTTCAG-CGTCAGAGGTGAAATTCTTGGATCGCTGAAAGATGAGCTTAGGCGAAAGCATTTACCATGGATGTTTTCATTAATCAAGAACGAAAGTTAGGGGATCGAAGATGATTAGATACCATCGTAGTCTTAACCATAAACTATGCCGACTCGAGATTGGCAGTCGTTATT--------AATGACCTTGTCAGCATCGTATGAGAAATCAAAGTCTTTGGGTTCC-GGGGGGAGTATGGTCGCAAGGCTGAAACTTAAAGGAA--TTGACGGAAGGGCACCACCAGGAGTGGAGCCTGCGGCTTAATTTGACTCAACACGGGGAAACTTACCAGGTCCAGACATAGTAA-GGATTGA--------------------------------------------------------------------------------------------------------------------------------------------------------------------------------------------------------------------------------------------------------------------------------------------------------------------------------------------------------------------------------------------------------------------------------------------------------------------------------------------------------------------------------------------------------------------------------------------------------------------------
>Olpidiopsis_polysiphoniae
----------------TGGTTGATCCTGCCAGTAGTCATACGCTCGTCTCAAAGATTAAGCCATGCATGTCTAAGTATAAACAATTTTGTACTGTGAAACTGCGAATGGCTCATTATATCAGTTATAGTCTATTTGATAGTACCTTACTACTTGGATACCCGTAGTAATTCTAGAGCTAATACATGCAA-AAATACCCAACTG----TTCGCGGACGGGTAGCATTTATTAGATTTAAACC----------TTCTCGGCTTGCCGAAGTTGTGTTGAGTCATAATAACTGTGCGGATCGCA------T--TTAT-----GCGATGAATCAATTGAGTTTCTGCCCTATCAGCTTTGGATGGTAGGATATGGGCCTACCATGGCATTAACGGGTAACGGGGAATTAGGGTTTGATTCCGGAGAGGGAGCCTTAGAAACGGCTACCACATCCAAGGAAGGCAGCAGGCGCGTAAATTACCCAATCCTGACAC-AGGGAGGTAGTGACAATAAATAACAATGCCGGGCTTTTTTAAGTCTAGCAATTGGAATGAGAACAATTTAAATCCCTTAACGAGGATCAATTGGAGGGCAAGTCTGGTGCCAGCAGCCGCGGTAATTCCAGCTCCAATAGCGTATATTAAAGTTGTTGCAGTTAAAAAGCTCGTAGTTGGATTTC--TGTTT-TTAGTT---ACCGGTCCGCC-CATGTATTTGGGTGT--GTAC--TATG-GTTACTGAA-T-TCATT-TTTTGTGAGGATCCTTGG---CTGGCATTAAGTTGTCCGGCCTTGTGTACTTGCA--TCTTTTACTGTGAAAAAATTAGAGTGTTTAAAGCAGGCG-TT--CGCT-TTATTTGAATACATTAGCATGGAATAATAAGATACGACTTGTGTGGTCTATTTTGTTGGTTTGCACA-CGCGAGTAATGATTAATAGGGACAGTT-GGGGGTATTCATATTTCAG-CGTCAGAGGTGAAATTCTTGGATCGCTGAAAGATGAGCTTAGGCGAAAGCATTTACCATGGATGTTTTCATTAATCAAGAACGAAAGTTAGGGGATCGAAGATGATTAGATACCATCGTAGTCTTAACCATAAACTATGCCGACTCGAGATTGGCAGTCGTTATT--------AATGACCTTGTCAGCATCGTATGAGAAATCAAAGTCTTTGGGTTCC-GGGGGGAGTATGGTCGCAAGGCTGAAACTTAAAGGAA--TTGACGGAAGGGCACCACCAGGAGTGGAGCCTGCGGCTTAATTTGACTCAACACGGGGAAACTTACCAGGTCCAGACATAGTAA-GGATTGACAGATTGAGAGCTCTTTCTTGA-TTCTATGGGTGGTGGTGCATGG-CCGTTCTTAGTTGGTG-GAGTGATTTGTCTGGTTAATTCCGTTAACGAACGAGACCCCCGCCTGCTAAATAGTTT-GGCTTAC----AATTTTGTAGGTG----CAGACTTCTTAGAGGGACTTTTGGCGATT--AGCCAAAGGAAGTTGGGGGCAATAACAGGTCTGTGATGCCCTTAGATGTTCTGGGCCGCACGCGCGCTACACTGATACGTTCAACGAGTTTATAACCTTGATCGATAGATCTGGGTAATCTTTTGAATGCGTATCGTGCTAGGGATAGATTATTGCAATTATTAATCTTGAACGAGGAATTCCTAGTAAACGCAAGTCATCAGCTTGCATTGATTACGTCCCTGCCCTTTGTACACACCGCCCGTCGCACCTACCGATTGAATGACTCGGTGAAAAATTGGGACT-------GTGA-------TTTCGCTTGC-TTCATTGCAAGCCTAATTGTG-GGAACTTTCTTTAACCTATTTATTTAGAGGAAGGKGAAGTCGTAACAAGGTTTCCGTAGGTGAACCTGCAGAAGGAT--------
>KM210530
-------------------------------------------------------------------------------------------------------------------------------------------------------------------------------------------------TACCCAACTG---TTCG-CGGACGGGTAGCATTTATTAGATTGAAACC----------TTCTCGGCTTGCCGAAGTTGTGTTGAGTCATAATAACTGTGCGGATCGCA-----TT--TAAT-----GCGATGAATCAATTGAGTTTCTGCCCTATCAGCTTTGGATGGTAAGATATGGGCTTACCATGGCATTAACGGGTAACGGGGAATTAGGGTTTGATTCCGGAGAGGGAGCCTTAGAAACGGCTACCACATCCAAGGAAGGCAGCAGGCGCGTAAATTACCCAATATCAATTC-GATGAGGTAGTGACAATAAATAACAATGCCGGGCTTTTTCAAGTCTGGCAATTGGAATGAGAACAATTTAAATCCCTTAACGAGGATCAATTGGAGGGCAAGTCTGGTGCCAGCAGCCGCGGTAATTCCAGCTCCAATAGCGTATATTAAAGTTGTTGCAGTTAAAAAGCTCGTAGTTGGATTTC--TGTTT-TTAATT---ACCGGTCCGTT-CATGTATTTGAATGT--GTAC--TATG-GTTATTGAA-T-TCAT--TTTTGCGAGGATCCTTAT---CTAGCATTAAGTTGT-TGGGTTTGTGTACTTGCA--TCTTTTACTGTGAAAAAATTAGAGTGTTTAAAGCAGGCG-TT--CGCC---TATTGAATACATTAGCATGGAATAATAAGATACGACTTGTGTTGTCTATTTTGTTGGTTTGCACA-CGCGAGTAATGATTAATAGGGACAGTT-GGGGGTATTCATATTTCAG-CGTCAGAGGTGAAATTCTTGGATCGCTGAAAGATGAGCTTAGGCGAAAGCATTTACCATGGATGTTTTCATTAATCAAGAACGAAAGTTAGGGGATCGAAGATGATTAGATACCATCGTAGTCTTAACCATAAACTATGCCGACTCGGGATTGGCAGTCGTTATT--------AATGACCTTGTCAGCACCGTATGAGAAATCAAAGTCTTTGGGTTCC-GGGGGGAGTATGGTCGCAAGGCTGAAACTTAAAGGAA--TTGACGGAAGGGCACCACCAGGAGTGGAGCCTGC------------------------------------------------------------------------------------------------------------------------------------------------------------------------------------------------------------------------------------------------------------------------------------------------------------------------------------------------------------------------------------------------------------------------------------------------------------------------------------------------------------------------------------------------------------------------------------------------------------------------------------------------------------------------------------
>AB363063_O._bostrychiae
--------------------------------TAGTCATACGCTCGTCTCAAAGATTAAGCCATGCATGTCTAAGTATAAACAATTTTGTACTGTGAAACTGCGAATGGCTCATTATATCAGTTATAGTCTATTTGATAGTACCTTACTACTTGGATACCCGTAGTAATTCTAGAGCTAATACATGCAT-AAATACCCAACTT---TT---TGGACGGGTAGCATTTATTAGATTGAAACC----------TTCTCGGCTTGCCGAAGTTGTGTTGAGTCATAATAACTGTGCGGATCGCA-----TT--GAAT-----GCGATGAATCAATTGAGTTTCTGCCCTATCAGCTTTGGATGGTAGGATATGGGCCTACCATGGCATTAACGGGTAACGGGGAATTAGGGTTTGATTCCGGAGAGGGAGCCTTAGAAACGGCTACCACATCCAAGGAAGGCAGCAGGCGCGTAAATTACCCAATCCTGACAC-AGGGAGGTAGTGACAATAAATAACAATGCCGGGCTTTTTCAAGTCTGGCAATTGGAATGAGAACAATTTAAATCCCTTAACGAGGATCAATTGGAGGGCAAGTCTGGTGCCAGCAGCCGCGGTAATTCCAGCTCCAATAGCGTATATTAAAGTTGTTGCAGTTAAAAAGCTCGTAGTTGGATGTC--TGTTT-TTAGTT---ACCGGTCCGCT-CATGTATTTGAGTGT--GTAC-TTGTG---TTTCTGA-ATTCAT--TTTTGTGAGGATCCTTGG---CTGGCATTAAGTTGTCCGGCCTTGTGTACTTGCA--TCTTTTACTGTGAAAAAATTAGAGTGTTTAAAGCAGGCG-TT--CGCT---TCTTGAATACATTAGCATGGAATAATAAGATATGACTTGTGTGGTCTATTTTGTTGGTTTGCACA-CGCGAGTAATGATTAATAGGGACAGTT-GGGGGTATTCATATTTCAG-CGTCAGAGGTGAAATTCTTGGATCGCTGAAAGATGAGCTTAGGCGAAAGCATTTACCATGGATGTTTTCATTAATCAAGAACGAAAGTTAGGGGATCGAAGATGATTAGATACCATCGTAGTCTTAACCATAAACTATGCCGACTCGGGATTAGCAGTCGTT------CTT---ATGACTCTGTTAGCACCGTATGAGAAATCAAAGTCTTTGGGTTCC-GGGGGGAGTATGGTCGCAAGGCTGAAACTTAAAGGAA--TTGACGGAAGGGCACCACCAGGAGTGGAGCCTGCGGCTTAATTTGACTCAACACGGGGAAACTTACCAGGTCCAGACATAGTAA-GGATTGACAGATTGAGAGCTCTTTCTTGA-TTCTATGGGTGGTGGTGCATGG-CCGTTCTTAGTTGGTG-GAGTGATTTGTCTGGTTAATTCCGTTAACGAACGAGACCTCCGCCTGCTAAATAGTTT-GGCCTAC-AA---TTTTGTAGGTG----CAGACTTCTTAGAGGGACTTTTGGCGATT--AGCCAAAGGAAGTTGGAGGCAATAACAGGTCTGTGATGCCCTTAGATGTTCTGGGCCGCACGCGCGCTACACTGATACGTTCAACGAGTTTATAACCTTGATTGATAGATCTGGGTAATCTTTTGAATGCGTATCGTGCTAGGGATAGATTATTGCAATTATTAATCTTGAACGAGGAATTCCTAGTAAACGCAAGTCATCAGCTTGCATTGATTACGTCCCTGCCCTTTGTACACACCGCCCGTCGCACCTACCGATTGAATGACTCGGTGAAAAATCGGGACT-------GTGG-------TCTCACTTGC-TTCATTGCGAGTTTGACTGTG-GGAACTTTCTTTAACCTATTCATTT------------------------------------------------------------
>Olpidiopsis_pyropiae
-------------------------------------------------------------CATGCATGTCTAAGTATAAACAA-TTTATACAGTGAAACTGCGAATGGCTCATTATATCAGTTATAGTCTACTTGATAGTACCTTACTACTTGGATAACCGTAGTAATTCTAGAGCTAATACATGCGC-AAATACCCGACTG---CTCG-CGGAAGGGTAGCATTTATTAGATTGAAACCAATACAG----CTT------GCTGTTTTTGAGTTGAGTCATAATAACTGTGCGGATCGT-----TTT--TTAA-----ACGATAAATCAATTGAGTTTCTGCCCTATCAGCTTTGGATGGTAGGATATGGGCCTACCATGGCATTAACGGGTAACGGGGAATTAGGGTTTGATTCCGGAGAGGGAGCCTTAGAAACGGCTACCACATCCAAGGAAGGCAGCAGGCGCGTAAATTACCCAATCTTGACAC-AAGGAGGTAGTGACAATAAATAACAAAGCCGGGCTTTTTCAAGTCTGGCTATTGGAATGAGAACAATTTAAATCCCTTAACGAGGATCAATTGGAGGGCAAGTCTGGTGCCAGCAGCCGCGGTAATTCCAGCTCCAATAGCGTATATTAAAGTTGTTGCAGTTAAAAAGCTCGTAGTTGGATTTC--TGTTT-TGGGTA---TCCGGTCAGT------TCAATGAACTC--GTAC--TATG-GAAACTCGA-A-GCATG-TTTGGCGTAGTTTGTGGG---CTGGTATTCATTTAT-TGGCTCATTAAACTTGCC--TCGTTTACTGTGAATAAATTAGAGTGTTTAAAGCAGGCG-TT--TGCA-----TTGAATACATTAGCATGGAATAATAAGATACGACTCAGGTGGTCTATTTTGTTGGTTTGCACA-CCAGAGTAATGATTAATAGGGACAGTT-GGGGGTATTCATATTTCAG-CGTCAGAGGTGAAATTCTTAGATCGCTGAAAGATGAGCTTAGGCGAAAGCATTTACCATGAATGTTTTCATTAATCAAGAACGAAAGTTAGGGGATCGAAGATGATTAGATACCATCGTAGTCTTAACCATAAACTATGCCGACTCGGGATTGGCAGTCGTT-------ATTTAATGACCTTGTCAGCACCGTATGAGAAATCAAAGTCTTTGGGTTCC-GGGGGGAGTATGGTCGCAAGGCTTAAACTTAAAGGAA--TTGACGGAAGGGCACCACCAGGAGTGGAGCCTGCGGCTTAATTTGACTCAACACGGGAAAACTTACCAGGTCCAGACATAGTAA-GGATTGACAGATTGAGAGCTCTTTCTTGA-TTCTATGGGTGGTGGTGCATGG-CCGTTCTTAGTTGGTG-GAGTGATTTGTCTGGTTAATTCCGTTAACGAACGAGACCCCCGCCTGCTAAATAGTAC-CGCTTTT-AA--TTTTTAAAGGTT----GGTACTTCTTAGAGGGACTTTTGGCGATT--AGCCAAAGGAAGTTGGGGGCAATAACAGGTCTGTGATGCCCTTAGATGTTCTGGGCCGCACGCGCGCTACACTGATGCGTTCAACAAGTTTACAACCTTGACTGATAGGTCTGGGTAATCTTTTGAATGCGCATCGTGCTAGGGATAGATTATTGCAATTATTAATCTTGAACGAGGAATTCCTAGTAAACGCAAGTCATCAGCTTGCATTGATTACGTCCCTGCCCTTTGTACACACCGCCCGTCGCACCTAACGATTGAATTACTCGGTGAAATATCAGGACC-------ATTG-------TTGAGGTTGA-TTCATTTCGATCTCGGTGAAG-GGAATAATATTAAACCTAGTAATTTAGAGTTCGGTGAAGTCGTAACAAGGTTTCCGTAGGTGAACCTGCGGAAGGATCATTA---
>EF100297
-----------TAACCTGGTTGATCCTGCCAGAGGTCATACGCTTGTCTCAAAGATTAAGCCATGCATGTCTAAGTATAAACAA--TTATACAGTGAAACTGCGAATGGCTCATTATATCAGTTTTAGCCTACTTGATAGTACC-TACTACTTGGATAACCGTAGTAATTCTAGAGCTAATACATGCAT-AAATACCCAACTG---TT--ATGGACGGGTAGCATTTATTAGATTGAAACCAAT-------CCTT------TATGGTATTGAGTTGAGTCATAATAATTGTGCGGATCG------TTT--TCGA-----GCGATGAATCAAATGGGATTCTGCCCTATCAGCTTTGGTTGGGTGTGTATTGGACACCCAAGGCATTCACGGGT-ACGGGGAATCAGGGTTTGATTCCGGAGAGGGAGCCTGAGAAACGGCTACCACATCCAAGGAAGGCAGCAGGCGCGTAAATTACCCAATCCTGACAC-AGGGAGGTAGTGACAATAAATAACAATGCCGGGCTTTTTTAAGTCTGGCAATTGGAATGAGAACAATTTAAATCCCTTAACGAGGATCAATTGAAGGGCAAGTCTGGTGCCAGCAGCCGCGGTAATTCCAGCTTCAATAGCGTATATCTAAGTTGTTGCAGTTAAAAAGCTCGTAGTTGGATATC--TGTGT-TGGATA---TTGGGTC---------TTGGGAAACCGAGTTAC-TTCAG---TATTTGG-C-ATATA-TTTTGTGAGGCTCCATT----CTGGCATTAAGTTGT-TGGTTTGATAGGCTTGCA--TCGTTTACTGTGAAAAAATTAGAGTGTTTCAAGCAGGTG-TT--TGCT----TTTAAATACATTAGCATGGAATAATAAGATATGACTTGTGTGGTCTATTTTGTTGGTTTGCACA-CGCAAGTAATGATTAATAGGGACAGTT-GGGGGTATTCATATTTCAG-TGTCAGAGGTGAAATTCTTGGATCGCTGAAAGATGAGCTTAGGCGAAAGCATTTACCATGGATGTTTTCATTAATCAAGAACGAAAGTTAGGGGATCGAAGATGATTAGATACCATCGTAGTCTTAACCATAAACTATGCCGACTCGGGATTGGCAGTCGTTGAA-------TAATGACCTTGTCAGCACCGTATGAGAAATCAAAGTCTTTGGGTTCC-GGGGAGAGTATGATCGCAAGGTTGAAATTTAAAGAAA--TTGACGGAAGGGCACCACCAGGAGTGGAGCCTGCGGCTTAATTTGACTCAACACGGGGAAACTTACCAGGTCCAGACATAGTAA-GGATTGACAGATTGAGAGCTCTTTCTTGA-TTCTATGGGAAGTGGTGCATGG-CCGTTTGCAGTTGGTGTTAGTGAAATGTCTCCTTAATTGAGATAACGAACGAGACCTTAACCTA------------------------------------------------------------------------------------------------------------------------------------------------------------------------------------------------------------------------------------------------------------------------------------------------------------------------------------------------------------------------------------------------------------------------------------------------------------------------------------------------------------
>A_rosen_Ros_18S
-----------------------------------------------------------------------------------------------------------------------------------------------------------------------------------ATACATGCAT-AAATACCCAACTG-----TTATGGACGGGTAGCATTTATTAGATTGAAACCAAT-------CCTT------TATGGTATTGAGTTGAGTCATAATAACTGTGCGGATCG------TTT--TCGA-----GCGATGAATCAAATGGGATTCTGCCCTATCAGCTTTGGTTGGGTGTGTATTGGACACCCAAGGCATTAACGGGT-ACGGGGAATCGGGGTTTGATTCCGGAGAGGGAGCCTGAGAAACGGCTACCACATCCAAGGAAGGCAGCAGGCGCGTAAATTACCCAATCCTGACAC-AGGGAGGTAGTGACAATAAATAACAATGCCGGGCTTTTTTAAGTCTGGCAATTGGAATGAGAACAATTTAAATCCCTTAACGAGGATCAATTGAAGGGCAAGTCTGGTGCCAGCAGCCGCGGTAATTCCAGCTTCAATAGCGTATATCTAAGTTGTTGCAGTTAAAAAGCTCGTAGTTGGATTTC--TGTGT-TGGACT---CTGGGTC---------TTGGGAAACCGAGTTAC-TTCAG---TGTTTGG-C-ATATA-TTTTGTGAGGCTCCATT----CTGGCATTAAGTTGT-TGGTTTGACAGGCTTGCA--TCGTTTACTGTGAAAAAATTAGAGTGTTTCAAGCAGGCG-TT--TGCT----TTTAAATACATTAGCATGGAATAATAAGATATGACTTGTGTGGTCTATTTTGTTGGTTTGCACA-CGCAAGTAATGATTAATAGGGACAGTT-GGGGGTATTCATATTTCAG-TGTCAGAGGTGAAATTCTTGGATCGCTGAAAGATGAGCTTAGGCGAAAGCATTTACCATGGATGTTTTCATTAATCAAGAACGAAAGTTAGGGGATCGAAGATGATTAGATACCATCGTAGTCTTAACCATAAACTATGCCGACTCGGGATTGGCAGTCGTTGAA-------TAATGACCTTGTCAGCACCGTATGAGAAATCAAAGTCTTTGGGTTCC-GGGGAGAGTATGATCGCAAGGTTGAAATTTAAAGAAA--TTGACGGAAGGGCACCACCAGGAGTGGAGCCTGCGGCTTAATG---------------------------------------------------------------------------------------------------------------------------------------------------------------------------------------------------------------------------------------------------------------------------------------------------------------------------------------------------------------------------------------------------------------------------------------------------------------------------------------------------------------------------------------------------------------------------------------------------------------------------------------------------------------------------
>EF100276
-----------TAATCTGGTTGATCCTGCCAGAGGTCATACGCTTGTCTCAAAGATTAAGCCATGCATGTCTAAGTATAAACAA--TTATACAGTGAAACTGCGAATGGCTCATTATATCAGTTTTAGCCTACTTGATAGTACC-TACTACTTGGATAACCGTAGTAATTCTAGAGCTAATACATGCAT-AAATACCCAACTG---TT--ATGGACGGGTAGCATTTATTAGATTGAAACCAAT-------CCTT------TATGGTATTGAGTTGAGTCATAATAACTGTGCGGATCG------TTT--TCGA-----GCGATGAATCAAATGGGATTCTGCCCTATCAGCTTTGGTTGGGTGTGTATTGGACACCCATGGCATTGACGGGT-ACGGGGAATTAGGGTTTGATTCCGGAGAGGGAGCCTGAGAAACGGCTACCACATCCAAGGAAGGCAGCAGGCGCGTAAATTACCCAATCCTGACAC-AGGGAGGTAGTGACAATAAATAACAATGCCGGGCTTTTTTAAGTCTGGCAATTGGAATGAGAACAATTTAAATCCCTTAACGAGGATCAATTGAAGGGCAAGTCTGGTGCCAGCAGCCGCGGTAATTCCAGCTTCAATAGCGTATATCTAAGTTGTTGCAGTTAAAAAGCTCGTAGTTGGATATC--TGTGT-TGGATA---TTGGGTC----------TTGGGAAACC--GAGTTACTTC-AATATTTGG-C-ATATA-TTTTGTGAGGCTCCATT----CTGGCATTAAGTTGT-TGGTTTGATAGGCTTGCA--TCGTTTACTGTGAAAAAATTAGAGTGTTTCAAGCAGGCG-TT--TGCT----TTTAAATACATTAGCATGGAATAATAAGATATGACTTGTGTGGTCTATTTTGTTGGTTTGCACA-CGCAAGTAATGATTAATAGGGACAGTT-GGGGGTATTCATATTTCAG-TGTCAGAGGTGAAATTCTTGGATCGCTGAAAGATGAGCTTAGGCGAAAGCATTTACCATGGATGTTTTCATTAATCAAGAACGAAAGTTAGGGGATCGAAGATGCTTAGATACCATCGTAGTCTTAACCATAAACTATGCCGACTCGGGATTGGCAGTCGTT-GA---AT---AATGACCTTGTCAGCACCGTATGAGAAATCAAAGTCTTTGGGTTCC-GGGGAGAGTATGATCGCAAGGTTGAAATTTAAAGAAA--TTGACGGAAGGGCACCACCAGGAGTGGAGCCTGCGGCTTAATTTGACTCAACACGGGGAAACTTACCAGGTCCAGACATAGTAA-GGATTGACAGATTGAGAGCTCTTTCTTGA-TTCTATGGGAAGTGGTGCATGG-CCGTTTGCAGTTGGTGTTAGTGAAATGTCTCCTTAATTGAGATAACGAACGAGACCTCAACCTA------------------------------------------------------------------------------------------------------------------------------------------------------------------------------------------------------------------------------------------------------------------------------------------------------------------------------------------------------------------------------------------------------------------------------------------------------------------------------------------------------------
>18s_AN_QU_long
-------------------------------------------------------------------------------------------------------------------------------------------------TACTACTTGGATAACCGTAGTAATTCTAGAGCTAATACATGCAT-AAATACCCAACTG---TT--ATGGACGGGTAGCATTTATTAGATTGAAACCAAT-------CCCTTAG-----TGGTATTGAGTTGAGTCATAATAACTGTGCGGATCG------TTT--TCGA-----GCGATGAATCAAATGGGATTCTGCCCTATCAGCTTTGGTTGGGTGTGTATTGGACACCCAAGGCATTAACGGGT-ACGGGGAATCGGGGTTTGATTCCGGAGAGGGAGCCTGAGAAACGGCTACCACATCCAAGGAAGGCAGCAGGCGCGTAAATTACCCAATCCTGACAC-AGGGAGGTAGTGACAATAAATAACAATGCCGGGCTTTTTCAAGTCTGGCAATTGGAATGAGAACAATTTAAATCCCTTAACGAGGATCAATTGAAGGGCAAGTCTGGTGCCAGCAGCCGCGGTAATTCCAGCTTCAATAGCGTATATCTAAGTTGTTGCAGTTAAAAAGCTCGTAGTTGGATATC--TGTGT-TGGATT---GTTGGTC--------TTGGGAAACTGA--GTAC----TG-AATAATTTG-GCATATA-TTTTGTGAGGCTTCTTT----CTGACATTAAGTTGT-TGGTTGGAAAGGCTTGCA--TCGTTTACTGTGAAAAAATTAGAGTGTTTCAAGCAGGCG-TT--TGCT----TTTAAATACATTAGCATGGAATAATAAGATATGACTTGTGTGGTCTATTTTGTTGGTTTGCACA-CGCAAGTAATGATTAATAGGGACAGTT-GGGGGTATTCATATTTCAG-TGTCAGAGGTGAAATTCTTGGATCGCTGAAAGATGAGCTTAGGCGAAAGCATTTACCATGGATGTTTTCATTAATCAAGAACGAAAGTTAGGGGATCGAAGATGATTAGATACCATCGTAGTCTTAACCATAAACTATGCCGACTCGGGATTGGCAGTCGTTGAA-------TAATGACCTTGTCAGCACCGTATGAGAAATCAAAGTCTTTGGGTTCC-GGGGAGAGTATGATCGCAAGGTTGAAATTTAAAGAAA--TTGACGGAAGGGCACCACCAGGAGTGGAGCCTGCGGCTTAATTTGACTCAACACGGG-------------------------------------------------------------------------------------------------------------------------------------------------------------------------------------------------------------------------------------------------------------------------------------------------------------------------------------------------------------------------------------------------------------------------------------------------------------------------------------------------------------------------------------------------------------------------------------------------------------------------------------------------------------
>SraSST-2017Apr26022740-Otu12
--------------------------------------------------------------------------------------------------------------------------------------------------------------------------------------------------------------------------------------------------------------------------------------------------------------------------------------------------------------------------------------------------------------------------------------------------------------------------------------------------------------------------------------------------------------------------------------------------------------------------------------------AGCTCCAATAGCGTATATTAAAGTTGTTGCAGTTAAAAAGCTCGTAGTTGGATTTG--CGTTTGTGAATGAATAGTGATCG----------TGAGATTGC--GGTT-------TATTTATCA-G-ACATT-ATTTGGGACTAGGGGTTTC--TTGGCATTGAGTTGT-TGA---GATTCAACTACCCATCGTTTACTGTGAAAAAATTAGAGTGTTTCAAGCAGGGG-TTAATCCT-----TTGAATATATTAGCATGGAATAATAAGATACGACTCGTATGGTCTATTTTGTTGGTTTGCACA-TATGAGTAATGATTAATAGGGACAGTT-GGGGGTATTCATATTTGAG-CGTCAGAGGTGAAATTCTTGGATCGCTGAAAGATGAGCTAAGGCGAAAGCATTTACCAAGGATGTT-----------------------------------------------------------------------------------------------------------------------------------------------------------------------------------------------------------------------------------------------------------------------------------------------------------------------------------------------------------------------------------------------------------------------------------------------------------------------------------------------------------------------------------------------------------------------------------------------------------------------------------------------------------------------------------------------------------------------------------------------------------------------------------------------------------------------------------------------------------------------------------------------------------------------
>14_236_concarneau_seq_GW
----------------------------------------------------------------------------------------------------------------------------------------------------------------------------------------------------------------------------------------------------------------------------------------------------------------------------------------------------------------------------------------------------------------------------------------------------------------------------------------------------------------------------------------------------------------------------------------------------------------------------------------------CTCC-ATAGCGTATATT-AAGTTGTTGCAGTTAAAAAGCTCGTAGTTGGATTTG--CGTTTGTGAATG---AATAGTGATC-------GTGAGATTGC--GGTT-------TATTTATCA-G-ACATT-ATTTGGGACTAGGGGTTTC--TTGGCATTGAGTTGT-TGA---GATTCAACTACCCATCGTTTACTGTGAAAAAATTAGAGTGTTTCAAGCAGGGG-TTAATCCT-----TTGAATATATTAGCATGGAATAATAAGATACGACTCGTATGGTCTATTTTGTTGGTTTGCACA-TATGAGTAATGATTAATAGGGACAGTT-GGGGGTATTCATATTTGAG-CGTCAGAGGTGAAATTCTTGGATCGCTGAAAAATGAGCTAAGGCGAAAGCATTTACCAAGGATGTTTTCATTAATCAAGAACGAAAGTTAGGGGATCGAAGATGATTAGATACCATCGTAGTCTTAACCGTAAACTATGCCGACTNNNNNNNNNNNNNNNNN------NNNNNNNNNNNNNNNNNNNNNNNNNNNNNNNNNNNNNNNNNNNNNNNNNNN-NNNNNGAGTATGGTCGCAAGATTGAAACTTAAAGGTAGTTTGACGGAAGGGCACT-CCAAATGTGGAACTTGCGGCTTAATTTGACTCAACACGGGGAAACTTACCAGGTCCAGACATAATAA-GGATTGACAGATTGAGAGCTCTTTCTTGA-TTTTATGGGTGGTGGTGCATGG-CCGTTCTTAGTTGGTG-GAGTGATTTGTCTGGTTTATTCCGTTAACGAACGAGACGTGTGTATG-----TAGTTT----TTGT-CC-TTGTCCTTGCGACGAGATGACATATCTACATAGACTATTAGTGACT--AACTAATTGAAGTGACACGCAATAACAGGTCTGTGATGCCCTTAGATGTTCTGGGCCGCACGCGCGTTACAATGAATCGTTCAACAGGT-TATTTCCTGAGTCGAAAGGCTTGGGTAATCCTTTAAATACGGTTCGTGTTAGGGATAGATTTTTGCAATTATTAATCTTGAACGAGGAATATTTAGTAAACGCAGGTCATCAGCCTGCATTGATTACGTCCCTGCCCTTTGTACACACCGCCCGTCGCACCAACCGATTGGATGTTTTGTTGAAATATGTGG----------ATGTTTGTTGTGTGGATTTGT-TTTTGCGCGA-TAGAT------AGAAACGTATTAAAACTGAATATCTAGAGGATGGTGAAGTCGTAAC---------------------------------------
>SraSST-2017Apr26022740-Otu19
--------------------------------------------------------------------------------------------------------------------------------------------------------------------------------------------------------------------------------------------------------------------------------------------------------------------------------------------------------------------------------------------------------------------------------------------------------------------------------------------------------------------------------------------------------------------------------------------------------------------------------------------AGCTCCAATAGCGTATATTAAAGTTGTTGCAGTTAAAAAGCTCGTAGTTGGATTTG--CGTTTATGGATGGGTTGCGGTCG----CGAGACTGGGACTCG--TTGC---ATG-----------G-ACATT-TTTTGGGAGCAGGGGTTTC--TTGGCATTGAGTTGT-TGA---GATTCAACTACCCATCGTTTACTGTGAAAAAATTAGAGTGTTTCAAGCAGGGG-TTAGTCCT-----TTGAATATATTAGCATGGAATAATAAGATACGACTCGTATGGTCTATTTTGTTGGTTTGCACA-TATGAGTAATGATTAATAGGGACAGTT-GGGGGTATTCATATTTGAG-CGTCAGAGGTGAAATTCTTGGATCGCTGAAAGATGAGCTAAGGCGAAAGCATTTACCAAGGATGTT-----------------------------------------------------------------------------------------------------------------------------------------------------------------------------------------------------------------------------------------------------------------------------------------------------------------------------------------------------------------------------------------------------------------------------------------------------------------------------------------------------------------------------------------------------------------------------------------------------------------------------------------------------------------------------------------------------------------------------------------------------------------------------------------------------------------------------------------------------------------------------------------------------------------------
>SraSST-2017Apr26022740-Otu35
--------------------------------------------------------------------------------------------------------------------------------------------------------------------------------------------------------------------------------------------------------------------------------------------------------------------------------------------------------------------------------------------------------------------------------------------------------------------------------------------------------------------------------------------------------------------------------------------------------------------------------------------AGCTCCAATAGCGTATATTAAAGTTGTTGCAGTTAAAAAGCTCGTAGTTGGATTTG--CGTTGATGGATG------GGT------------TGTGGTCGT--GAGA-TTACGACTCGTTCCATGAACATT-TTTTGGGAGCAGGGGTTCT--TTGGCATTGAGTTGT-TGA---AGTTCAACTACCCATCGTTTACTGTGAAAAAATTAGAGTGTTTCAAGCAGGGG-TTAGTCCT-----TTGAATATATTAGCATGGAATAATAAGATACGACTCGTATGGTCTATTTTGTTGGTTTGCACA-TATGAGTAATGATTAATAGGGACAGTT-GGGGGTATTCATATTTGAG-CGTCAGAGGTGAAATTCTTGGATCGCTGAAAGATGAGCTAAGGCGAAAGCATTTACCAAGGATGTT-----------------------------------------------------------------------------------------------------------------------------------------------------------------------------------------------------------------------------------------------------------------------------------------------------------------------------------------------------------------------------------------------------------------------------------------------------------------------------------------------------------------------------------------------------------------------------------------------------------------------------------------------------------------------------------------------------------------------------------------------------------------------------------------------------------------------------------------------------------------------------------------------------------------------
>SraSST-2017Apr26022740-Otu37
--------------------------------------------------------------------------------------------------------------------------------------------------------------------------------------------------------------------------------------------------------------------------------------------------------------------------------------------------------------------------------------------------------------------------------------------------------------------------------------------------------------------------------------------------------------------------------------------------------------------------------------------AGCTCCAATAGCGTATATTAAAGTTGTTGCAGTTAAAAAGCTCGTAGTTGGATTTG--CGTTGATGGACGAGTGTCGGTC------------GCGAGACT--GGGA--TTTGTAGCATT----A-ACATT-TTTTGGGAGCAGGGGTTTC--TTGGCATTGAGTTGT-TGA---GATTCAACTACCCATCGTTTACTGTGAAAAAATTAGAGTGTTTCAAGCAGGGCTTT--GGCC----TTTGAATATATTAGCATGGAATAATAAGATACGACTCGTATGGTCTATTTTGTTGGTTTGCACA-AATGAGTAATGATTAATAGGGACAGTT-GGGGGTATTCATATTTGAG-CGTCAGAGGTGAAATTCTTGGATCGCTGAAAGATGAGCTAAGGCGAAAGCATTTACCAAGGATGTT-----------------------------------------------------------------------------------------------------------------------------------------------------------------------------------------------------------------------------------------------------------------------------------------------------------------------------------------------------------------------------------------------------------------------------------------------------------------------------------------------------------------------------------------------------------------------------------------------------------------------------------------------------------------------------------------------------------------------------------------------------------------------------------------------------------------------------------------------------------------------------------------------------------------------
>SraSST-2017Apr26022740-Otu49
------------------------------------------------------------------------------------------------------------------------------------------------------------------------------------------------------------------------------------------------------------------------------------------------------------------------------------------------------------------------------------------------------------------------------------------------------------------------------------------------------------------------------------------------------------------------------------------------------------------------CCAGCAGCTGCGGTAATTCCAGCTCCAATAGCGTATATTAAAGTTGTTGCAGTTAAAAAGCTCGTAGTTGGATTTG--CGTTGATGAACG---TGCTGT---------------GATCGT--GAGA-TGATGGCGTGTTTGTTCAACATT-ATTTGGGAGCAGGGGTTTC--TTGGCATTAAGTTGT-TGA---GATTCAACTACCCATCGTTTACTGTGAAAAAATTAGAGTGTTTCAAGCAGGGG-TTTATCCT-----TTGAATATATTAGCATGGAATAATAAGATATGACTCGTATGGTCTATTTTGTTGGTTTGCACA-TATGAGTAATGATTAATAGGGACAGTT-GGGGGTATTCATATTTGAG-CGTCAGAGGTGAAATTCTTGGATCGCTGAAAGATGAGCTAAGGCGAAAGCATTTACCAAGGATGTTTTCATTAATCAAGAACGAAAGT-------------------------------------------------------------------------------------------------------------------------------------------------------------------------------------------------------------------------------------------------------------------------------------------------------------------------------------------------------------------------------------------------------------------------------------------------------------------------------------------------------------------------------------------------------------------------------------------------------------------------------------------------------------------------------------------------------------------------------------------------------------------------------------------------------------------------------------------------------------------------------------------------
>SraSST-2017Apr26022740-Otu24
--------------------------------------------------------------------------------------------------------------------------------------------------------------------------------------------------------------------------------------------------------------------------------------------------------------------------------------------------------------------------------------------------------------------------------------------------------------------------------------------------------------------------------------------------------------------------------------------------------------------------------------------AGCTCCAATAGCGTATATTAAAGTTGTTGCAGTTAAAAAGCTCGTAGTTGGATTGG--TGTTG-GTTATG---------------TTTCTCTGGGAA-----ATTCTCAAAGCGACGTT----AACCAAT-ATATTTGGGATTTGGTCTAGAATGGCATTCAGTTGT-TGATTTAGTTCCAGCCCA--TCGTTTACTGTGAAAAAATTAGAGTGTTTAAAGCAGG---TT--TTGTAACCGTTGAATACATTAGCATGGAATAATAATATATGACTCGTATGGTCTATTTTGTTGGTTTGCACG-AATGAGTAATGATTAATAGGGACAGTT-GGGGGTATTCATATTTGAG-CGTCAGAGGTGAAATTCTTGGATCGCTGAAAGATGAGCTAAGGCGAAAGCATTTACCAAGGATGTT-----------------------------------------------------------------------------------------------------------------------------------------------------------------------------------------------------------------------------------------------------------------------------------------------------------------------------------------------------------------------------------------------------------------------------------------------------------------------------------------------------------------------------------------------------------------------------------------------------------------------------------------------------------------------------------------------------------------------------------------------------------------------------------------------------------------------------------------------------------------------------------------------------------------------
>P.australis_parasite_SSU_Oban
----------------------------------------------------------------------------------------------------------------------------------TGCTTGACGATGTGTT-------------------------------TTATAAATACAT------------------------------TGGCATTTATTAGATTGAAACTAA--------TTTTAAA--------------GTTGAGTCATAATAACTGTGCGGATCG-------TT--TTGTAAAAAGCGATGAATCAATTGGGTTTCTGCCCTATCAGTTTTGGATGGCTGTGTATTGGACAGCCATGACATTAACGGGTAACGGGGAATTGGGGTTTGATACCGGAGAGGGCGCCTTAGAAATGGCGACCACATCCAAGGAAGGCAGCAGGCGCGTAAATTACCCAATCCTAATTCTAGGGAGGTAGTGACTAGAAATAACGATTC-GAGATGCTTTGCATTTTGAAATTGGAATGAGAACAATTTAAATCCCTTATCGAGGATCAATTGGAGGGCAAGTCTGGTGCCAGCAGCCGCGGTAATTCCAGCTCCAATAGCGTATATTAAAGTTGTTGCAGNNAAAAAGCTCGTAGTTGGATT----GGTGT-TGGTTA---TG----------TTTATTTGNGAA-----ATTCTCAAAGAGACGTTAA----CCAAT-ATATTTGGGATTTGGTCTAGAATGGCATTCAGTTGT-TGATTTAGTTCCAGCCCA--TCGTTTACTGTGAAAAAATTAGAGTGTTTAAAGCAGGTT-TTGTAACC----GTTGAATACATTAGCATGGAATAATAATATATGACTCGTATGGTCTATTTTGTTGGTTTGCACG-TATGAGTAATGATTAATAGGGACACTT-GGGGGTATTCATATTTGAG-CGTCAGAGGTGAAATTTTTGGATCGTTGAAAGATGAGATAAGGCGAAAGCATTTACCAAGGATGTTTTCATTAATCAAGAACGAAAGTTAGGGGATCGAAGATGATTAGATACCATTGTAGTCTTAACCATAAACTATGCCGACTCGGGATTG-----TGTT-TAGGGATTAAACCGAAC---GCAGCACCGTATGAGAAATCAAAGTCTTTGGGTTCC-GGGGGGAGTATAGTCACAAGGCT--------------------------------------------------------------------------------------------------------------------------------------------------------------------------------------------------------------------------------------------------------------------------------------------------------------------------------------------------------------------------------------------------------------------------------------------------------------------------------------------------------------------------------------------------------------------------------------------------------------------------------------------------------------------------------------------------------------------------------------
>Melosira_sp._parasite_SSU_Oban
---------------------------------------------------------------------------------------------------------------------------------------------------------------------------------------------------------------------------TTGCATTTATTAGATTGAAACTAA--------TTTTAAA--------------GTTGAGTCATAATAACTGTGCGGATCG-------TT--TTGTAAAAAGCGATGAATCAATTGGGTTTCTGCCCTATCAGTTTTGGATGGCTGTGTATTGGACAGCCATGACATTAACGGGTAACGGGGAATTGGGGTTTGATACCGGAGAGGGCGCCTTAGAAATGGCGACCACATCCAAGGAAGGCAGCAGGCGCGTAAATTACCCAATCCTAATTCTAGGGAGGTAGTGACTAGAAATAACGATTC-GAGATGCTTTGCATTTTGAAATTGGAATGAGAACAATTTAAATCCCTTATCGAGGATCAATTGGAGGGCAAGTCTGGTGCCAGCAGCCGCGGTAATTCCAGCTCCAATAGCGTATATTAAAGTTGTTGCAGTTAAAAAGCTCGTAGTTGGATT----GGTGT-TGGTTA---TG----------TTTCTCTGGGAA-----ATTCTCAAAGCGACGTTAA----CCAAT-ATATTTGGGATTTGGTCTAGAATGGCATTCAGTTGT-TGATTTAGTTCCAGCCCA--TCGTTTACTGTGAAAAAATTAGAGTGTTTAAAGCAGGTT-TTGTAACC----GTTGAATACATTAGCATGGAATAATAATATATGACTCGTATGGTCTATTTTGTTGGTTTGCACG-TATGAGTAATGATTAATAGGGACAGTT-GGGGGTATTCATATTTGAG-CGTCAGAGGTGAAATTCTTGGATCGCTGAAAGATGAGCTAAGGCGAAAGCATTTACCAAGGATGTTTTCATTAATCAAGAACGAAAGTTAGGGGATCGAAGATGATTAGATACCATCGTAGTCTTAACCATAAACTATGCCGACTCGGGATTG-----TGTT-TAGGGATTAAACCGAAC---GCAGCACCGTATGAGAAATCAAAGTCTTTGGGTTCC-GGGGGGAGTATAGTCACAAGGCTTAAACTTAAAGGAA--TTGACGGAAGGGC---------------------------------------------------------------------------------------------------------------------------------------------------------------------------------------------------------------------------------------------------------------------------------------------------------------------------------------------------------------------------------------------------------------------------------------------------------------------------------------------------------------------------------------------------------------------------------------------------------------------------------------------------------------------------------------------------------
>10-045_SSU_Parasite_de_P._australis_(Charente,_17_mars_2010)
----------------------TTCCTGCCAGTAGTCATATGCTTGTCTCAAAGATTAAGCCATGCACGTCTAAGTTTAAGCAA-TTTAAACAGTGAAACTGCGAATGGCTCATTATATCAGTTATAGCCTATTTGATAGTACCTTACTAGTTGGATATCCGTAGTAATTCTAGAGTTAATACATGCTT-GAAGAT----GTG---TTTTATAAATACATTGCATTTATTAGATTGAAACTAA--------TTTTAAA--------------GTTGAGTCATAATAACTGTGCGGATCG-------TT--TTGTAAAAAGCGATGAATCAATTGGGTTTCTGCCCTATCAGTTTTGGATGGCTGTGTATTGGACAGCCATGACATTAACGGGTAACGGGGAATTGGGGTTTGATACCGGAGAGGGCGCCTTAGAAATGGCGACCACATCCAAGGAAGGCAGCAGGCGCGTAAATTACCCAATCCTAATTCTAGGGAGGTAGTGACTAGAAATAACGATTC-GAGATGCTTTGCATTTTGAAATTGGAATGAGAACAATTTAAATCCCTTATCGAGGATCAATTGGAGGGCAAGTCTGGTGCCAGCAGCCGCGGTAATTCCAGCTCCAATAGCGTATATTAAAGTTGTTGCAGTTAAAAAGCTCGTAGTTGGATT----GGTGT-TGGTTA---TG----------TTTATTTGGGAA-----ATTCTCAAAGCGACGTTAA----CCAAT-ATATTTGGGATTTGGTCTAGAATGGCATTCAGTTGT-TGATTTAGTTCCAGCCCA--TCGTTTACTGTGAAAAAATTAGAGTGTTTAAAGCAGGTT-TTGTAACC----GTTGAATACATTAGCATGGAATAATAATATATGACTCGTATGGTCTATTTTGTTGGTTTGCACG-TATGAGTAATGATTAATAGGGACAGTT-GGGGGTATTCATATTTGAG-CGTCAGAGGTGAAATTCTTGGATCGCTGAAAGATGAGCTAAGGCGAAAGCATTTACCAAGGATGTTTTCATTAATCAAGAACGAAAGTTAGGGGATCGAAGATGATTAGATACCATCGTAGTCTTAACCATAAACTATGCCGACTCGGGATTG-----TGTT-TAGGGATTAAACCGAAC---GCAGCACCGTATGAGAAATCAAAGTCTTTGGGTTCC-GGGGGGAGTATAGTCACAAGGCTTAAACTTAAAGGAA--TTGACGGAAGGGCACCACCAGGAGTGGAGCCTGCGGCTTAATTTGACTCAACACGGGGAAACTTACCAGGTCCAGACATAGTAA-GGATTGACAGATTGAGAGCTCTTTCTTGA-TTCTATGGGTGGTGGTGCATGG-CCGTTCTTAGTTGGTG-GAGTGATTTGTCTGGTTAATTCCGTTAACGAACGAGAC----GTGTGTTGTTAGTTTG-TGTTTGC-TGTCTTTTGACAGTAATT-----CATATCTAACGAGACTATTAGTGACT--AACTAATTGAAGTTACACGCAATAACAGGTCTGTGATGCCCTTAGATGTTCTGGGCCGCACGCGCGCTACACTGATACGTTCAACAAGTATACAACCTTGATTGAAAAGTCTGGGTAATCTTTTGAATGCGTATCGTGATAGGGATAGATTTTTGCAATTATTAATCTTGAACGAGGAATTCCTAGTAAACGCAAGTCATCAGCTTGCATTGATTACGTCCCTGCCCTTTGTACACACCGCCCGTCGCACCAACCGATTGAATGGTTTGGTGAAATATTGGGATTCAACTTGGTGA--------------AGC-TTTATTGC--TTTGCTTGGTGAAGAACAGTATTAAACCAAACTATTTAGAGATTGGTGAAGTCGTAACAAGGTTTCCGTAGGTGAACCTGCCGAAGGATCA------
>10-044_SSU_Parasite_de_P._australis_(Charente,_17_mars_2010)
----------------------TTCCTGCCAGTAGTCATATGCTTGTCTCAAAGATTAAGCCATGCACGTCTAAGTTTAAGCAA-TTTAAACAGTGAAACTGCGAATGGCTCATTATATCAGTTATAGCCTATTTGATAGTACCTTACTAGTTGGATATCCGTAGTAATTCTAGAGTTAATACATGCTT-GAAGAT----GTG---TTTTATAAATACATTGCATTTATTAGATTGAAACTAA--------TTTTAAA--------------GTTGAGTCATAATAACTGTGCGGATCG-------TT--TTGTAAAAAGCGATGAATCAATTGGGTTTCTGCCCTATCAGTTTTGGATGGCTGTGTATTGGACAGCCATGACATTAACGGGTAACGGGGAATTGGGGTTTGATACCGGAGAGGGCGCCTTAGAAATGGCGACCACATCCAAGGAAGGCAGCAGGCGCGTAAATTACCCAATCCTAATTCTAGGGAGGTAGTGACTAGAAATAACGATTC-GAGATGCTTTGCATTTTGAAATTGGAATGAGAACAATTTAAATCCCTTATCGAGGATCAATTGGAGGGCAAGTCTGGTGCCAGCAGCCGCGGTAATTCCAGCTCCAATAGCGTATATTAAAGTTGTTGCAGTTAAAAAGCTCGTAGTTGGATT----GGTGT-TGGTTA---TGT---------TTATTTGGGAAATTC--TCAA---AGC-GACGTTAA----CCAAT-ATATTTGGGATTTGGTCTAGAATGGCATTCAGTTGT-TGATTTAGTTCCAGCCCA--TCGTTTACTGTGAAAAAATTAGAGTGTTTAAAGCAGGTT-TTGTAACC----GTTGAATACATTAGCATGGAATAATAATATATGACTCGTATGGTCTATTTTGTTGGTTTGCACG-TATGAGTAATGATTAATAGGGACAGTT-GGGGGTATTCATATTTGAG-CGTCAGAGGTGAAATTCTTGGATCGCTGAAAGATGAGCTAAGGCGAAAGCATTTACCAAGGATGTTTTCATTAATCAAGAACGAAAGTTAGGGGATCGAAGATGATTAGATACCATCGTAGTCTTAACCATAAACTATGCCGACTCGGGATTG-----TGTT-TAGGGATTAAACCGAAC---GCAGCACCGCATGAGAAATCAAAGTCTTTGGGATCC-GGGGGGAGTATAGTCACAAGGCTTAAACTTAAAGGAA--TTGACGGAAGGGCACCACCAGGAGTGGAGCCTGCGGCTTAATTTGACTCAACACGGGGAAACTTACCAGGTCCAGACATAGTAA-GGATTGACAGATTGAGAGCTCTTTCTTGA-TTCTATGGGTGGTGGTGCATGG-CCGTTCTTAGTTGGTG-GAGTGATTTGTCTGGTTAATTCCGTTAACGAACGAGAC----GTGTGTTGTTAGTTTG-TGTTTGC-TGTCTTTTGACAGTAATT-----CATATCTAACGAGACTATTAGTGACT--AACTAATTGAAGTTACACGCAATAACAGGTCTGTGATGCCCTTAGATGTTCTGGGCCGCACGCGCGCTACACTGATACGTTCAACAAGTATACAACCTTGATTGAAAAGTCTGGGTAATCTTTTGAATGCGTATCGTGATAGGGATAGATTTTTGCAATTATTAATCTTGAACGAGGAATTCCTAGTAAACGCAAGTCATCAGCTTGCATTGATTACGTCCCTGCCCTTTGTACACACCGCCCGTCGCACCAACCGATTGAATGGTTTGGTGAAATATTGGGATTCAACTTGGTGA--------------AGC-TTTATTGC--TTTGCTTGGTGAAGAACAGTATTAAACCAAACTATTTAGAGATTGGTGAAGTCGTAACAAGGTTTCCGTAGGTGAACCTGCCGAAGGATCAA-----
>SraSST-2017Apr26022740-Otu61
--------------------------------------------------------------------------------------------------------------------------------------------------------------------------------------------------------------------------------------------------------------------------------------------------------------------------------------------------------------------------------------------------------------------------------------------------------------------------------------------------------------------------------------------------------------------------------------------------------------------------------------------AGCTCCAATAGCGTATATTAAAGTTGTTGCAGTTAAAAAGCTCGTAGTTGGATT----GGTGT-TGGTTA---TACTTTACATTGTTTAAC------------TACTTTGTA-GATTTATTT-AACCAAT-ATATTTGGGATTTGGTCTAGAATGGCATTAAGTTGT-TGATTTAGTTCCAGCCCA--TCGTTTACTGTGAAAAAATTAGAGTGTTTAAAGCAGGTT-TTGTAACC----GTTGAATACATTAGCATGGAATAATAATATATGACTCGTATGGTCTATTTTGTTGGTTTGCACG-TATGAGTAATGATTAATAGGGACAGTT-GGGGGTATTCATATTTGAG-CGTCAGAGGTGAAATTCTTGGATCGCTGAAAGATGAACTAAGGCGAAAGCATTTACCAAGGATGTT-----------------------------------------------------------------------------------------------------------------------------------------------------------------------------------------------------------------------------------------------------------------------------------------------------------------------------------------------------------------------------------------------------------------------------------------------------------------------------------------------------------------------------------------------------------------------------------------------------------------------------------------------------------------------------------------------------------------------------------------------------------------------------------------------------------------------------------------------------------------------------------------------------------------------
>SraSST-2017Apr26022740-Otu31
--------------------------------------------------------------------------------------------------------------------------------------------------------------------------------------------------------------------------------------------------------------------------------------------------------------------------------------------------------------------------------------------------------------------------------------------------------------------------------------------------------------------------------------------------------------------------------------------------------------------------------------------AGCTCCAATAGCGTATATTAAAGTTGTTGCAGTTAAAAAGCTCGTAGTTGGATT----TGTTG-TGAGAG---------------TTTTGATGATGGACAAAGTCGATCGTC-TAAATTCCA----CATT-CTTTGTG---TTGGCTTTGGGATGGCATTCAGTTGC-TGCCTCAA-ATACACGCA--TCTTTTACTGTGAAAAAATTAGAGTGTTTAAAGCAGACG-TTATTGTC----GTTGAATACATTAGCATGGAATAATAATATATGACTCGATTGGTCTATTTTGTTGGTTTGCACA-TTTAAGTAATGATTAATAGGGACAGTT-GGGGATATTCATATTTGAG-CGTCAGAGGTGAAATTCTTGGATCGCTGAAAGATGAGCTAAGGCGAAAGCATTTATCAAGGATGTT-----------------------------------------------------------------------------------------------------------------------------------------------------------------------------------------------------------------------------------------------------------------------------------------------------------------------------------------------------------------------------------------------------------------------------------------------------------------------------------------------------------------------------------------------------------------------------------------------------------------------------------------------------------------------------------------------------------------------------------------------------------------------------------------------------------------------------------------------------------------------------------------------------------------------
>SraSST-2017Apr26022740-Otu44
--------------------------------------------------------------------------------------------------------------------------------------------------------------------------------------------------------------------------------------------------------------------------------------------------------------------------------------------------------------------------------------------------------------------------------------------------------------------------------------------------------------------------------------------------------------------------------------------------------------------------------------------AGCTCCAATAGCGTATATTAA---------------------CGTAGTTGGATT----TGTTG-TGAGAA---TTGAAATGGT--------TGACAAAGT--CGAT-------CGTTTTCAT-T-CCACA-TTCTTTGTGTTGGCTTTGGG-ATGGCATTCAGTTGC-TGCCTCAA-ATACACGCA--TCTTTTACTGTGAAAAAATTAGAGTGTTTAAAGCAGACG-TTATTGTC----GTTGAATACATTAGCATGGAATAATAATATATGACTCGATTGGTCTATTTTGTTGGTTTGCACA-TTTGAGTAATGATTAATAGGGACAGAT-GGGGATATTCATATTTGAG-CGTCAGAGGTGAAATTCTTGGATCGCTGAAAGATGAGCTAAGGCGAAAGCATTTATCAAGGATGTT-----------------------------------------------------------------------------------------------------------------------------------------------------------------------------------------------------------------------------------------------------------------------------------------------------------------------------------------------------------------------------------------------------------------------------------------------------------------------------------------------------------------------------------------------------------------------------------------------------------------------------------------------------------------------------------------------------------------------------------------------------------------------------------------------------------------------------------------------------------------------------------------------------------------------
>SraSST-2017Apr26022740-Otu2
--------------------------------------------------------------------------------------------------------------------------------------------------------------------------------------------------------------------------------------------------------------------------------------------------------------------------------------------------------------------------------------------------------------------------------------------------------------------------------------------------------------------------------------------------------------------------------------------------------------------------------------------AGCTCCAATAGCGTATATTAAAGTTGTTGCAGTTAAAAAGCTCGTAGTTGGATT----TGTTG-TGAGAG---TGAAG-------TGACTGGCACAATGT--CAGTCTTTTT-CATTCC------ACATT-CTTTGTG---TTGGCTTTGGGATGGCATTCAGTTGC-TGCCTCAA-ATACACGCA--TCTTTTACTGTGAAAAAATTAGAGTGTTTAAAGCAGACG-TTATTGTC----GTTGAATACATTAGCATGGAATAATAATATATGACTCGATTGGTCTATTTTGTTGGTTTGCACA-TATGAGTAATGATTAATAGGGACAGTT-GGGGATATTCATATTTGAG-CGTCAGAGGTGAAATTCTTGGATCGCTGAAAGATGAGCTAAGGCGAAAGCATTTATCAAGGATGTT-----------------------------------------------------------------------------------------------------------------------------------------------------------------------------------------------------------------------------------------------------------------------------------------------------------------------------------------------------------------------------------------------------------------------------------------------------------------------------------------------------------------------------------------------------------------------------------------------------------------------------------------------------------------------------------------------------------------------------------------------------------------------------------------------------------------------------------------------------------------------------------------------------------------------
>SraSST-2017Apr26022740-Otu29
--------------------------------------------------------------------------------------------------------------------------------------------------------------------------------------------------------------------------------------------------------------------------------------------------------------------------------------------------------------------------------------------------------------------------------------------------------------------------------------------------------------------------------------------------------------------------------------------------------------------------------------------AGCTCCAATAGCGTATATTAAAGTTGTTGCAGTTAAAAAGCTCGTAGTTGGATT----TGTTG-TGAGAG---TTGA--------TATGATGAACAAAGT--TTAT-------TGTATTTGA-TTCCACA-TTCTTTGTGTTGGATTTGGG-ATGGCATTGAGTTGC-TGCCTCAA-AGACACGCA--TCTTTTACTGTGAAAAAATTAGAGTGTTTAAAGCAGACG-TTATTGTC----GTTGAATACATTAGCATGGAATAATAATATATGACTCGATTGGTCTATTTTGTTGGTTTGCACA-TATGAGTAATGATTAATAGGGACAGTT-GGGGATATTCATATTTGAG-CGTCAGAGGTGAAATTCTTGGATCGCTGAAAGATGAGCTAAGGCGAAAGCATTTATCAAGGATGTT-----------------------------------------------------------------------------------------------------------------------------------------------------------------------------------------------------------------------------------------------------------------------------------------------------------------------------------------------------------------------------------------------------------------------------------------------------------------------------------------------------------------------------------------------------------------------------------------------------------------------------------------------------------------------------------------------------------------------------------------------------------------------------------------------------------------------------------------------------------------------------------------------------------------------
>13-374_20140918_SSU_Parasite_de_P._fraudulenta_(Lanv�oc,_09_septembre_2013)
----------------------TTCCTGCCAGTAGTCATATGCTTGTCTCAAAGATTAAGCCATGCATGTCTAAGTTTAAGCAA--TTAAACCGCGAAACTGCGAATGGCTCATTATATCAGTTATAGCCTACTTGATAGTACCTTACTACTTGGATAACCGTAGTAATTCTAGAGCTAATACATGCAT-AAATACCTGACCG---TT---TGGAAGGGTAGCATTTATTAGATTGAAACCAATGTTA-------------------ATTGAGTTGAGTCATAGTAACTGTGCGGATCGTA----TTT--TCGGAT---GCGATGAATCAATTGGGTTTCTGCCCTATCAGCTTTGGATGGCTGTGTATTGGACAGCCATGGCATTAACGGGTAACGGGGAATTAGGGTTTTATTCCGGAGAGGGAGCCTGAGAGACGGCTACCACATCCAAGGAAGGCAGCAGGCGCGTAAATTACCCAATCCTGACAC-AGGGAGGTAGTGACAATAAATAACAATCCTGGGCTATTTCTAGTCTAGGAATTGGAATGAGAACAATTTAAATCCCTTATCGAGGATCAATTGGAGGGCAAGTCTGGTGCCAGCAGCCGCGGTAATTCCAGCTCCAATAGCGTATATTAAAGTTGTTGCAGTTAAAAAGCTCGTAGTTGGATT----TGTTG-TGAGAG---TTGA--------TATGATGAACAAAGT--TTAT-------TGTATTTGA-TTCCACA-TTCTTTGTGTTGGATTTGGG-ATGGCATTGAGTTGC-TG-CCTCAAAGACACGCA--TCTTTTACTGTGAAAAAATTAGAGTGTTTAAAGCAGACG-TTATTGTC----GTTGAATACATTAGCATGGAATAATAATATATGACTCGATTGGTCTATTTTGTTGGTTTGCACA-TTTGAGTAATGATTAATAGGGACAGTT-GGGGATATTCATATTTGAG-CGTCAGAGGTGAAATTCTTGGATCGCTGAAAGATGAGCTAAGGCGAAAGCATTTATCAAGGATGTTTTCATTAATCAAGAACGAAAGTTAGGGGATCGAAGATGATTAGATACCATCGTAGTCTTAACCATAAACTATGCCGACTCGGGATTGGCCGTTGTTGT----TTTT---TGACATGGTCAGCACCGTATGAGAAATCAAAGTCTTTGGGTTCC-GGGGGGAGTATGGTCGCAAGGCTTAAACTTAAAGGAA--TTGACGGAAGGGCACCACCAGGAGTGGAGCCTGCGGCTTAATTTGACTCAACACGGGGAAACTTACCAGGTCCAGACATAGTAA-GGATTGACAGATTGAGAGCTCTTTCTTGA-TTCTATGGGTGGTGGTGCATGG-CCGTTCTTAGTTGGTG-GAGTGATTTGTCTGGTTAATTCCGTTAACGAACGAGACCTCTGTGTGTTGGTT-GTGCGTAATCGC-AA-TTTGCGGTTGCTCGC--------TCCTAAACAGACTTTTAGTGACT--AACTAAAGGAAGCTAGAGGCAATAACAGGTCTGTGATGCCCTTAGATGTTCTGGGCCGCACGCGCGCTACACTGATGCGTTCAACGAGTTTACAACCTTGATTGATAGGTCTGGGTAATCTTTTGAATGCGCATCGTGATAGGGATAGATTATTGCAATTATTAATCTTGAACGAGGAATTCCTAGTAAACGCAAGTCATCAGCTTGCATTGATTACGTCCCTGCCCTTTGTACACACCGCCCGTCGCACCGACCGATTGAATGGTTTGGTGAAACATTGGGATG-------TTGT-------TGTAGTGGGT-TTTATTATCTATTACT-CTTACAGAACTGTGTTAAACCACGCCATTTAGAGATCGGTGCAGTCGTAACAAGGTTTCCGTAGGTGAACCTGCCGAAGGATCAA-----
>SraSST-2017Apr26022740-Otu4
--------------------------------------------------------------------------------------------------------------------------------------------------------------------------------------------------------------------------------------------------------------------------------------------------------------------------------------------------------------------------------------------------------------------------------------------------------------------------------------------------------------------------------------------------------------------------------------------------------------------------------------------AGCTCCAATAGCGTATATTAAAGTTGTTGCAGTTAAAAAGCTCGTAGTTGGATTTC--TGTTT-TGAATG---TCCGGTCGG---TCAGTTTCTGA-TGT--GTAC--TTTG-GATATTTGA-G-GCATT-TTTTGTGAGGGTCTTTTA---CTGGCATTAAGTTGT-TGGTTTTAGAAGCTTGCA--TCGTTTACTGTGAAAAAATTAGAGTGTTTCAAGCAGGCG-TT--TGCT----TTTGAATACATTAGCATGGAATAATAAGATACGACTAGCGTGGTCTATTTTGTTGGTTTGAACA-CGCAAGTAATGATTAATAGGGACAGTT-GGGGGTATTCATATTTGAG-CGTCAGAGGTGAAATTCTTGGATCGCTGAAAGATGAGCTTAGGCGAAAGCATTTATCATGGATGTT-----------------------------------------------------------------------------------------------------------------------------------------------------------------------------------------------------------------------------------------------------------------------------------------------------------------------------------------------------------------------------------------------------------------------------------------------------------------------------------------------------------------------------------------------------------------------------------------------------------------------------------------------------------------------------------------------------------------------------------------------------------------------------------------------------------------------------------------------------------------------------------------------------------------------
>SraSST-2017Apr26022740-Otu22
--------------------------------------------------------------------------------------------------------------------------------------------------------------------------------------------------------------------------------------------------------------------------------------------------------------------------------------------------------------------------------------------------------------------------------------------------------------------------------------------------------------------------------------------------------------------------------------------------------------------------------------------AGCTCCAATAGCGTATATTAAAGTTGTTGCAGTTAAAAAGCTCGTAGTTGGATTTC--TGTGT-TTGATG---TCCGGTCGGTCATTTATTTG---ATGT--GTAC--TTTG-GATATTGGA-T-GCATT-TATTGTGAGGGTTCATTA---CTGGCATTAATTTGT-TGGTTTTGAAAGCTTGCA--TCGTTTACTGTGAAAAAATTAGAGTGTTTCAAGCAGGCG-TT--TGCT----TTTGAATACATTAGCATGGAATAATAAGATATGACTAGCGTGGTCTATTTTGTTGGTTTACACA-CGCAAGTAATGATTAATAGGGACAGTT-GGGGGTATTCATATTTGAG-CGTCAGAGGTGAAATTCTTGGATCGCTGAAAGATGAGCTTAGGCGAAAGCATTTATCATGGATGTT-----------------------------------------------------------------------------------------------------------------------------------------------------------------------------------------------------------------------------------------------------------------------------------------------------------------------------------------------------------------------------------------------------------------------------------------------------------------------------------------------------------------------------------------------------------------------------------------------------------------------------------------------------------------------------------------------------------------------------------------------------------------------------------------------------------------------------------------------------------------------------------------------------------------------
>SraSST-2017Apr26022740-Otu43
--------------------------------------------------------------------------------------------------------------------------------------------------------------------------------------------------------------------------------------------------------------------------------------------------------------------------------------------------------------------------------------------------------------------------------------------------------------------------------------------------------------------------------------------------------------------------------------------------------------------------------------------AGCTCCAATAGCGTATATTAAAGTTGTTGCAGTTAAAAAGCTCGTAGTTGGATTTC--TGTTT-TGAATG---TCCGGTCGG---TCGCTTCGCGA-TGT--GTAC----TAGGATATTTGA-G-GCATC-TTTTGTGAGGGTCCTTGA---CTGGCATTAAGTTGT-TGGTTTTGGAAGCTTGCA--TCGTTTACTGTGAAAAAATTAGAGTGTTTCAAGCAGGCG-TT--TGCT----TTTGAATACATTAGCATGGAATAATAAGATATGACTAGCGTGGTCTATTTTGTTGGTTTGCACA-CGCAAGTAATGATTAATAGGGACAGTT-GGGGGTATTCATATTTGAG-CGTCAGAGGTGAAATTCTTGGATCGCTGAAAGATGAGCTTAGGCGAAAGCATTTATCATGGATGTT-----------------------------------------------------------------------------------------------------------------------------------------------------------------------------------------------------------------------------------------------------------------------------------------------------------------------------------------------------------------------------------------------------------------------------------------------------------------------------------------------------------------------------------------------------------------------------------------------------------------------------------------------------------------------------------------------------------------------------------------------------------------------------------------------------------------------------------------------------------------------------------------------------------------------
>12-150_20140918_SSU_Parasite_du_complexe_"pseudodelicatissima"_(Ouessant,_17_juillet_2012)_
--------------------------------TAGTCATATGCTCGTCTCAAAGATTAAGCCATGCATGTCTAAGTATAAGCAATT-TATACGGTGAAACTGCGAATGGCTCATTATATCAGTTTTAGCCTACTTGATATTA-CTTACTACTTGGATAACCGTAGTAATTCTAGAGCTAATACATGCTT-AAAAACCCAACTT---CT----GGACGGGTTGCATTTATTAGATTGAAACCAATCTAGCTTTG--------GCTGGTATTGTGTTGAGTCATAATAACTAATCGGATCGCA------T--TCGT-----GCGATGAATCAATTGGGATTCTGCCCTATCAGCTTTGGATGGTAGGATATGGGCCTACCATGGCATTAACGGGTAACGGGGAATTAGGGTTTGATTCCGGAGAGGGAGCCTGAGAAACGGCTACCACATCCAAGGAAGGCAGCAGGCGCGTAAATTACCCAATCCTGACAC-AGGGAGGTAGTGACAATAAATAACAATGCCGGGCTTTTTCAAGTCTGGCAATTGGAATGAGAACAATTTAAATCCCTTAACGAGGATCAATTGGAGGGCAAGTCTGGTGCCAGCAGCCGCGGTAATTCCAGCTCCAATAGCGTATATTAAAGTTGTTGCAGTTAAAAAGCTCGTAGTTGGATTTC--TGTTT-TGAATG---TCCGGTCGG---TCAGTTTCTGA-TGT--GTAC--TTTG-GATATTTGA-G-GCATT-TTTTGTGAGGGTCTATTA---CTGGCATTAATTTAT-TGGTTTTAGAAGCTTGCA--TCGTTTACTGTGAAAAAATTAGAGTGTTTCAAGCAGGCG-TT--AGCT----TTTGAATACATTAGCATGGAATAATAAGATACGACTAGCGTGGTCTATTTTGTTGGTTTGCACA-CGCAAGTAATGATTAATAGGGACAGTT-GGGGGTATTCATATTTGAG-CGTCAGAGGTGAAATTCTTGGATCGCTGAAAGATGAGCTTAGGCGAAAGCATTTATCATGGATGTTTTCATTAATCAAGAACGAAAGTTAGGGGATCGAAGATGATTAGATACCATCGTAGTCTTAACCATAAACTATGCCGACTCGGGATTGGCAGTCGTT--------ATTAATGACTTTGTCAGCACCGTATGAGAAATCAAAGTCTTTGGGTTCC-GGGGGTAGTATGATCGCAAGGTTGAAACTTAAAGGAA--TTGACGGAAGGGCACCACCAGGAGTGGAGCCTGCGGCTTAATTTGACTCAACACGGGAAAACTTACCAGGTCCAGACATAGTAA-GGATTGACAGATTGAGAGCTCTTTCTTGA-TTCTATGGGTGGTGGTGCATGG-CCGTTCTTAGTTGGTG-GAGTGATTTGTCTGGTTAATTCCGTTAACGAACGAGACCTCCTCCTGCTAAATAGTTTGTGCTAAG-TATTACTTAGTAT-------TGAACTTCTTAGAGGGACTTTTGGCGATT--AGTCAAAGGAAGTTGGAGGCAATAACAGGTCTGTGATGCCCTTAGATGTTCTGGGCCGCACGCGCGCTACACTGATGCGTTCAACGAGTTTACAACCTTGACTGATAGGTCTGGGTAATCTTTTGAATGCGCATCGTGCTAGGGATAGATTATTGCAATTATTAATCTTGAACGAGGAATTCCTAGTAAACGCAAGTCATCAGCTTGCATTGATTACGTCCCTGCCCTTTGTACACACCGCCCGTCGCACCAACCGATTGAATGGTTCGGTGAAGAATCTGGACA-------CATG-------ATAAGGATGA-TTCAGTTCGTCTTTATTGAGT-GGAAGTTTTCTAAACCTAACTCTTTAGAGGATGGTGAAGTCGTAACAAGGTTTCCGTAGGTGAACCTGC----------------
>SraSST-2017Apr26022740-Otu66
------------------------------------------------------------------------------------------------------------------------------------------------------------------------------------------------------------------------------------------------------------------------------------------------------------------------------------------------------------------------------------------------------------------------------------------------------------------------------------------------------------------------------------------------------------------------------------------------------------------------CCAGCACCCGCGGTAATTCCAGCTCCAATAGCGTATATTAAAGTTGTTGCAGTTAAAAAGCTCGTAGTTGGATTTC--TGTTT-TGAATG---TCCGGTCGG---TCAGTTTCTGA-TGT--GTAC--TTTG-GATATTTGA-G-GCATT-TTTTGTGAGGGTCTATTA---CTGGCATTAATTTAT-TGGTTTTAGAAGCTTGCA--TCGTTTACTGTGAAAAAATTAGAGTGTTTCAAGCAGGCA-CA--CGCC-----TTGAATACATTAGCATGGAATAATAAGATAGGACCTCGGT--TCTATTTTGTTGGTTTCTAGAGCTGAGGTAATGATTAATAGGGATAGTT-GGGGGCATTCGTATTTAAC-TGTCAGAGGTGAAATTCTTGGATTTGTTAAAGACGGACTACTGCGAAAGCATTTGCCAAGGATGTTTTCATTGATCAAGAACGAAAGT-------------------------------------------------------------------------------------------------------------------------------------------------------------------------------------------------------------------------------------------------------------------------------------------------------------------------------------------------------------------------------------------------------------------------------------------------------------------------------------------------------------------------------------------------------------------------------------------------------------------------------------------------------------------------------------------------------------------------------------------------------------------------------------------------------------------------------------------------------------------------------------------------
>AB287418_O._porphyrae
--------------------------------TAGTCATACGCTCGTCTCAAAGATTAAGCCATGCATGTCTAAGTATAAATAATTTT-TACTGTGAAACTGCGAATGGCTCATTATATCAGTTATAGTCTATTTGATAGTACCTTACTACTTGGATAACCGTAGTAATTCTAGAGCTAATACATGCTA-AAAAACCCAACTG---CTTGTCGGACGGGTTGCATTTATTAGATTGAAACCAATCTGG---CACTTGT---GTCGGTATTGAGTTGAGTCATAATAACTGTGCGGATCGTA----TTT--CTAT-----GCGATGAATCAATTGAGTTTCTGCCCTATCAGCTTTGGATGGTAGGATATGGGCCTACCATGGCATTAACGGGTAACGGGGAATTAGGGTTTGATTCCGGAGAGGGGGCCTGAGAAACGGCCACCACATCCAAGGAAGGCAGCAGGCGCGTAAATTACCCAATTCTGACAC-AGAGAGGTAGTGACAATAAATAACAATGCCGGGCTTTTTTAAGTCTGGCAATTGGAATGAGAACAATTTAAATCCCTTAACGAGGATCAATTGGAGGGCAAGTCTGGTGCCAGCAGCCGCGGTAATTCCAGCTCCAATAGCGTATATTAAAGTTGTTGCAGTTAAAAAGCTCGTAGTTGGATTTC--TGTCT-TGAATT---TCCGGTCCGTA-TATTTATTTATATGT--GTAC---TTG-GAATTTCGA-T-TCATT-TTTTGTGAGACTGTTGTA---CTGACATTAAGTTGT-TGGCATAATGGGCTTGCA--TCGTTTACTGTGAAAAAATTAGAGTGTTTAAAGCAGGCGTTT--CGCT----GTTGAATACATTAGCATGGAATAATAAAATATGACTTTGGTGGTCTATTTTGTTGGTTTGCACA-CCAGAGTAATGATTAATAGGGACAGTT-GGGGGTATTCATATTTCAG-CGTCAGAGGTGAAATTCTTGGATCGCTGAAAGATGAGCTTAGGCGAAAGCATTTATCATGGATGTTTTCATTAATCAAGAACGAAAGTTAGGGGATCGAAGATGATTAGATACCATCGTAGTCTTAACCATAAACTATGCCGACTCGGGATTGGCAGTCGTT------GATTTAATGACCTTGTCAGCACCGTATGAGAAATCAAAGTCTTTGGGTTCC-GGGGGGAGTATGGTCGCAAGGCTGAAACTTAAAGGAA--TTGACGGAAGGGCACCACCAGGAGTGGAGCCTGCGGCTTAATTTGACTCAACACGGGAAAACTTACCAGGTCCGGACATAGTAA-GGATTGACAGATTGAGAGCTCTTTCTTGA-TTCTATGGGTGGTGGTGCATGG-CCGTTCTTAGTTGGTG-GAGTGATTTGTCTGGTTAATTCCGTTAACGAACGAGACCTCCGCCTGCTAAATAGTTT-TGCATAC-AA--TTTTTGTATGTT----AAGACTTCTTAGAGGGACTTTTGGCGATT--AGCCAAAGGAAGTTGGAGGCAATAACAGGTCTGTGATGCCCTTAGATGTTCTGGGCCGCACGCGCGCTACACTGATGCGTTCAACGAGTTTACAACCTTGACTGATAGGTCTGGGTAATCTTTTGAATGCGCATCGTGCTAGGGATAGATTATTGCAATTATTAATCTTGAACGAGGAATTCCTAGTAAACGCAAGTCATCAGCTTGCATTGATTACGTCCCTGCCCTTTGTACACACCGCCCGTCGCACCAACTGATTGAATGGTTCGGTGAAAAATTGGGACC-------ACGA-------GTCTTTTTGC-TTCATTGCGAATTGATTTGAG-GGAACTTTTTTAAATCACACTATTTAGAAGATGGTGAAGTCGTAACAAGGTTTCCGTAGGTGAACCTGCGGAAGGATCATTA---
>Olpidiopsis_porphyrae_var._scotiae
---------------------------------------------------------------TGCATGTCTAAGTATAAATAATTTT-TACTGTGAAACTGCGAATGGCTCATTATATCAGTTATAGTCTATTTGATAGTACCTTACTACTTGGATAACCGTAGTAATTCTAGAGCTAATACATGCTA-AAAAACCCAACTG---CTTGTCGGACGGGTTGCATTTATTAGATTGAAACCAATCTGG---CACTTGT---GTCGGTATTGAGTTGAGTCATAATAACTGTGCGGATCGTA----TTT--CTAT-----GCGATGAATCAATTGAGTTTCTGCCCTATCAGCTTTGGATGGTAGGATATGGGCCTACCATGGCATTAACGGGTAACGGGGAATTAGGGTTTGATTCCGGAGAGGGGGCCTGAGAAACGGCCACCACATCCAAGGAAGGCAGCAGGCGCGTAAATTACCCAATTCTGACAC-AGAGAGGTAGTGACAATAAATAACAATGCCGGGCTTTTTTAAGTCTGGCAATTGGAATGAGAACAATTTAAATCCCTTAACGAGGATCAATTGGAGGGCAAGTCTGGTGCCAGCAGCCGCGGTAATTCCAGCTCCAATAGCGTATATTAAAGTTGTTGCAGTTAAAAAGCTCGTAGTTGGATTTC--TGTCT-TGAATT---TCCGGTCCGTA-TATTTATTTATATGT--GTAC---TTG-GAATTTCGA-T-TCATT-TTTTGTGAGACTGTTGTA---CTGACATTAAGTTGT-TGGCATAATGGGCTTGCA--TCGTTTACTGTGAAAAAATTAGAGTGTTTAAAGCAGGCGTTT--CGCT----GTTGAATACATTAGCATGGAATAATAAAATATGACTTTGGTGGTCTATTTTGTTGGTTTGCACA-CCAGAGTAATGATTAATAGGGACAGTT-GGGGGTATTCATATTTCAG-CGTCAGAGGTGAAATTCTTGGATCGCTGAAAGATGAGCTTAGGCGAAAGCATTTATCATGGATGTTTTCATTAATCAAGAACGAAAGTTAGGGGATCGAAGATGATTAGATACCATCGTAGTCTTAACCATAAACTATGCCGACTCGGGATTGGCAGTCGTT------GATTTAATGACCTTGTCAGCACCGTATGAGAAATCAAAGTCTTTGGGTTCC-GGGGGGAGTATGGTCGCAAGGCTGAAACTTAAAGGAA--TTGACGGAAGGGCACCACCAGGAGTGGAGCCTGCGGCTTAATTTGACTCAACACGGGAAAACTTACCAGGTCCGGACATAGTAA-GGATTGACAGATTGAGAGCTCTTTCTTGA-TTCTATGGGTGGTGGTGCATGG-CCGTTCTTAGTTGGTG-GAGTGATTTGTCTGGTTAATTCCGTTAACGAACGAGACCTCCGCCTGCTAAATAGTTT-TGCATAC-AA--TTTTTGTATGTT----AAGACTTCTTAGAGGGACTTTTGGCGATT--AGCCAAAGGAAGTTGGAGGCAATAACAGGTCTGTGATGCCCTTAGATGTTCTGGGCCGCACGCGCGCTACACTGATGCGTTCAACGAGTTTACAACCTTGACTGATAGGTCTGGGTAATCTTTTGAATGCGCATCGTGCTAGGGATAGATTATTGCAATTATTAATCTTGAACGAGGAATTCCTAGTAAACGCAAGTCATCAGCTTGCATTGATTACGTCCCTGCCCTTTGTACACACCGCCCGTCGCACCAACTGATTGAATGGTTCGGTGAAAAATTGGGACC-------ACGA-------GTCTTTTTGC-TTCATTGCGAATTGATTTGAG-GGAACTTTTTTAAATCACACTATTTAGAAGATGGTGAAGTCGTAACAAGGTTTCCGTAGGTGAACCTGCGGAAGGATCATTACCA
>O.palmariae
------------------------------------------------------------------------------------------------------------------------------------------------------------TAACCGTAGTAATTCTAGAGCTAATACCTGCTA-CAAAACCCAACTG---CTTGTCGGACGGGTTGCATTTATTAGATTGAAACCAATCTGG---CACTTGT---GCTGGTATTGAGTTGAGTCATAATAACTGTGCGGATCGTA----TTT--CTAT-----GCGATGAATCAATTGAGTTTCTGCCCTATCAGCTTTGGATGGTAGGATATGGGCCTACCATGGCATTAACGGGTAACGGGGAATTAGGGTTTGATTCCGGAGAGGGAGCCTGAGAAACGGCTACCACATCCAAGGAAGGCAGCAGGCGCGTAAATTACCCAATTCTGACAC-AGAGAGGTAGTGACAATAAATAACAATGCCGGGCTTTTTTAAGTCTGGCAATTGGAATGAGAACAATTTAAATCCCTTAACGAGGATCAATTGGAGGGCAAGTCTGGTGCCAGCAGCCGCGGTAATTCCAGCTCCAATAGCGTATATTAAAGTTGTTGCAGTTAAAAAGCTCGTAGTTGGATTTC--TGTTT-TGAATT---TCCGGTCCGTA-TATTAATTTATATGT--GCAC---TTG-GAATTTCGA-T-TCATT-TTTTGTGAGACTGTTGTA---CTGACATTCAGTTGT-TGGCATAATGGGCTTGCA--TCGTTTACTGTGAAAAAATTAGAGTGTTTAAAGCAGGCGTTT--CGCT----GTTGAATACATTAGCATGGAATAATAAAATATGACCTTGGTGGTCTATTTTGTTGGTTTGCACA-CCAGGGTAATGATTAATAGGGACAGTT-GGGGGTATTCATATTTCAG-CGTCAGAGGTGAAATTCTTGGATCGCTGAAAGATGAGCTTAGGCGAAAGCATTTATCATGGATGTTTTCATTAATCAAGAACGAAAGTTAGGGGATCGAAGATGATTAGATACCATCGTAGTCTTAACCATAAACTATGCCGACTCGGGATTGGCAGTCGTT------GATTTAATGACTCTGTCAGCACCGTATGAGAAATCAAAGTCTTTGGGTTCC-GGGGGGAGTATGGTCGCAAGGCTGAAACTTAAAGGAA--TTGACGGAAGGGCACCACCAGGAGT---------------------------------------------------------------------------------------------------------------------------------------------------------------------------------------------------------------------------------------------------------------------------------------------------------------------------------------------------------------------------------------------------------------------------------------------------------------------------------------------------------------------------------------------------------------------------------------------------------------------------------------------------------------------------------------------
>KP098365
----------------------------------------------------------------------------------------------------------------------------------------------CCTTACTACTTGGATAACCGTAGTAATTCTAGAGCTAATACATGCGT-AAATACCCAACTG---CTTGTCGGACGGGTAGCATTTATTAGATTGAAACCAATGCGA----CTTCGG----TCGGTGTTGTGTTGAGTCATAATAACTGTGCGGATCG------CTT--CACA-----GCGATAGATCCATTGAGTTTCTGCCCTATCAGCTTTGGATGGTAGGATATGGGCCTACCATGGCGTTAACGGGTAACGGGGAATTAGGGTTTGATTCCGGAGAGGGAGCCTTAGAAACGGCTACCACATCCAAGGAAGGCAGCAGGCGCGTAAATTACCCAATCCTGACAC-AGGGAGGTAGTGACAATAAATAACAATG-TCGGGCTTTTCAAGTCTGACAATTGGAATGAGAACAATTTAAATCCCTTAACGAGGATCAATTGGAGGGCAAGTCTGGTGCCAGCAGCCGCGGTAATTCCAGCTCCAATAGCGTATATTAAAGTTGTTGCAGTTAAAAAGCTCGTAGTTGGATTTC--TGGTT-TGAGCG---TCCGGTCGAGCTTGTCTCT----------GTAC--TATG-GATGTTTGG-G-CCATT-TTTTGTGAGGGGGCTTTT---CTGCCATTGAGTTGG-TGGTTGAGTCGACTTGCA--TCGTTTACTGTGAAAAAATTAGAGTGTTTAAAGCAGGCG-TT--TGCT--CATTTGAATACATTAGCATGGAATAATAAGATACGACCTTGGTGGTCTATTTTGTTGGTTTGCACA-CCGAGGTAATGATTAATAGGGACAGTT-GGGGGTATTCATATTTCAA-CGTCAGAGGTGAAATTCTTGGATCGTTGAAAGATGAGCTTAGGCGAAAGCATTTACCAAGGATGTTTTCATTAATCAAGAACGAAAGTTAGGGGATCGAAGATGATTAGATACCATCGTAGTCTTAACCATAAACTATGCCGACTCGGGATTGGCAGTCGTT-TA---TTTTGAATGACCTTGTCAGCACCGTATGAGAAATCAAAGTCTTTGGGTTCC-GGGGGGAGTATGGTCGCAAGGCTGAAACTTAAAGGAA--TTGACGGAAGGGCACCACCAGGAGTGGAGCCTGCGGCTTAATTTGACTCAACACGGGGAAACTTACCAGGTCCAGACATAGTAA-GGATTGACAGATTGAGAGCTCTTTCTTGA-TTCTATGGGTGGTGGTGCATGG-CCGTTCTTAGTTGGTG-GAGTGATTTGTCTGGTTAATTCCGTTAACGAACGAGACCTCCGCGTGCTAAATAGTTC-TGCTTACCAA---TTTGGTAGGTA----AGGACTTCTTAGAGGGACTTTCAGTGACT--AACTGAAGGAAGTTGGAGGCAATAACAGGTCTGTGATGCCCTTAGATGTTCTGGGCCGCACGCGCGCTACACTGATACGCTCAACGAGTATATAACCTTGATCGACAGGTCTGGGTAATCTTTTGAATACGTATCGTGCTAGGGATAGATTATTGCAATTATTAATCTTGAACGAGGAATTCCTAGTAAACGCAAGTCATCAGCTTGCATTGATTACGTCCCTGCCCTTTGTACACACCGCCCGTCGCACCTACCGATTGAATGACTCGGTGAAAAATTGGGACC-------GTTG-------ACTAGCCTGC-TTCATTGTGGGCAAATCGATG-GGAACTTT-----------------------------------------------------------------------------
>KP098363
----------------------------------------------------------------------------------------------------------------------------------------------CCTTACTACTTGGATAACCGTAGTAATTCTAGAGCTAATACATGCGT-ACACACCCAACTG---CTTGTCGGACGGGTGGCATTTATTAGATTGAAACCAATGCGA----CTTCGG----TCGGTGTTGTGTTGAGTCATAATAACTGTGCGGATCG------CTT--CACA-----GCGATAGATCCATTGAGTTTCTGCCCTATCAGCTTTGGATGGTAGGATATGGGCCTACCATGGCGTTAACGGGTAACGGGGAATTAGGGTTTGATTCCGGAGAGGGAGCCTTAGAAACGGCTACCACATCCAAGGAAGGCAGCAGGCGCGTAAATTACCCAATCCTGACAC-AGGGAGGTAGTGACAATAAATAACAATG-TCGGGCTTTTTAAGTCTGACAATTGGAATGAGAACAATTTAAATCCCTTAACGAGGATCAATTGGAGGGCAAGTCTGGTGCCAGCAGCCGCGGTAATTCCAGCTCCAATAGCGTATATTAAAGTTGTTGCAGTTAAAAAGCTCGTAGTTGGATTTC--TGGTT-TGAGCG---TCCGGTCGAGCTTGTCTC--------T--GTAC--TATG-GATGTTTGG-G-CCATT-TTTTGTGAGGGGGCCTTT---CTGCCATTGAGTTGG-TGGTTGGGTCGACTTGCA--TCGTTTACTGTGAAAAAATTAGAGTGTTTAAAGCAGGCG-TT--TGCT--CATTTGAATACATTAGCATGGAATAATAAGATACGACCTTGGTGGTCTATTTTGTTGGTTTGCACA-CCGAGGTAATGATTAATAGGGACAGTT-GGGGGTATTCATATTTCAA-CGTCAGAGGTGAAATTCTTGGATCGTTGAAAGATGAGCTTAGGCGAAAGCATTTACCAAGGATGTTTTCATTAATCAAGAACGAAAGTTAGGGGATCGAAGATGATTAGATACCATCGTAGTCTTAACCATAAACTATGCCGACTCGGGATTGGCAGTCGTT-TA---TTTTGAATGACCTTGTCAGCACCGTATGAGAAATCAAAGTCTTTGGGTTCC-GGGGGGAGTATGGTCGCAAGGCTGAAACTTAAAGGAA--TTGACGGAAGGGCACCACCAGGAGTGGAGCCTGCGGCTTAATTTGACTCAACACGGGGAAACTTACCAGGTCCAGACATAGTAA-GGATTGACAGATTGAGAGCTCTTTCTTGA-TTCTATGGGTGGTGGTGCATGG-CCGTTCTTAGTTGGTG-GAGTGATTTGTCTGGTTAATTCCGTTAACGAACGAGACCTCCGCGTGCTAAATAGTTC-TGCTTAC-CA--ATTTGGTAGGTA----AGGACTTCTTAGAGGGACTTTCAGTGACT--AACTGAAGGAAGTTGGAGGCAATAACAGGTCTGTGATGCCCTTAGATGTTCTGGGCCGCACGCGCGCTACACTGATACGCTCAACGAGTATATAACCTTGATCGACAGGTCTGGGTAATCTTTTGAATACGTATCGTGCTAGGGATAGATTATTGCAATTATTAATCTTGAACGAGGAATTCCTAGTAAACGCAAGTCATCAGCTTGCATTGATTACGTCCCTGCCCTTTGTACACACCGCCCGTCGCACCTACCGATTGAATGACTCGGTGAAAAATTGGGACC-------GTTG-------ACTAGCCTGC-TTCATTGTGGGCAAATCGATG-GGAACTTT-----------------------------------------------------------------------------
>AJ238658
----------------------------------ATCATATGCTTGTCTCAAAGATTAAGCCATGCATGTCTAAGTATAAACAATTTTGTACTGTGAAACTGCGAATGGCTCATTATATCAGTTATAGTCTACTTGATAGTACCTTACTACTTGGATAACCGTAGTAATTCTAGAGCTAATACATGCGT-AAATACCCAACTG---CTTGTCGGACGGGTAGCATTTATTAGATTGAAACCAATGCGG----CCTCGG----TCGGTATTGTGTTGAGTCATAATAACTGTGCGGATCG------CTT--CACA-----GCGATAAGTCAATTGAGTTTCTGCCCTATCAGCTTTGGATGGTAGGATATGGGCCTACCATGGCGTTAACGGGTAACGGGGAATTAGGGTTTGATTCCGGAGAGGGAGCCTTAGAAACGGCTACCACATCCAAGGAAGGCAGCAGGCGCGTAAATTACCCAATCCTGACAC-AGGGAGGTAGTGACAATAAATAACAATG-TCGGGCTTTTTAAGTCTGACAATTGGAATGAGAACAATTTACATCCCTTATCGAGGATCAATTGGAGGGCAAGTCTGGTGCCAGCAGCCGCGGTAATTCCAGCTCCAATAGCGTATATTAAAGTTGTTGCAATTAAAAAGCTCGTAGTTGGATTTC--TGGTT-TGAGCG---TCCGGTCGAGTTTATCTC--------T--GTAC--TATG-GATGTTTGG-G-CCATT-TTTTGTGAGGGGGCCTTT---CTGCCATTCAATTGG-TGGTTGAGTCGACTTGCA--TCGTTTACTGTGAAAAAATTAGAGTGTTTAAAGCAGGCG-TT--TGCT--CATTTGAATACATTAGCATGGAATAATAAGATACAACCTTG--GGTCTATTTTGTTGGTTTGCACA-CCGAGGTAATGATTAATAGGGACAGTT-GGGGGTATTCATATTTCAA-CGTCAGAGGTGAAATTCTTGGATCGTTGAAAGATGAGCTTAGGCGAAAGCATTTACCAAGGATGTTTTCATTAATCAAGAACGAAAGTTAGGGGATCGAAGATGATTAGATACCATCGTAGTCTTAACCATAAACTATGCCGACTCGGGATTGGCAGTCGTT-TA---TTTTGAATGACCTTGTCAGCACCGTATGAGAAATCAAAGTCTTTGGGTTCC-GGGGGGAGTATGGTCGCAAGGCTGAAACTTAAAGGAA--TTGACGGAAGGGCACCACCAGGAGTGGAGCCTGCGGCTTAATTTGACTCAACACGGGGAAACTTACCAGGTCCAGACATAGTAA-GGATTGACAGATTGAGAGCTCTTTCTTGA-TTCTATGGGTGGTGGTGCATGG-CCGTTCTTAGTTGGTG-GAGTGATTTGTCTGGTTAATTCCGTTAACGAACGAGACCTCCGCGTGCTAAATAGTCC-TGCTTAC-CA--ATTTGGTAGGTA----AGGACTTCTTAGAGGGACTTTCAGTGACT--AACTGAAGGAAGTTGGAGGCAATAACAGGTCTGTGATGCCCTTAGATGTTCTGGGCCGCACGCGCGCTACACTGATACGCTCAACGAGTATATAACCTTGATCGATAGGTCTGGGTAATCTTTTGAATACGTATCGTGCTAGGGATAGATTATTGCAATTATTAATCTTGAACGAGGAATTCCTAGTAAACGCAAGTCATCAGCTTGCATTGATTACGTCCCTGCCCTTTGTACACACCGCCCGTCGCACCTACCGATTGAATGACTCGGTGAAAAATTGGGACC-------GTTG-------ATTCGCTTGC-TTCATTGTGAGCAAATTGATG-GGAACTTTTTTTAACCTCGCCATTTAGAGGAAGGTGAAGTCGTAACAAGGTTTCCGTAGGTGAACCTGCGGAAGG----------
>AJ238662
--------------------------------------------------------------------GTCTAAGTATAAACAACTTTGTACTGTGAAACTGCGAATGGCTCATTATATCAGTTATAGTCTACTTGATAGTACCTTATAACTTGGATAACCGTAGTAATTCTAGAGTTAATACATGCGT-AAATACCCAACTG---CTTGTCGGACGGGTAGCATTTATTAGATTGAAACCAATGCG----TCTTCGG---GC-GGTGTTGTGTTGAGTCATAATAACTGTGCGGATCG------CTT--CACA-----GCGATAAATCAATTGAGTTTCTGCCCTATCAGCTTTGGATGGTAGGATATGGGCCTACCATGGCGTTAACGGGTAACGGGGAATTAGGGTTTGATTCCGGAGAGGGAGCCTTAGAAACGGCTACCACATCCAAGGAAGGCAGCAGGCGCGTAAATTACCCAATCCTGACAC-AGGGAGGTAGTGACAATAAATAACAATG-TCGGGCTTTTTAAGTCTGACAATTGGAATGAGAACAATTTAAATCCCTTAACGAGGATCAATTGGAGGGCAAGTCTGGTGCCAGCAGCCGCGGTAATTCCAGCTCCAATAGCGTATATTAAAGTTGTTGCAGTTAAAAAGCTCGTAGTTGGATTTC--TGGTT-TGAGCG---TCCGGTCGAGTTTATCTC--------T--GTAC--TATG-GATGTTTGG-G-CCATA-TTTTGTGAGGATGCCTTT---CTGCCATTGAGTTGG-TGGTTGGGTAGACTTGCA--TCGTTTACTGTGAAAAAATTAGAGTGTTTAAAGCAGGCG-TT--TGCT--CATTTGAATACATTAGCATGGAATAATAAGATACGACCTTGGTGGTCTATTTTGTTGGTTTGCACA-CCGAGGTAATGATTAATAGGGACAGTT-GGGGGTATTCATATTTCAA-CGTCAGAGGTGAAATTCTTGGATCGTTGAAAGATGAGCTTAGGCGAAAGCATTTACCAAGGATGTTTTCATTAATCAAGAACGAAAGTTAGGGGATCGAAGATGATTAGATACCATCGTAGTCTTAACCATAAACTATGCCGACTCGGGATTGGCAGTCGTT-TA---TTTTGAATGACCTTGTCAGCACCGTATGAGAAATCAAAGTCTTTGGGTTCC-GGGGGGAGTATGGTCGCAAGGCTGAAACTTAAAGGAA--TTGACGGAAGGGCACCACCAGGAGTGGAGCCTGCGGCTTAATTTGACTCAACACGGGGAAACTTACCAGGTCCAGACATAGTAA-GGATTGACAGATTGAGAGCTCTTTCTTGA-TTCTATGGGTGGTGGTGCATGG-CCGTTCTTAGTTGGTG-GAGTGATTTGTCTGGTTAATTCCGTTAACGAACGAGACCTCCGCGTGCTAAATAGTCC-TGCTTAC-CA--ATGTGGTAGGTA----AGGACTTCTTAGAGGGACTTTCAGTGACT--AACTGAAGGAAGTTGGAGGCAATAACAGGTCTGTGATGCCCTTAGATGTTCTGGGCCGCACGCGCGCTACACTGATACGCTCAACGAGTATATAACCTTGATCGATAGGTCTGGGTAATCTTTTGAATACGTATCGTGCTAGGGATAGATTATTGCAATTATTAATCTTGAACGAGGAATTCCTAGTAAACGCAAGTCATCAGCTTGCATTGATTACGTCCCTGCCCTTTGTACACACCGCCCGTCGCWCCTACCGATTGAATGACTCGGTGAAAAATTGGGACC-------GTTG-------ATTCGCTTGC-TTCATTGTGAGCAAATTGATG-GGAACTTTTTTTAACCTCGCCATTTAGAGGAAGGTGAAGTCGTAACAAGGTTTCCGTAGGTGAACCTGCGGAAG-----------
>KP098369
----------------------------------------------------------------------------------------------------------------------------------------------CCTTACTACTTGGATAACCGTAGTAATTCTAGAGCTAATACATGCGA-AAATACCCAACTG---CTTGTCGGACGGGTAGCATTTATTAGATTGAAACCAATGCG----CTTTCGG---GC-GGTATTGTGTTGAGTCATAATAACTGTGCGGATCG------CTT--TCGA-----GCGATAAATCAATTGAGTTTCTGCCCTATCAGCTTTGGATGGTAGGATATGGGCCTACCATGGCGTTAACGGGTAACGGGGAATTAGGGTTTGATTCCGGAGAGGGAGCCTTAGAAACGGCTACCACATCCAAGGAAGGCAGCAGGCGCGTAAATTACCCAATCCTGACAC-AGGGAGGTAGTGACAATAAATAACAATG-TCGGGCTTTTTAAGTCTGACAATTGGAATGAGAACAATTTAAATCCCTTAACGAGGATCAATTGGAGGGCAAGTCTGGTGCCAGCAGCCGCGGTAATTCCAGCTCCAATAGCGTATATTAAAGTTGTTGCAGTTAAAAAGCTCGTAGTTGGATTTC--TGGTT-TGAGCG---TCCGGTCGAGTTTATCTC--------T--GTAC--TATG-GATGTTTGA-G-CCATA-TTTTGTGAGGATGCCTTT---CTGCCATTCAGTTGG-TGGTTGGGTAGACTTGCA--TCGTTTACTGTGAAAAAATTAGAGTGTTTAAAGCAGGCG-TT--TGCT--CATTTGAATACATTAGCATGGAATAATAAGATACGACCT---TGGTCTATTTTGTTGGTTTGCATA-CCGAGGTAATGATTAATAGGGACAGTT-GGGGGTATTCATATTTCAA-CGTCAGAGGTGAAATTCTTGGATCGTTGAAAGATGAGCTTAGGCGAAAGCATTTACCAAGGATGTTTTCATTAATCAAGAACGAAAGTTAGGGGATCGAAGATGATTAGATACCATCGTAGTCTTAACCATAAACTATGCCGACTCGGGATTGGCAGTCGTT-TA---TTTTGAATGACCTTGTCAGCACCGTATGAGAAATCAAAGTCTTTGGGTTCC-GGGGGGAGTATGGTCGCAAGGCTGAAACTTAAAGGAA--TTGACGGAAGGGCACCACCAGGAGTGGAGCCTGCGGCTTAATTTGACTCAACACGGGGAAACTTACCAGGTCCAGACATAGTAA-GGATTGACAGATTGAGAGCTCTTTCTTGA-TTCTATGGGTGGTGGTGCATGG-CCGTTCTTAGTTGGTG-GAGTGATTTGTCTGGTTAATTCCGTTAACGAACGAGACCTCCGCGTGCTAAATAGTCC-TGCTTAC-CA--ATTTGGTAGGTA----AGGACTTCTTAGAGGGACTTTCAGTGACT--AACTGAAGGAAGTTGGAGGCAATAACAGGTCTGTGATGCCCTTAGATGTTCTGGGCCGCACGCGCGCTACACTGATACGCTCAACGAGTATATAACCTTGATCGATAGGTCTGGGTAATCTTTTGAATACGTATCGTGCTAGGGATAGATTATTGCAATTATTAATCTTGAACGAGGAATTCCTAGTAAACGCAAGTCATCAGCTTGCATTGATTACGTCCCTGCCCTTTGTACACACCGCCCGTCGCACCTACCGATTGAATGACTCGGTGAAAAATTGGGACC-------GTTG-------ATTCGTTTGC-TTCATTGTGAGTGAATTGATG-GGAACTTT-----------------------------------------------------------------------------
>KP098371
----------------------------------------------------------------------------------------------------------------------------------------------CCTTACTACTTGGATAACCGTAGTAATTCTAGAGCTAATACATGCGT-AAATACCCAACTG---CTTGTCGGACGGGTAGCATTTATTAGATTGAAACCAATGCGG----CTTCGG----TCGGTATTGTGTTGAGTCATAATAACTGTGCGGATCG------CTT--TTA------GCGATACATCAATTGAGTTTCTGCCCTATCAGCTTTGGATGGTAGGATATGGGCCTACCATGGCGTTAACGGGTAACGGGGAATTAGGGTTTGATTCCGGAGAGGGAGCCTTAGAAACGGCTACCACATCCAAGGAAGGCAGCAGGCGCGTAAATTACCCAATCCTGACAC-AGGGAGGTAGTGACAATAAATAACAATG-TCGGGCTTTTTAAGTCTGACAATTGGAATGAGAACAATTTAAATCCCTTAACGAGGATCAATTGGAGGGCAAGTCTGGTGCCAGCAGCCGCGGTAATTCCAGCTCCAATAGCGTATATTAAAGTTGTTGCAGTTAAAAAGCTCGTAGTTGGATTTC--TGGTT-TGAGCG---TCCGGTCGAGTTTATCTCT----------GTAC--TATG-GATGTTTGG-G-CCATT-TTTTGTGAGGATGCTTTT---CTGCCATTCAGTTGG-TGGTTGAGTAGACTTGCA--TCGTTTACTGTGAAAAAATTAGAGTGTTTAAAGCAGGCG-TT--TGCT--CATTTGAATACATTAGCATGGAATAATAAGATACGACCTTGGTGGTCTATTTTGTTGGTTTGCACA-CCGAGGTAATGATTAATAGGGACAGTT-GGGGGTATTCATATTTCAA-CGTCAGAGGTGAAATTCTTGGATCGTTGAAAGATGAGCTTAGGCGAAAGCATTTACCAAGGATGTTTTCATTAATCAAGAACGAAAGTTAGGGGATCGAAGATGATTAGATACCATCGTAGTCTTAACCATAAACTATGCCGACTCGGGATTGGCAGTCGTT-T----TTTTGAATGACCTTGTCAGCACCGTATGAGAAATCAAAGTCTTTGGGTTCC-GGGGGGAGTATGGTCGCAAGGCTGAAACTTAAAGGAA--TTGACGGAAGGGCACCACCAGGAGTGGAGCCTGCGGCTTAATTTGACTCAACACGGGGAAACTTACCAGGTCCAGACATAGTAA-GGATTGACAGATTGAGAGCTCTTTCTTGA-TTCTATGGGTGGTGGTGCATGG-CCGTTCTTAGTTGGTG-GAGTGATTTGTCTGGTTAATTCCGTTAACGAACGAGACCTCCGCGTGCTAAATAGTTC-TGCTTAC-CA--TTTTGGTAGGTA----AGGACTTCTTAGAGGGACTTTCAGTGACT--AACTGAAGGAAGTTGGAGGCAATAACAGGTCTGTGATGCCCTTAGATGTTCTGGGCCGCACGCGCGCTACACTGATACGCTCAACGAGTATATAACCTTGATCGATAGGTCTGGGTAATCTTTTGAATACGTATCGTGCTAGGGATAGATTATTGCAATTATTAATCTTGAACGAGGAATTCCTAGTAAACGCAAGTCATCAGCTTGCATTGATTACGTCCCTGCCCTTTGTACACACCGCCCGTCGCACCTACCGATTGAATGACTCGGTGAAAAATTGGGACC-------GTTA-------ATTCTCTTGC-TTCATTGTGAGTCAGTTGATG-GGAACTTT-----------------------------------------------------------------------------
>KP098372
----------------------------------------------------------------------------------------------------------------------------------------------CCTTACTACTTGGATAACCGTAGTAATTCTAGAGCTAATACATGCGT-AAATACCCAACTG---CTTGTCGGACGGGTAGCATTTATTAGATTGAAACCAATGCGG---CTTTCGG----TCGGTATTGTGTTGAGTCATAATAACTGTGCGGATCGCT---------TTTA-----GCGATACATCAATTGAGTTTCTGCCCTATCAGCTTTGGATGGTAGGATATGGGCCTACCATGGCGTTAACGGGTAACGGGGAATTAGGGTTTGATTCCGGAGAGGGAGCCTTAGAAACGGCTACCACATCCAAGGAAGGCAGCAGGCGCGTAAATTACCCAATCCTGACAC-AGGGAGGTAGTGACAATAAATAACAATG-TCGGGCTTTTTAAGTCTGACAATTGGAATGAGAACAATTTAAATCCCTTAACGAGGATCAATTGGAGGGCAAGTCTGGTGCCAGCAGCCGCGGTAATTCCAGCTCCAATAGCGTATATTAAAGTTGTTGCAGTTAAAAAGCTCGTAGTTGGATTTC--TGGTT-TGAGCG---TCCGGTCGAGTTTATCTCT----------GTAC--TATG-GATGTTTGG-G-CCATT-TTTTGTGAGGATGCTTTT---CTGCCATTCAGTTGG-TGGTTGAGTAGACTTGCA--TCGTTTACTGTGAAAAAATTAGAGTGTTTAAAGCAGGCG-TT--TGCT--CATTTGAATACATTAGCATGGAATAATAAGATACGACCTTGGTGGTCTATTTTGTTGGTTTGCACA-CCGAGGTAATGATTAATAGGGACAGTT-GGGGGTATTCATATTTCAA-CGTCAGAGGTGAAATTCTTGGATCGTTGAAAGATGAGCTTACGCGAAAGCATTTACCAAGGATGTTTTCATTAATCAAGAACGAAAGTTAGGGGATCGAAGATGATTAGATACCATCGTAGTCTTAACCATAAACTATGCCGACTCGGGATTGGCAGTCGTT--T---TTTTGAATGACCTTGTCAGCACCGTATGAGAAATCAAAGTCTTTGGGTTCC-GGGGGGAGTATGGTCGCAAGGCTGAAACTTAAAGGAA--TTGACGGAAGGGCACCACCAGGAGTGGAGCCTGCGGCTTAATTTGACTCAACACGGGGAAACTTACCAGGTCCAGACATAGTAA-GGATTGACAGATTGAGAGCTCTTTCTTGA-TTCTATGGGTGGTGGTGCATGG-CCGTTCTTAGTTGGTG-GAGTGATTTGTCTGGTTAATTCCGTTAACGAACGAGACCTCCGCGTGCTAAATAGTTC-TGCTTAC-CA--ATTTGGTAGGTA----AGGACTTCTTAGAGGGACTTTCAGTGACT--AACTGAAGGAAGTTGGAGGCAATAACAGGTCTGTGATGCCCTTAGATGTTCTGGGCCGCACGCGCGCTACACTGATACGCTCAACGAGTATATAACCTTGATCGATAGGTCTGGGTAATCTTTTGAATACGTATCGTGCTAGGGATAGATTATTGCAATTATTAATCTTGAACGAGGAATTCCTAGTAAACGCAAGTCATCAGCTTGCATTGATTACGTCCCTGCCCTTTGTACACACCGCCCGTCGCACCTACCGATTGAATGACTCGGTGAAAAATTGGGACC-------GTTA-------ATTCTCTTGC-TTCATTGTGAGTCAGTTGATG-GGAACTTTTT---------------------------------------------------------------------------
>XR_001099850
-------------ACCUGGUUGAUCCUGCCAGUAGUCAUACGCUUGUCUCAAAGAUUAAGCCAUGCAUGUCUAAGUAUAAACAAUUUUGUACUGUGAAACUGCGAAUGGCUCAUUAUAUCAGUUAUAGUCUACUUGGCAGUACCUUACUACUUGGAUACCCGUAGUAAUUCUAGAGCUAAUACAUGCGU-AAAUACCCAACUG---CUUGUCGGACGGGUAGCAUUUAUUAGAUUGAAACCAAUGCGG----CCUCGG----UCGGUAUUGUGUUGAAUCAUAAUAACUGUGCGGAUCG------CUU--CACA-----GCGAUAAGUCAAUUGAGUUUCUGCCCUAUCAGCUUUGGAUGGUAGGAUAUGGGCCUACCAUGGCGUUAACGGGUAACGGGGAAUUAGGGUUUGAUUCCGGAGAGGGAGCCUUAGAAACGGCUACCACAUCCAAGGAAGGCAGCAGGCGCGUAAAUUACCCAAUCCUGACAC-AGGGAGGUAGUGACAAUAAAUAACAAUGC-CGGGCUUUUCAAGUCUGGCAAUUGGAAUGAGAACAAUUUAAAUCCCUUAACGAGGAUCAAUUGGAGGGCAAGUCUGGUGCCAGCAGCCGCGGUAAUUCCAGCUCCAAUAGCGUAUAUUAAAGUUGUUGCAGUUAAAAAGCUCGUAGUUGGAUUUC--UGGUU-UGAGCG---UCCGGUCGAGUUUAUCUC--------U--GUAC--UAUG-GAUGCUUGG-G-CCAUU-UUUUGUGAGGGGGCGCUU---CUGCCAUUCAGUUGG-UGGUUGUGUCGACUUGCA--UCGUUUACUGUGAAAAAAUUAGAGUGUUUAAAGCAGGCG-UU--UGCU--CAUUUGAAUACAUUAGCAUGGAAUAAUAAGAUACGACCUUGGUGGUCUAUUUUGUUGGUUUGCACA-CCGAGGUAAUGAUUAAUAGGGACAGUU-GGGGGUAUUCAUAUUUCAA-CGUCAGAGGUGAAAUUCUUGGAUCGUUGAAAGAUGAGCUUAGGCGAAAGCAUUUACCAAGGAUGUUUUCAUUAAUCAAGAACGAAAGUUAGGGGAUCGAAGAUGAUUAGAUACCAUCGUAGUCUUAACCAUAAACUAUGCCGACUCGGGAUUGGCAGUCGUU-UA---UUUUGAAUGACCUUGUCAGCACCGUAUGAGAAAUCAAAGUCUUUGGGUUCC-GGGGGGAGUAUGGUCGCAAGGCUGAAACUUAAAGGAA--UUGACGGAAGGGCACCACCAGGAGUGGAGCCUGCGGCUUAAUUUGACUCAACACGGGGAAACUUACCAGGUCCAGACAUAGUAA-GGAUUGACAGAUUGAGAGCUCUUUCUUGA-UUCUAUGGGUGGUGGUGCAUGG-CCGUUCUUAGUUGGUG-GAGUGAUUUGUCUGGUUAAUUCCGUUAACGAACGAGACCUCCGCGUGCUAAAUAGUUC-UGCUUAC-CA--AUUUGGUA----------------------------------------------------------------------------------------------------------------------------------------------------------------------------------------------------------------------------------------------------------------------------------------------------------------------------------------------------------------------------------------------------------------------------------------------------------------------------
>XR_608067
-------------ACCUGGUUGAUCCUGCCAGUAGUCAUACGCUUGUCUCAAAGAUUAAGCCAUGCAUGUCUAAGUAUAAACAACUUUGUACUGUGAAACUGCGAAUGGCUCAUUAUAUCAGUUAUAGUCUACUCGACAGUACCUUACUACUUGGAUAACCGUAGUAAUUCUAGAGCUAAUACAUGCAU-AAAUACCCAACUG---CUUGUCGGACGGGUAGCAUUUAUUAGAUUGAAACCAAUUCA-----CUUCGG-----UGAUUUUGUGUUGAAUCAUAAUAACUGUGCUGAUCGCU---------CUAA-----GCGAUAAGUCGAUUGAGUUUCUGCCCUAUCAGCUUUGGAUGGUAGGAUAUGGGCCUACCAUGGCGUUAACGGGUAACGGGGAAUUAGGGUUUGAUUCCGGAGAGGGAGCCUUAGAAACGGCUACCACAUCCAAGGAAGGCAGCAGGCGCGUAAAUUACCCAAUCCUGACAC-AGGGAGGUAGUGACAAUAAAUAACAAUGC-CGGGCUAAUUUAGUCUGGCAAUUGGAAUGAGAACAAUUUAAAUCCCUUAACGAGGAUCAAUUGGAGGGCAAGUCUGGUGCCAGCAGCCGCGGUAAUUCCAGCUCCAAUAGCGUAUAUUAAAGUUGUUGCAGUUAAAAAGCUCGUAGUUGGAUUUC--UGGUU-UGAGCG---UCCGGUCGAC----------GAAAUGUCAGUAC--UAUG-GAUGUUUGG-G-CCAUA-UUUUGUGAGGAUGCCUUU---CUGCCAUUGAGUUGG-UGGUUGGGUGGACUUGCA--UCGUUUACUGUGAAAAAAUUAGAGUGUUUAAAGCAGGCG-UU--UGCU--CAUUUGAAUACAUUAGCAUGGAAUAAUAAGAUACGACCUUGGUGGUCUAUUUUGUUGGUUUGCACG-CCAGGGUAAUGAUUAAUAGGGACAGUU-GGGGGUAUUCAUAUUUCAA-CGUCAGAGGUGAAAUUCUUGGAUCGUUGAAAGAUGAGCUUAGGCGAAAGCAUUUACCAAGGAUGUUUUCAUUAAUCAAGAACGAAAGUCAGGGGAUCGAAGAUGAUUAGAUACCAUCGUAGUCUUGACCAUAAACUAUGCCGACUCGGGAUUGGCAGUCGUU-UA---AUUAGAAUGACCUUGUCAGCACCGUAUGAGAAAUCAAAGUCUUUGGGUUCC-GGGGGGAGUAUGGUCGCAAGGCUGAAACUUAAAGGAA--UUGACGGAAGGGCACCACCAGGAGUGGAGCCUGCGGCUUAAUUUGACUCAACACGGGGAAACUUACCAGGUCCAGACAUAGUAA-GGAUUGACAGAUUGAGAGCUCUUUCUUGA-UUCUAUGGGUGGUGGUGCAUGG-CCGUUCUUAGUUGGUG-GAGUGAUUUGUCUGGUUAAUUCCGUUAACGAACGAGACCUCCGCGUGCUAAAUAGUCC-UGCUUACCAA---UUUGGUAGGUA----AGGACUUCUUAGAGGGACUUUCAGUGACU--AACUGAAGGAAGUUGGAGGCAAUAACAGGUCUGUGAUGCCCUUAGAUGUUCUGGGCCGCACGCGCGCUACACUGGUACGCUCAACGAGUAUAUAACCUUGAUCGAUAGGUCUGGGUAAUCUUUUGAAUACGUAUCGUGCUAGGGAUAGAUUAUUGCAAUUAUUAAUCUUGAACGAGGAAUUCCUAGUAAACGCAAGUCAUCAGCUUGCAUUGAUUACGUCCCUGCCCUUUGUACACACCGCCCGUCGCACCUACCGAUUGAAUGACUCGGUGAGAAAUUGGGACC-------GCUG-------UUUCGCUUGC-UUCAUUGUGAGUGAAACGGUG-GGAACUUUUUCUAACCUCGCCAUUUAGAGGAAGGUGAAGUCGUAACAAGGUUUCCGUAGGUGAACCUGCGGAAGGAUCAUUA---
>XR_717099
-------------ACCUGGUUGAUCCUGCCAGUAGUCAUACGCUUGUCUCAAAGAUUAAGCCAUGCAUGUCUAAGUAUAAACAACUUUGUACUGUGAAACUGCGAAUGGCUCAUUAUAUCAGUUAUAGUCUACUCGACAGUACCUUACUACUUGGAUAACCGUAGUAAUUCUAGAGCUAAUACAUGCAU-AAAUACCCAACUG---CUUGUCGGACGGGUAGCAUUUAUUAGAUUGAAACCAAUUC-----ACUUCGG-----UGAUUUUGUGUUGAAUCAUAAUAACUGUGCUGAUCGCU---------CUAA-----GCGAUAAGUCGAUUGAGUUUCUGCCCUAUCAGCUUUGGAUGGUAGGAUAUGGGCCUACCAUGGCGUUAACGGGUAACGGGGAAUUAGGGUUUGAUUCCGGAGAGGGAGCCUUAGAAACGGCUACCACAUCCAAGGAAGGCAGCAGGCGCGUAAAUUACCCAAUCCUGACAC-AGGGAGGUAGUGACAAUAAAUAACAAUGC-CGGGCUAAUUUAGUCUGGCAAUUGGAAUGAGAACAAUUUAAAUCCCUUAACGAGGAUCAAUUGGAGGGCAAGUCUGGUGCCAGCAGCCGCGGUAAUUCCAGCUCCAAUAGCGUAUAUUAAAGUUGUUGCAGUUAAAAAGCUCGUAGUUGGAUUUC--UGGUU-UGAGCG---UCCGGUCGAC--UUUAU------GUCA--GUAC--UAUG-GAUGUUUGG-G-CCAUA-UUUUGUGAGGAUGCCUUU---CUGCCAUUGAGUUGG-UGGUUAGGUGGACUUGCA--UCGUUUACUGUGAAAAAAUUAGAGUGUUUAAAGCAGGCG-UU--UGCU--CAUUUGAAUACAUUAGCAUGGAAUAAUAAGAUACGACCUUGGUGGUCUAUUUUGUUGGUUUGCACG-CCAGGGUAAUGAUUAAUAGGGACAGUU-GGGGGUAUUCAUAUUUCAA-CGUCAGAGGUGAAAUUCUUGGAUCGUUGAAAGAUGAGCUUAGGCGAAAGCAUUUACCAAGGAUGUUUUCAUUAAUCAAGAACGAAAGUCAGGGGAUCGAAGAUGAUUAGAUACCAUCGUAGUCUUGACCAUAAACUAUGCCGACUCGGGAUUGGCAGUCGUU-UA---AUUAGAAUGACCUUGUCAGCACCGUAUGAGAAAUCAAAGUCUUUGGGUUCC-GGGGGGAGUAUGGUCGCAAGGCUGAAACUUAAAGGAA--UUGACGGAAGGGCACCACCAGGAGUGGAGCCUGCGGCUUAAUUUGACUCAACACGGGGAAACUUACCAGGUCCAGACAUAGUAA-GGAUUGACAGAUUGAGAGCUCUUUCUUGA-UUCUAUGGGUGGUGGUGCAUGG-CCGUUCUUAGUUGGUG-GAGUGAUUUGUCUGGUUAAUUCCGUUAACGAACGAGACCUCCGCGUGCUAAAUAGUCC-UGCUUAC-CA--AUUUGGUAGGUA----AGGACUUCUUAGAGGGACUUUCAGUGACU--AACUGAAGGAAGUUGGAGGCAAUAACAGGUCUGUGAUGCCCUUAGAUGUUCUGGGCCGCACGCGCGCUACACUGGUACGCUCAACGAGUAUAUAACCUUGAUCGAUAGGUCUGGGUAAUCUUUUGAAUACGUAUCGUGCUAGGGAUAGAUUAUUGCAAUUAUUAAUCUUGAACGAGGAAUUCCUAGUAAACGCAAGUCAUCAGCUUGCAUUGAUUACGUCCCUGCCCUUUGUACACACCGCCCGUCGCACCUACCGAUUGAAUGACUCGGUGAGAAAUUGGGACC-------GUUG-------UUUCGCUUGC-UUCAUUGUGAGUGGAACGGUG-GGAACUUUUUCUAACCUCGCCAUUUAGAGGAAGGUGAAGUCGUAACAAGGUUUCCGUAGGUGAACCUGCGGAAGGAUCAUUA---
>KF294791
---------------------------------------------------------------------------------------------------------------------------------------------------------------------TAATTCTAGAGCTAATACATGCAATAAATACCCAACTG---TTTATCGGACGGGTAGCATTTATTAGAAAGAAACCAATTC-----CTTTTAG------GATATTGTGTTGAATCATAATAACTGTGCGGATCG------CTT--TTA------GCGATAAGTCGATTGAGTTTCTGCCCTATCAGCTTTGGATGGTAGGATATGGGCCTACCATGGCGTTAACGGGTAACGGGGAATTAGGGTTTGATTCCGGAGAGGGAGCCTTAGAAACGGCTACCACATCCAAGGAAGGCAGCAGGCGCGTAAATTACCCAATCCTGACAC-AGGGAGGTAGTGACAATAAATAACAATG-TCGGGCTACTTTAGTCTGACAATTGGAATGAGTACAATTTAAATCCCTTAACGAGGATCAATTGGAGGGCAAGTCTGGTGCCAGCAGCCGCGGTAATTCCAGCTCCAATAGCGTATATTAAAGTTGTTGCAGTTAAAAAGCTCGTAGTTGGATTTC--TGGTT-TGAGCA---TCCGGTCGACTTTCTTTTGTAAAGTTT--GTACTTTTTG-GATGTTTGG-G-CCATTATTTTGTGAGGATATTTTT---CTGCCATTGAGTTGG-TGGTTAAATAAACTTGCA--TCGTTTACTGTGAAAAAATTAGAGTGTTTAAAGCAGGCGTGT--TGCT--CATTTGAATACATTAGCATGGAATAATAAGATACGACCT---TGGTCTATTTTGTTGGTTTGCATA-CCAGGGTAATGATTAATAGGGACAGTT-GGGGGTATTCATATTTCAA-CGTCAGAGGTGAAATTCTTGGATCGTTGAAAGATGAGCTTAGGCGAAAGCATTTACCAAGGATGTTTTCATTAATCAAGAACGAAAGTCAAGGGATCGAAGATGATTAGATACCATCGTAGTCTTGACCATAAACTATGCCGACTCGGGATTGGCAGTCGTT-TA---TATTGAATGACCTTGTCAGCACCGTATGAGAAATCAAAGTCTTTGGGTTCC-GGGGGGAGTATGGTCGCAAGGCTGAAACTTAAAGGAA--TTGACGGAAGGGCACCACCAGGAGTGGAGCCTGCGGCTTAATTTGACTCAACACGGGGAAACTTACCAGGTCCAGACATAGTAA-GGATTGACAGATTGAGAGCTCTTTCTTGA-TTCTATGGGTGGTGGTGCATGG-CCGTTCTTAGTTGGTG-GAGTGATTTGTCTGGTTAATTCCGTTAACGAACGAGACCTCCGCGTGCTAAATAGTTC-AGCTTAC-CA--ATTTGGTAGGTCTTTTTGAACTTCTTAGAGGGACTTTCAGTGACT--AACTGAAGGAAGTTGGAGGCAATAACAGGTCTGTGATGCCCTTAGATGTTCTGGGCCGCACGCGCGCTACACTGGTACGCTCAACAAGTATATAACCTTGATCGATAGGTCTGGGTAATCTTTTGAATACGTATCGTGCTAGGGATAGATTATTGCAATTATTAATCTTGAACGAGGAATTCCTAGTAAACGCAAGTCATCAGCTTGCATTGATTACGTCCCTGCCCTTTGTACACACCGCCCGTCGCACCTACCGATTGAATGACTCGGTGAGAAATTGGGACC-------GTTG-------TTTCA-----------------------------------------------------------------------------------------------------------------
>KR869807
---------------------------------AGTCATACGCTTGTCTCAAAGATTAAGCCATGCATGTCTAAGTATAAACAATTTTGTACTGTGAAACTGCGAATGGCTCATTATATCAGTTATAGTCTACTTGATAGTACCTTACTACTTGGATAACCGTAGTAATTCTAGAGCTAATACATGCGC-AAATACCCAACTG---CTTGTCGGGCGGGTAGCATTTATTAGATTGAAACCAATGCAG----CTTCGG----CTGGTATTGTGTTGAGTCATAATAACTGTGCGGATCGCG----TTTCATTAC-----GCGATAAATCAATTGAGTTTCTGCCCTATCAGCTTTGGATGGTAGGATATGGGCCTACCATGGCGTTAACGGGTAACGGGGAATTAGGGTTTGATTCCGGAGAGGGAGCCTTAGAAACGGCTACCACATCCAAGGAAGGCAGCAGGCGCGTAAATTACCCAATCCTGACAC-AGGGAGGTAGTGACAATAAATAACAATGC-CGGGCTTTTTAAGTCTGGCAATTGGAATGAGAACAATTTAAATCCCTTAACGAGGATCAATTGGAGGGCAAGTCTGGTGCCAGCAGCCGCGGTAATTCCAGCTCCAATAGCGTATATTAAAGTTGTTGCAGTTAAAAAGCTCGTAGTTGGATTTC--TGATT-TGAGCG---TCCGGTCCGC---TTCTTTTGAAGCGC--GAAC--TATG-GATGTTTGG-G-TCATT-TTTTGTGAGGATGCCTTT---CTGCCATTAAGTTGG-TGGTTGGGTGGACTTGCA--TCGTTTACTGTGAAAAAATTAGAGTGTTTAAAGCAGGCG-TT--TGCT--CATTTGAATACATTAGCATGGAATAATAAGATACGGCCTTGGTGGTCTATTTTGTTGGTTTGCACG-CCAGGGTAATGATTAATAGGGACAGTT-GGGGGTATTCATATTTCAG-CGTCAGAGGTGAAATTCTTGGATCGCTGAAAGATGAGCTTAGGCGAAAGCATTTA----------------------------------------------------------------------------------------------------------------------------------------------------------------------------------------------------------------------------------------------------------------------------------------------------------------------------------------------------------------------------------------------------------------------------------------------------------------------------------------------------------------------------------------------------------------------------------------------------------------------------------------------------------------------------------------------------------------------------------------------------------------------------------------------------------------------------------------------------------------------------------------------------------------------------------
>AJ238663
-----------------------------------TCATATGCTTGTCTCAAAGATTAAGCCATGCATGTCTAAGTATAAACAATTTTGTACTGTGAAACTGCGAATGGCTCATTATATCAGTTATAGTCTACTTGATAGTACCTTACTACTTGGATAACCGTAGTAATTCTAGAGCTAATACATGCGC-AAATACCCAACTG---CTTGTCGGACGGGTAGCATTTATTAGATTGAAACCAATGCAG----CTTCGG----CTGGTATTGTGTTGAGTCATAATAACTGTGCGGATCGCG--TTCTT--TAAC-----GCGATAAATCAATTGAGTTTCTGCCCTATCAGCTTTGGATGGTAGGATATGGGCCTACCATGGCGTTAACGGGTAACGGGGAATTAGGGTTTGATTCCGGAGAGGGAGCCTTAGAAACGGCTACCACATCCAAGGAAGGCAGCAGGCGCGTAAATTACCCAATCCTGACAC-AGGGAGGTAGTGACAATAAATAACAATG-TCGGGCTTTTTAAGTCTGACAATTGGAATGAGAACAATTTAAATCCCTTAACGAGGATCAATTGGAGGGCAAGTCTGGTGCCAGCAGCCGCGGTAATTCCAGCTCCAATAGCGTATATTAAAGTTGTTGCAGTTAAAAAGCTCGTAGTTGGATTTC--TGATT-TGAGCG---TCCGGTCCGA--TTCTTCGTGAATCGC--GAAC--TATG-GATGTTTGG-G-TCATT-TTTTGTGAGGATGCCTTT---CTGCCATTAAGTTGG-TGGTTAGGTGGACTTGCA--TCGTTTACTGTGAAAAAATTAGAGTGTTTAAAGCAGGCG-TT--TGCT--CATTTGAATACATTAGCATGGAATAATAAGATACGACCTTGGTGGTCTATTTTGTTGGTTTGCACG-CCAGGGTAATGATTAATAGGGACAGTT-GGGGGTATTCATATTTCAG-CGTCAGAGGTGAAATTCTTGGATCGTTGAAAGATGAGCTTAGGCGAAAGCATTTACCAAGGATGTTTTCATTAATCAAGAACGAAAGTTAGGGGATCGAAGATGATTAGATACCATCGTAGTCTTAACCATAAACTATGCCGACTCGGGATTGGCAGTCGTT-TA---ATTTGAATGACCTTGTCAGCACCGTATGAGAAATCAAAGTCTTTGGGTTCC-GGGGGGAGTATGGTCGCAAGGCTGAAACTTAAAGGAA--TTGACGGAAGGGCACCACCAGGAGTGGAGCCTGCGGCTTAATTTGACTCAACACGGGGAAACTTACCAGGTCCAGACATAGTAA-GGATTGACAGATTGAGAGCTCTTTCTTGA-TTCTATGGGTGGTGGTGCATGG-CCGTTCTTAGTTGGTG-GAGTGATTTGTCTGGTTAATTCCGTTAACGAACGAGACCTCCGCGTGCTAAATAGTCC-CGCTTAC-AA-TTTTTTGTAGGTTTTT-GGGACTTCTTAGAGGGACTTTTGGGTAATCAAACCAAAGGAAGTTGGAGGCAATAACAGGTCTGTGATGCCCTTAGATGTTCTGGGCCGCACGCGCGCTACACTGATGCGTTCAACGAGTATACAACCTTGATCGATAGGTCTGGGTAATCTTTTGAATACGTATCGTGCTAGGGATAGATTATTGCAATTATTAATCTTGAACGAGGAATTCCTAGTAAACGCAAGTCATCAGCTTGCATTGATTACGTCCCTGCCCTTTGTACACACCGCCCGTCGCACCTACCGATTGAATGACTCGGTGAAAAATTGGGACT-------GTTG-------ATATGCTTTC-TTTATTGAGAGCAAATCGATG-GGAACTTTTTTTAACCTCGCCATTTAGAGGAAGGTGAAGTCGTAACAAGGTTTCCGTAGGTGAACCTGCGGAA------------
>EU271965
--------------------------------------------------------------------GTCTAAGTATAAACAATTTTGTACTGTGAAACTGCGAATGGCTCATTATATCAGTTATAGTCTACTTGATAGTACCTTACTACTTGGATAACCGTAGTAATTCTAGAGCTAATACATGCGC-AAATACCCAACTG---CTTGTCGGACGGGTAGCATTTATTAGATTGAAACCAATGCAG----CTTCGG----CTGGTATTGTGTTGAGTCATAATAACTGTGCGGATCGCG----TTTCATTAC-----GCGATAAATCAATTGAGTTTCTGCCCTATCAGCTTTGGATGGTAGGATATGGGCCTACCATGGCGTTAACGGGTAACGGGGAATTAGGGTTTGATTCCGGAGAGGGAGCCTTAGAAACGGCTACCACATCCAAGGAAGGCAGCAGGCGCGTAAATTACCCAATCCTGACAC-AGGGAGGTAGTGACAATAAATAACAATGC-CGCGCTTTTAAAGTCTGGCAATTGGAATGAGAACAATTTAAATCCCTTAACGAGGATCAATTGGAGGGCAAGTCTGGTGCCAGCAGCCGCGGTAATTCCAGCTCCAATAGCGTATATTAAAGTTGTTGCAGTTAAAAAGCTCGTAGTTGGATTTC--TGATT-TGAACG---TCCGGTCGCG--TTCTTC--GAAGCGC--GAAC--TATG-GATGTTTGG-A-TCATT-TTTTGTGAGGATGCCTTT---CTGCCATTAAGTTGG-TGGTTGGGTGGACTTGCA--TCGTTTACTGTGAAAAAATTAGAGTCTTTAAAGCAGGCG-TT--TGCT--CATTTGAATACATTAGCATGGAATAATAAGATACGACCTTGGTGGTCTATTTTGTTGGTTTGCACA-CCAGGGTAATGATTAATAGGGACAGTT-GGGGGTATTCATATTTCAG-CGTCAGAGGTGAAATTCTTGGATCGCTGAAAGATGAGCTTAGGCGAAAGCATTTACCAAGGATGTTTTCATTAATCAAGAACGAAAGTTAGGGGATCGAAGATGATTAGATACCATCGTAGTCTTAACCATAAACTATGCCGACTCGGGATTGGCAGTCGTT-TA---TTTTGAATGACCTTGTCAGCACCGTATGAGAAATCAAAGTCTTTGGGTTCC-GGGGGGAGTATGGTCGCAAGGCTGAAACTTAAAGGAA--TTGACGGAAGGGCACCACCAGGAGTGGAGCCTGCGGCTTAATTTGACTCAACACGGGAAAACTTACCAGGTCCAGACATAGTAA-GGATTGACAGATTGAGAGCTCTTTYTTGATTTCTATGGGKGGKGGTGCATGG-CCGTTATTAGTTGGTG-GAGTGATTTGTATGGTTAATTCCGTTAACGAACGAGACCTCCGCGTGCTAAATAGTTY-TGCTTAC-AA--TTTTTGTAGGTA----AGG-----------------------------------------------------------------------------------------------------------------------------------------------------------------------------------------------------------------------------------------------------------------------------------------------------------------------------------------------------------------------------------------------------------------------------------------------------------------
>KT273921
---------------------------------------------------------------------------------------------------CTGCGAATGGCTCATTATATCAGTTATAGTCTACTCGATAGTACCTTACTACTTGGATAACCGTAGTAATTCTAGAGCTAATACATGCGC-AAATACCCAACTG---CTTGTCGGGCGGGTAGCATTTATTAGATTGAAACCAATGCAG----CTTCGG----CTGGTATTGTGTTGAGTCATAATAACTGTGCGGATCGCG----TTTCATTAC-----GCGATAAATCGATTGAGTTTCTGCCCTATCAGCTTTGGATGGTAGGATATGGGCCTACCATGGCGTTAACGGGTAACGGGGAATTAGGGTTTGATTCCGGAGAGGGAGCCTTAGAAACGGCTACCACATCCAAGGAAGGCAGCAGGCGCGTAAATTACCCAATCCTGACAC-AGGGAGGTAGTGACAATAAATAACAATGC-CGGGCTTTTTAAGTCTGGCAATTGGAATGAGAACAATTTAAATCCCTTAACGAGGATCAATTGGAGGGCAAGTCTGGTGCCAGCAGCCGCGGTAATTCCAGCTCCAATAGCGTATATTAAAGTTGTTGCAGTTAAAAAGCTCGTAGTTGGATTTC--TGGTT-TGAGCG---TCCGGTCCGC---CTCTTACGGGGCGC--GTAC--TATG-GATGTTTGG-G-CCATT-TTTTGTGAGGATGCCTTT---CTGCCATTAAGTTGG-TGGTTGGGTGGACTTGCA--TCGTTTACTGTGAAAAAATTAGAGTGTTTAAAGCAGGCG-TT--TGCT--CATTTGAATACATTAGCATGGAATAATAAGATACGACTTTGGTGGTCTATTTTGTTGGTTTGCACG-CCAGAGTAATGATTAATAGGGACAGTT-GGGGGTATTCATATTTCAG-CGTCAGAGGTGAAATTCTTGGATCGCTGAAAGATGAGCTTAGGCGAAAGCATTTACCAAGGATGTTTTCATTAATCAAGAACGAAAGTTAGGGGATCGAAGATGATTAGATACCATCGTAGTCTTAACCATAAACTATGCCGACTCGGGATTGGCAGTCGTT-TA---ATTTGAATGACCTTGTCAGCACCGTATGAGAAATCAAAGTCTTTGGGTTCC-GGGGGGAGTATGGTCGCAAGGCTGAAACTTAAAGGAA--TTGACGGAAGGGCACCACCAGG------------------------------------------------------------------------------------------------------------------------------------------------------------------------------------------------------------------------------------------------------------------------------------------------------------------------------------------------------------------------------------------------------------------------------------------------------------------------------------------------------------------------------------------------------------------------------------------------------------------------------------------------------------------------------------------------
>AB548399
----------------------------------------------------------------GCATGTCTAAGTATAAGCAA--TTGTACTGTGAAACTGCGAATGGCTCATTATATCAGTTATAGTCTACTTGATAGTACCTTACTACTTGGATAACCGTAGTAATTCTAGAGCTAATACATGCGC-AAATACCCAACTG---CTTGTCGGGCGGGTAGCATTTATTAGATTGAAACCAATGCAG---CTTTCGG---GCTGGTATTGTGTTGAGTCATAATAACTGTGCGGATCGCG----TTTCATTAC-----GCGATAAATCAATTGAGTTTCTGCCCTATCAGCTTTGGATGGTAGGATATGGGCCTACCATGGCGTTAACGGGTAACGGGGAATTAGGGTTTGATTCCGGAGAGGGAGCCTTAGAAACGGCTACCACATCCAAGGAAGGCAGCAGGCGCGTAAATTACCCAATCCTGATAC-AGGGAGGTAGTGACAATAAATAACAATGCCATG--CTTTAAAGTATGGCAATTGGAATGAGAACAATTTAAATCCCTTAACGAGGATCAATTGGAGGGCAAGTCTGGTGCCAGCAGCCGCGGTAATTCCAGCTCCAATAGCGTATATTAAAGTTGTTGCAGTTAAAAAGCTCGTAGTTGGATTTC--TGATT-TGGACG---TCCGGTCCGT--CTCCTTGTGAGATGC--GTAC--TATG-GATGTTTGG-G-TCATT-TTTTGTGAGGATGTTCTT---CTGCCATTAAGTTGG-TGGTTGAATAGACTTGCA--TCGTTTACTGTGAAAAAATTAGAGTGTTTAAAGCAGGCATTT--TGCT---CATTGAATACATTAGCATGGAATAATAAAATACGACCTTGGTGGTCTATTTTGTTGGTTTGCACA-CCAGGGTAATGATTAATAGGGACAGTT-GGGGGTATTCATATTTCAG-CGTCAGAGGTGAAATTCTTGGATCGCTGAAAGATGAGCTTAGGCGAAAGCATTTATCAAGGATGTTTTCATTAATCAAGAACGAAAGTTAGGGGATCGAAGATGATTAGATACCATCGTAGTCTTAACCATAAACTATGCCGACTCGGGATTGGCAGTCGTT-TA---ATTTAAATGACCTTGTCAGCACCGTATGAGAAATCAAAGTCTTTGGGTTCC-GGGGGGAGTATGGTCGCAAGGCTGAAACTTAAAGGAA--TTGACGGAAGGGCACCACCAGGAGTGGAGCCTGCGGCTTAATTTGACTCAACACGGGAAAACTTACCAGGTCCAGACATAGTAA-GGATTGACAGATTGAGAGCTCTTTCTTGA-TTCTATGGGTGGTGGTGCATGG-CCGTTCTTAGTTGGTG-GAGTGATTTGTCTGGTTAATTCCGTTAACGAACGAGACCTCCGCGTGCTAAATAGTTT-CGCTTAC-AA-TATTTTGTAGGTTTT--GAAACTTCTTAGAGGGACTTTTGGTGATT--AACCAAAGGAAGTTGGAGGCAATAACAGGTCTGTGATGCCCTTAGATGTTCTGGGCCGCACGCGCGCTACACTGATGCGTTCAACGAGTTTAAAACCTTGACCGATAGGTCTGGGTAATCTTTTGAATGCGCATCGTGCTAGGGATAGATTATTGCAATTATTAATCTTGAACGAGGAATTCCTAGTAAACGCAAGTCATCAGCTTGCATTGATTACGTCCCTGCCCTTTGTACACACCGCCCGTCGCACCTACCGATTGAATGACTCGGTGAAAAATTGGGACC-------GGAG-------ACTCGTTTGC-TTTATTGCGAGTGAATTTCTG-GGAACTTTTTTAAACCTCG------------------------------------------------------------------
>JN635272
-------------------------------------------------------TTAAGCCATGCATGTCTAAGTATAAACACTTTTGTACTGTGAAACTGCGAATGGCTCATTATATCAGTTATAGTCTACTCGATAGTACCTTACTACTTGGATACCCGTAGTAATTCTAGAGCTAATACATGCAT-CAATACCCAACTG---CTTGTCGGGCGGGTAGCATTTATTAGATTGAAACCAATGCAG---TCTTCGG---GCTGGTATTGTGTTGAGTCATAATAACTGTGCGGATCGCG----CTT--TTGC-----GCGATAAATCGATTGAGTTTCTGCCCTATCAGCTTTGGATGGTAGGATATGGGCCTACCATGGCATTAACGGGTAACGGGGAATTAGGGTTTGATTCCGGAGAGGGAGCCTTAGAAACGGCTACCACATCCAAGGAAGGCAGCAGGCGCGTAAATTACCCAATCCTGACAC-AGGGAGGTAGTGACAATAAATAACAATGCTCTGGCTCTTCGAGTCGGGCAATTGGAATGAGAACAATTTAAATCCCTTAACGAGGATCAATTGGAGGGCAAGTCTGGTGCCAGCAGCCGCGGTAATTCCAGCTCCAATAGCGTATATTAAAGTTGTTGCAGTTAAAAAGCTCGTAGTTGGATTTC--TGTTT-TGGATG---TCCGGTCCGC--TCCCTCTGGGAGTGC--GTAC-TTATG-GATGTTCGA-G-GCATT-TTTTGTGAGGCTGCCTTT---CTGCCATTAAGTTGG-TGGGTTGGTGGGCTTGCA--TCGTTTACTGTGAAAAAATTAGAGTGTTTAAAGCAGGCG-TT--TGCT--CATTTGAATACATTAGCATGGAATAATAAGATACGGCCTTGGTGGTCTATTTTGTTGGTTTGCACA-CCAGGGTAATGATTAATAGGGACAGTT-GGGGGTATTCATATTTCAG-CGTCAGAGGTGAAATTCTTGGATCGCTGAAAGATGAGCTTAGGCGAAAGCATTTACCAAGGATGTTTTCATTAATCAAGAACGAAAGTTAGGGGATCGAAGATGATTAGATACCATCGTAGTCTTAACCATAAACTATGCCGACTCGGGATTGGCAGTCGTT-TA---CCTTAAATGACCTTGTCAGCACCGTATGAGAAATCAAAGTCTTTGGGTTCC-GGGGGGAGTATGGTCGCAAGGCTGAAACTTAAAGGAA--TTGACGGAAGGGCACCACCAGGAGTGGAGCCTGCGGCTTAATTTGACTCAACACGGGAAAACTTACCAGGTCCAGACATAGTAA-GGATTGACAGATTGAGAGCTCTTTCTTGA-TTCTATGGGTGGTGGTGCATGG-CCGTTCTTAGTTGGTG-GAGTGATTTGTCTGGTTAATTCCGTTAACGAACGAGACCTCCGCGTGCTAAATAGTTC-CGCTTAC-CA-TTTTTGGTAGGTTTG--TGGACTTCTTAGAGGGACTTTTGGGTAATCAAACCAAAGGAAGTTGGAGGCAATAACAGGTCTGTGATGCCCTTAGATGTTCTGGGCCGCACGCGCGCTACACTGATGCGTTCAACGAGTATACAACCTTGATCGATAGGTCTGGGTAATCTTGTGAATGCGCATCGTGCTAGGGATAGACTGTTGCAATTTTCAGTCTTGAACGAGGAATTCCTAGTAAACGCAAGTCATCAGCTTGCATTGATTACGTCCCTGCCCTTTGTACACACCGCCCGTCGCACCTACCGATTGAATGACTCGGTGAAAAATTGGGACC-------GTGA-------GTCCGTTTGC-TTCATTGCGAGTGGATTGATG-G------------------------------------------------------------------------------------
>JN635176
-------------------------------------------------------TTAAGCCATGCATGTGTAAGTATAAACACTTTTGTACTGTGAAACTGCGAATGGCTCATTATATCAGTTATAGTCTACTCGATAGTACCTTACTACTTGGATACCCGTAGTAATTCTAGAGCTAATACATGCAT-CAATACCCAACTG---CTTGTCGGGCGGGTAGCATTTATTAGATTGAAACCAATGCAG---TCTTCGG---GCTGGTATTGTGTTGAGTCATAATAACTGTGCGGATCGCG----CTT--TTGC-----GCGATAAATCGATTGAGTTTCTGCCCTATCAGCTTTGGATGGTAGGATATGGGCCTACCATGGCATTAACGGGTAACGGGGAATTAGGGTTTGATTCCGGAGAGGGAGCCTTAGAAACGGCTACCACATCCAAGGAAGGCAGCAGGCGCGTAAATTACCCAATCCTGACAC-AGGGAGGTAGTGACAATAAATAACAATGCTCTGGCTCTTCGAGTCGGGCAATTGGAATGAGAACAATTTAAATCCCTTAACGAGGATCAATTGGAGGGCAAGTCTGGTGCCAGCAGCCGCGGTAATTCCAGCTCCAATAGCGTATATTAAAGTTGTTGCAGTTAAAAAGCTCGTAGTTGGATTTC--TGTTT-TGGATG---TCCGGTCCGC--TCCCTCTGGGAGTGT--GTAC-TTATG-GATGTTCGA-G-GCATT-TTTTGTGAGGCTGCCTTT---CTGCCATTAAGTTGG-TGGGTTGGTGGGTTTGCA--TCGTTTACTGTGAAAAAATTAGAGTGTTTAAAGCAGGCG-TT--TGCT--CATTTGAATACATTAGCATGGAATAATAAGATACGGCCTTGGTGGTCTATTTTGTTGGTTTGCACA-CCAGGGTAATGATTAATAGGGACAGTT-GGGGGTATTCATATTTCAG-CGTCAGAGGTGAAATTCTTGGATCGCTGAAAGATGAGCTTAGGCGAAAGCATTTACCAAGGATGTTTTCATTAATCAAGAACGAAAGTTAGGGGATCGAAGATGATTAGATACCATCGTAGTCTTAACCATAAACTATGCCGACTCGGGATTGGCAGTCGTT-TA---CTTTAAATGACCTTGTCAGCACCGTATGAGAAATCAAAGTCTTTGGGTTCC-GGGGGGAGTATGGTCGCAAGGCTGAAACTTAAAGGAA--TTGACGGAAGGGCACCACCAGGAGTGGAGCCTGCGGCTTAATTTGACTCAACACGGGAAAACTTACCAGGTCCAGACATAGTAA-GGATTGACAGATTGAGAGCTCTTTCTTGA-TTCTATGGGTGGTGGTGCATGG-CCGTTCTTAGTTGGTG-GAGTGATTTGTCTGGTTAATTCCGTTAACGAACGAGACCTCCGCGTGCTAAATAGTTC-CGCTTAC-CA-TTTTTGGTAGGTTTG--TGGACTTCTTAGAGGGACTTTTGGGTAATCAAACCAAAGGAAGTTGGAGGCAATAACAGGTCTGTGATGCCCTTAGATGTTCTGGGCCGCACGCGCGCTACACTGATGCGTTCAACGAGTATACAACCTTGATCGATAGGTCTGGGTAATCTTGTGAATGCGCATCGTGCTAGGGATAGACTGTTGCAATTTTCAGTCTTGAACGAGGAATTCCTAGTAAACGCAAGTCATCAGCTTGCATTGATTACGTCCCTGCCCTTTGTACACACCGCCCGTCGCACCTACCGATTGAATGACTCGGTGAAAAATTGGGACC-------GTGA-------GTCCGTTTGC-TTCATTGCGAGTGGAT-GATG-GG-----------------------------------------------------------------------------------
>JN635039
-------------------------------------------------------TTAAGCCATGCATGTCTAAGTATAAACACGTTTGTACTGTGAAACTGCGAATGGCTCATTATATCAGTTATAGTCCACTCGATAGTACCTTACTACTTGGATAACCGTAGTAATTCTAGAGCTAATACATGCAT-AAATACCCAACTG---CTTGTCGGGCGGGTAGCATTTATTAGATTGAAACCAATGCAG---TCTTCGG---GCTGGTATTGTGTTGAGTCATAATAACTGTGCGGATCGCG----CTT--TTGC-----GCGATAAATCGATTGAGTTTCTGCCCTATCAGCTTTGGATGGTAGGATATGGGCCTACCATGGCATTAACGGGTAACGGGGAATTAGGGTTTGATTCCGGAGAGGGAGCCTTAGAAACGGCTACCACATCCAAGGAAGGCAGCAGGCGCGTAAATTACCCAATCCTGATAC-AGGGAGGTAGTGACAATAAATAACAATGCTCTGGCTCTTCGAGTCGGGCAATTGGAATGAGAACAATTTAAATCCCTTAACGAGGATCAATTGGAGGGCAAGTCTGGTGCCAGCAGCCGCGGTAATTCCAGCTCCAATAGCGTATATTAAAGTTGTTGCAGTTAAAAAGCTCGTAGTTGGATTTC--TGCTT-TGGATG---TCCGGTCCGC--TCCCTCTGGGAGTGT--GTAC-TTATG-GATATTCGA-G-GCATT-CTTTGTGAGGCTGCCTTT---CTGCCATTAAGTTGG-TGGGTTGGTGGGCTTGCA--TCGTTTACTGTGAAAAAATTAGAGTGTTTAAAGCAGGCG-TT--TGCT--CATTTGAATACATTAGCATGGAATAATAAGATATGGCCTTGGTGGTCTATTTTGTTGGTTTGCACA-CCAGGGTAATGATTAATAGGGACAGTT-GGGGGTATTCATATTTCAG-CGTCAGAGGTGAAATTCTTGGATCGCTGAAAGATGAGCTTAGGCGAAAGCATTTACCAAGGATGTTTTCATTAATCAAGAACGAAAGTTAGGGGATCGAAGATGATTAGATACCATCGTAGTCTTAACCATAAACTATGCCGACTCGGGATTGGCAGTCGTT-TA---CTTTAAATGACCTTGTCAGCACCGTATGAGAAATCAAAGTCTTTGGGTTCC-GGGGGGAGTATGGTCGCAAGGCTGAAACTTAAAGGAA--TTGACGGAAGGGCACCACCAGGAGTGGAGCCTGCGGCTTAATTTGACTCAACACGGGAAAACTTACCAGGTCCAGACATAGTAA-GGATTGACAGATTGAGAGCTCTTTCTTGA-TTCTATGGGTGGTGGTGCATGG-CCGTTCTTAGTTGGTG-GAGTGATTTGTCTGGTTAATTCCGTTAACGAACGAGACCTCCGCGTGCTAAATAGTTC-CGCTTAC-CA-TTTTTGGTAGGTTTG--TGGACTTCTTAGAGGGACTTTTGGGTAATCAAACCAAAGGAAGTTGGAGGCAATAACAGGTCTGTGATGCCCTTAGATGTTCTGGGCCGCACGCGCGCTACACTGATGCGTTCAACGAGTATACAACCTTGATCGATAGGTCTGGGTAATCTTGTGAATGCGCATCGTGCTAGGGATAGACTGTTGCAATTTTCAGTCTTGAACGAGGAATTCCTAGTAAACGCAAGTCATCAGCTTGCATTGATTACGTCCCTGCCCTTTGTACACACCGCCCGTCGCACCTACCGATTGAATGACTCGGTGAAAAATTGGGACC-------GTGA-------GTCTGTTTGC-TTTATTGCGAGTGGATTGATG-GG-----------------------------------------------------------------------------------
>EF426540
-------------------------------GTAGTCATATGCTTGTCTCAAAGATCAAGCCATGCATGTCTAAGTATAAACNAATTTGTACTGTGAAACTGCGAATGGCTCATTATATCAGTTATAGTCCACTCGATAGTACCTTACTACTTGGATAACCGTAGTAATTCTAGAGCTAATACATGCAT-AAATACCCAACTG---CTTGTCGGGCGGGTAGCATTTATTAGATTGAAACCAATGCAG---TCTTCGG---GCTGGTATTGTGTTGAGTCATAATAACTGTGCGGATCGCG----CTT--TTGC-----GCGATAAATCGATTGAGTTTCTGCCCTATCAGCTTTGGATGGTAGGATATGGGCCTACCATGGCATTAACGGGTAACGGGGAATTAGGGTTTGATTCCGGAGAGGGAGCCTTAGAAACGGCTACCACATCCAAGGAAGGCAGCAGGCGCGTAAATTACCCAATCCTGATAC-AGGGAGGTAGTGACAATAAATAACAATGCTCTGGCTCTTCGAGTCGGGCAATTGGAATGAGAACAATTTAAATCCCTTAACGAGGATCAATTGGAGGGCAAGTCTGGTGCCAGCAGCCGCGGTAATTCCAGCTCCAATAGCGTATATTAAAGTTGTTGCAGTTAAAAAGCTCGTAGTTGGATTTC--TGCTT-TGGATG---TCCGGTCCGT--TCCCTTTGGGAGTGT--GTAC-TTATG-GATGTTCGA-A-GCATT-TTTTGTGAGGTTGCCTTT---CTGCCATTAAGTTGG-TGGATTGGTGAACTTACA--TCGTTTACTGTGAAAAAATTAGAGTGTTTAAAGCAGGCG-TT--AGCT--CATTTGAATACATTAGCATGGAATAATAAGATATGACTTTGGTGGTCTATTTTGTTGGTTTGCACA-CCAGAGTAATGATTAATAGGGACAGTT-GGGGGTATTCATATTTCAG-CGTCAGAGGTGAAATTCTTGGATCGCTGAAAGATGAGCTTAGGCGAAAGCATTTACCAAGGATGTTTTCATTAATCAAGAACGAAAGTTAGGGGATCGAAGATGATTAGATACCATCGTAGTCTTAACCATAAACTATGCCGACTCGGGATTGGCAGTCGTT-TA---CTTAAAATGACCTTGTCAGCACCGTATGAGAAATCAAAGTCTTTGGGTTCC-GGGGGGAGTATGGTCGCGAGGCTGAAACTTGAAGGAA--TTGACGGAAGGGCACCACCAGGAGTGGAGCCTGCGGCTTAATTTGACTCAACACGGGAAAACTTACCAGGTCCAGACATAGTAA-GGATTGACAGATTGAGAGCTCTTTCTTGA-TTCTATGGGTGGTGGTGCATGG-CCGTTCTTAGTTGGTG-GAGTGATTTGTCTGGTTAATTCCGTTAACGAACGAGACCTCCGCGTGCTAAATAGTTC-CGCTTAC-CA-TTTTTGGTAGGTTTG--TGGACTTCTTAGAGGGACTTTTGGGTAATCAAACCAAAGGAAGTTGGAGGCAATAACAGGTCTGTGATGCCCTTAGATGTTCTGGGCCGCACGCGCGCTACACTGATGCGTTCAACGAGTATATAACCTTGATCGATAGGTCTGGGTAATCTTGTGAATGCGCATCGTGCTAGGGATAGACTGTTGCAATTTTCAGTCTTGAACGAGGAATTCCTAGTAAATGCAAGTCATCAGCTTGCGTTGATTACGTCCCTGCCCTTTGTACACACCGCCCGTCGCACCTACCGATTGAATGACTCGGTGAAAAATTGGGACC-------GTGA-------GTCCGCTTGC-TTTATTGCGAGTGGATTGATG-GGAACTTTTTTAAACCTCGCCATTTAGAGGAAGGTGAAGTCGTAACAAGGTTTCCGTAGGTGAACCTGCGGAAGGATCA------
>AY598709_(modified)
------------------------------------------------TCAAAGATTAAGCCATGCATGTCTAAGTATAAACAATTCTATACTGTGAAACTGCGAATGGCTCATTATATCAGTTATAGTCTACTCGATAGTACCTTACTACTTGGATAACCGTAGTAATTCTAGAGCTAATACATGCAT-CGATACCCAACTG---CTTGTCGGGCGGGTAGCATTTATTAGATTGAAACCAATGCAG---TCTTCGG---GCTGGTATTGTGTTGAGTCATAATAACTGTGCGGATCGCA----CT---CTGT-----GCGATAAGTCGATTGAGTTTCTGCCCTATCAGCTTTGGATGGTAGGATATGGGCCTACCATGGCATTAACGGGTAACGGGGAATTAGGGTTTGATTCCGGAGAGGGAGCCTTAGAAACGGCTACCACATCCAAGGAAGGCAGCAGGCGCGTAAATTACCCAATCCTGACAC-AGGGAGGTAGTGACAATAAATAACAATGCTCTGGCTCTTCGAGTCGGGCAATTGGAATGAGAACAATTTAAATCCCTTAACGAGGATCAATTGGAGGGCAAGTCTGGTGCCAGCAGCCGCGGTAATTCCAGCTCCAATAGCGTATATTAAAGTTGTTGCAGTTAAAAAGCTCGTAGTTGGATTTC--TGTCA-GGAGCG---TCCGGTCGGC--TCCCTTTGGGAGTGT--GTAC--TTTGTGATGTTCTC-G-GCATT-TTTTGTGAGGATGTTCTT---CTGCCATTAAGTTGG-TGGTTGGATAGACTTGCA--TCGTTTACTGTGAAAAAATTAGAGTGTTTAAAGCAGGCG-TT--TGCT---CATTGAATACATTAGCATGGAATAATAAGATACGACCTTGGTGGTCTATTTTGTTGGTTTGCACA-CCAGGGTAATGATTAATAGGGACAGTT-GGGGGTATTCATATTTCAG-CGTCAGAGGTGAAATTCTTGGATCGCTGAAAGATGAGCTTAGGCGAAAGCATTTACCAAGGATGTTTTCATTAATCAAGAACGAAAGTTAGGGGATCGAAGATGATTAGATACCATCGTAGTCTTAACCATAAACTATGCCGACTCGGGATTGGCAGTCGTT-T----TTTTAAATGACCTTGTCAGCACCGTATGAGAAATCAAAGTCTTTGGGTTCCGGGGGGGAGTATGGTCGCAAGGCTGAAACTTAAAGGAA--TTGACGGAAGGGCACCACCAGGAGTGGAGCCTGCGGCTTAATTTGACTCAACACGGGGAAACTTACCAGGTCCAGACATAGTAAGGGATTGACAGATTGAGAGCTCTTTCTTGA-TTCTATGGGTGGTGGTGCATGGCCCGTTCTTAGTTGGTG-GAGTGATTTGTCTGGTTAATTCCGTTAACGAACGAGACCTCCGCGTGCTAAATAGTTT-CGCTTAC-AA-TTTGTTGTAGGTTTG--GAGACTTCTTAGAGGGACTTTTGGGTAATCAAACCAAAGGAAGTTGGAGGCAATAACAGGTCTGTGATGCCCTTAGATGTTCTGGGCCGCACGCGCGCTACACTGATGCGTTCAACGAGTATACAACCTTGATCGATAGGTCTGGGTAATCTTTTGAATGCGCATCGTGCTAGGGATAGATTGTTGCAATTTTCAATCTTGAACGAGGAATTCCTAGTAAACGCAAGTCATCAGCTTGCATTGATTACGTCCCTGCCCTTTGTACACACCGCCCGTCGCACCTACCGATTGAATGACTCGGTGAAAAATTGGGACC-------GTGA-------GCCTGTTTGC-TTTATTGCGAGCGGATTCGTG-GGAACTTTTTTTAACCTCGCCATTTAGAGGAAGGTGAAGTCGTAACAAGGTTTCCGTAGGTGAACCTGCGGAAGGATCATTA---
>HQ643854_(modified)
-----------------------------------------GCTTGTCTCAAAGATTAAGCCATGCATGTCTAAGTATAAACAACTTTGTACTGTGAAACTGCGAATGGCTCATTATATCAGTTATAGTCTACTCGATAGTACCTTACTACTTGGATAACCGTAGTAATTCTAGAGCTAATACATGCAT-ACATACCCAACTG---CTTGTCGGGCGGGTAGCATTTATTAGATTGAAACCAATGCAG---CTTTCGG---GCTGGTATTGTGTTGAGTCATAATAACTGTGCGGATCGCA----CT---CTGT-----GCGATAAATCGATTGAGTTTCTGCCCTATCAGCTTTGGATGGTAGGATATGGGCCTACCATGGCATTAACGGGTAACGGGGAATTAGGGTTTGATTCCGGAGAGGGAGCCTTAGAAACGGCTACCACATCCAAGGAAGGCAGCAGGCGCGTAAATTACCCAATCCTGACAC-AGGGAGGTAGTGACAATAAATAACAATGCTCTGGCTCTTCGAGTCGGGCAATTGGAATGAGAACAATTTAAATCCCTTAACGAGGATCAATTGGAGGGCAAGTCTGGTGCCAGCAGCCGCGGTAATTCCAGCTCCAATAGCGTATATTAAAGTTGTTGCAGTTAAAAAGCTCGTAGTTGGATTTC--TGTCT-GGAGCG---TCCGGTCGGC--TCTCTTTGAGAGTGT--GTAC--TTTGTGATGTTCGA-G-GCATT-TTTTGTGAGGATGTCTTT---CTGCCATTAAGTTGG-TGGTTGGATAGACTTGCA--TCGTTTACTGTGAAAAAATTAGAGTGTTTAAAGCAGGCG-TT--TGCT---CATTGAATACATTAGCATGGAATAATAAGATACGACCTTGGTGGTCTATTTTGTTGGTTTGCACA-CCAGGGTAATGATTAATAGGGACAGTT-GGGGGTATTCATATTTCAG-CGTCAGAGGTGAAATTCTTGGATCGCTGAAAGATGAGCTTAGGCGAAAGCATTTACCAAGGATGTTTTCATTAATCAAGAACGAAAGTTAGGGGATCGAAGATGATTAGATACCATCGTAGTCTTAACCATAAACTATGCCGACTCGGGATTGGCAGTCGTT-T----TTTCAAATGACCTTGTCAGCACCGTATGAGAAATCAAAGTCTTTGGGTTCC-GGGGGGAGTATGGTCGCAAGGCTGAAACTTAAAGGAA--TTGACGGAAGGGCACCACCAGGAGTGGAGCCTGCGGCTTAATTTGACTCAACACGGGGAAACTTACCAGGTCCAGACATAGTAA-GGATTGACAGATTGAGAGCTCTTTCTTGA-TTCTATGGGTGGTGGTGCATGG-CCGTTCTTAGTTGGTG-GAGTGATTTGTCTGGTTAATTCCGTTAACGAACGAGACCTCCGCGTGCTAAATAGTTT-CGCTTAC-AA-TTTTTTGTAGGTTGG---AGACTTCTTAGAGGGACTTTTGGGTAATCAAACCAAAGGAAGTTGGAGGCAATAACAGGTCTGTGATGCCCTTAGATGTTCTGGGCCGCACGCGCGCTACACTGATGCGTTCAACGAGTATACAACCTTGATCGATAGGTCTGGGTAATCTTTTGAATGCGCATCGTGCTAGGGATAGATTGTTGCAATTTTCAATCTTGAACGAGGAATTCCTAGTAAACGCAAGTCATCAGCTTGCATTGATTACGTCCCTGCCCTTTGTACACACCGCCCGTCGCACCTACCGATTGAATGACTCGGTGAAAAATTGGGACC-------GTGA-------GCCTGTTTGC-TTTATTGCGAGCGGATTCGTG-GGAACTTTTTTTAACCTCGCCATTTAGAGGAAGGTGAAGTCGTAACAAGGTTTCCGTAGGTGAACCTGCGGAAGGATCATTA---
>JN635163
-------------------------------------------------------TTAAGCCATGCATGTCTAAGTATAAACAATTTTGTACTGTGAAACTGCGAATGGCTCATTATATCAGTTATAGTCTACTCGATAGTACCTTACTACTTGGATAACCGTAGTAATTCTAGAGCTAATACATGCAT-GAATACCCAACTG---CTTGTCGGGCGGGTAGCATTTATTAGATTGAAACCAATGCAG---TCTTCGG---GCTGGTATTGTGTTGAGTCATAATAACTGTGCGGATCGCA----CT---TTGT-----GCGATAAATCGATTGAGTTTCTGCCCTATCAGCTTTGGATGGTAGGATATGGGCCTACCATGGCATTAACGGGTAACGGGGAATTAGGGTTTGATTCCGGAGAGGGAGCCTTAGAAACGGCTACCACATCCAAGGAAGGCAGCAGGCGCGTAAATTACCCAATCCTGACAC-AGGGAGGTAGTGACAATAAATAACAATGCTCTGGCTCTTCGAGTCGGGCAATTGGAATGAGAACAATTTAAATCCCTTAACGAGGATCAATTGGAGGGCAAGTCTGGTGCCAGCAGCCGCGGTAATTCCAGCTCCAATAGCGTATATTAAAGTTGTTGCAGTTAAAAAGCTCGTAGTTGGATTTC--TGTTT-TGAGCG---TCCGGTCGGC--TCCCTCTGGGAGTGT--GTAC-TTTTGCGACGTTCGA-G-GCATT-TTTTGTGAGGACGTGTTT---CTGCCATTAAGTTGG-TGGTTTTGCGGACTTGCA--TCGTTTACTGTGAAAAAATTAGAGTGTTTAAAGCAGGCG-TT--TGCT---CATTGAATACATTAGCATGGAATAATAAGATACGACCTTGGTGGTCTATTTTGTTGGTTTGCACA-CCAGGGTAATGATTAATAGGGACAGTT-GGGGGTATTCATATTTCAG-CGTCAGAGGTGAAATTCTTGGATCGCTGAAAGATGAGCTTAGGCGAAAGCATTTACCAAGGATGTTTTCATTAATCAAGAACGAAAGTTAGGGGATCGAAGATGATTAGATACCATCGTAGTCTTAACCATAAACTATGCCGACTCGGGATTGGCAGTCGTT-T----TTTTAAATGACCTTGTCAGCACCGTATGAGAAATCAAAGTCTTTGGGTTCC-GGGGGGAGTATGGTCGCAAGGCTGAAACTTAAAGGAA--TTGACGGAAGGGCACCACCAGGAGTGGAGCCTGCGGCTTAATTTGACTCAACACGGGGAAACTTACCAGGTCCAGACATAGTAA-GGATTGACAGATTGAGAGCTCTTTCTTGA-TTCTATGGGTGGTGGTGCATGG-CCGTTCTTAGTTGGTG-GAGTGATTTGTCTGGTTAATTCCGTTAACGAACGAGACCTCCGCGTGCTAACTAGTTC-CGCTTAC-AA-TTTTTTGTAGGTTTT--GGGACTTCTTAGAGGGACTTTTGGGTAATCAAACCAAAGGAAGTTGGAGGCAATAACAGGTCTGTGATGCCCTTAGATGTTCTGGGCCGCACGCGCGCTACACTGATGCGTTCAACGAGTATACAACCTTGATCGATAGGTCTGGGTAATCTTTTGAATGCGCATCGTGCTAGGGATAGATTGTTGCAATTTTCAATCTTGAACGAGGAATTCCTAGTAAACGCAAGTCATCAGCTTGCATTGATTACGTCCCTGCCCTTTGTACACACCGCCCGTCGCACCTACCGATTGAATGACTCGGTGAAAAATTGGGACT-------GTGA-------GCCTGTTTGC-TTTA-TGCGAGTGGGTTTGTG-GG-----------------------------------------------------------------------------------
>AY598708_(modified)
-----------------------------------------GCTTGTCTCAAAGATTAAGCCATGCATGTCTAAGTATAAACAACTTTGTACTGTGAAACTGCGAATGGCTCATTATATCAGTTATAGTCTACTCGATAGTACCTTACTACTTGGATAACCGTAGTAATTCTAGAGCTAATACATGCAT-AAATACCCAACTG---CTTGTCGGGCGGGTAGCATTTATTAGATTGAAACCAATGCAG---TCTTCGG---GCTGGTATTGTGTTGAATCATAATAACTGTGCGGATCGCA----CTT--TTGT-----GCGATAAATCGATTGAGTTTCTGCCCTATCAGCTTTGGATGGTAGGATATGGGCCTACCATGGCATTAACGGGTAACGGGGAATTAGGGTTTGATTCCGGAGAGGGAGCCTTAGAAACGGCTACCACATCCAAGGAAGGCAGCAGGCGCGTAAATTACCCAATCCTGACAC-AGGGAGGTAGTGACAATAAATAACAATGCTCTGGCTCTTCGAGTCGGGCAATTGGAATGAGAACAATTTAAATCCCTTAACGAGGATCAATTGGAGGGCAAGTCTGGTGCCAGCAGCCGCGGTAATTCCAGCTCCAATAGCGTATATTAAAGTTGTTGCAGTTAAAAAGCTCGTAGTTGGATTTC--TGTTT-TGAGCG---TCCGGTCCGC--TTCCTCTGGGAGTGT--GTAC--TAAG-GATGTTTGA-G-GCATT-TTTTGTGAGGATGTTTTT---CTGCCATTAAGTTGG-TGGTTGAATAGACTTGCA--TCGTTTACTGTGAAAAAATTAGAGTGTTTAAAGCAGGCG-TT--TGCT---CATTGAATACATTAGCATGGAATAATAAGATACGACCTTGGTGGTCTATTTTGTTGGTTTGCACA-CCAGGGTAATGATTAATAGGGACAGTTGGGGGGTATTCATATTTTAG-CGTCAGAGGTGAAATTCTTGGATCGCTGAAAGATGAGCTTAGGCGAAAGCATTTACCAAGGATGTTTTCATTAATCAAGAACGAAAGTTAGGGGATCGAAGATGATTAGATACCATCGTAGTCTTAACCATAAACTATGCCGACTCGGGATTGGCAGTCGTT-TA----ATTTAATGACCTTGTCAGCACCGTATGAGAAATCAAAGTCTTTGGGTTCC-GGGGGGAGTATGGTCGCAAGGCTGAAACTTAAAGGAA--TTGACGGAAGGGCACCACCAGGAGTGGAGCCTGCGGCTTAATTTGACTCAACACGGGGAAACTTACCAGGTCCAGACATAGTAA-GGATTGACAGATTGAGAGCTCTTTCTTGA-TTCTATGGGTGGTGGTGCATGG-CCGTTCTTAGTTGGTG-GAGTGATTTGTCTGGTTAATTCCGTTAACGAACGAGACCTCCGCGTGCTAAATAGTTT-CGCTTAC-AA-TTTTTTGTAGGTTTG---AGACTTCTTAGAGGGACTTTTGGGTAATCAAACCAAAGGAAGTTGGAGGCAATAACAGGTCTGTGATGCCCTTAGATGTTCTGGGCCGCACGCGCGCTACACTGATGCGTTCAACGAGTATACAACCTTGATCGATAGGTCTGGGTAATCTTTTGAATGCGCATCGTGCTAGGGATAGATTGTTGCAATTTTCAATCTTGAACGAGGAATTCCTAGTAAACGCAAGTCATCAGCTTGCATTGATTACGTCCCTGCCCTTTGTACACACCGCCCGTCGCACCTACCGATTGAATGACTCGGTGAAAAATTGGGACT-------GTGA-------GTCTGTTTGC-TTTATTGCGAGTGGATTTATG-GGAACTTTTTTTAACCTCGCCATTTAGAGGAAGGTGAAGTCGTAACAAGGTTTCCGTAGGTGAACCTGCGGAAGGAT--------
>AY742755
-------------------------------GTAGTCATATGCTTGTCTCAAAGATTAAGCCATGCATGTCTAAGTATAAACAACTTTGTACTGTGAAACTGCGAATGGCTCATTATATCAGTTATAGTCTACTCGATAGTACCTTACTACTTGGATAACCGTAGTAATTCTAGAGCTAATACATGCAT-CAATACCCAACTG---CTTGTCGGACGGGTAGCATTTATTAGATTGAAACCAATGCAG---TCTTCGG---GCTGGTATTGTGTTGAGTCATAATAACTGTGCGGACCGCA----CTT--TTGT-----GCGGTAAATCGATTGAGTTTCTGCCCTATCAGCTTTGGATGGTAGGATATGGGCCTACCATGGCATTAACGGGTAACGGGGAATTAGGGTTTGATTCCGGAGAGGGAGCCTTAGAAACGGCTACCACATCCAAGGAAGGCAGCAGGCGCGTAAATTACCCAATCCTGACAC-AGGGAGGTAGTGACAATAAATAACAATGCTCTGGCTCTTCGAGTCGGGCAATTGGAATGAGAACAATTTAAATCCCTTATCGAGGATCAATTGGAGGGCAAGTCTGGTGCCAGCAGCCGCGGTAATTCCAGCTCCAATAGCGTATATTAAAGTTGTTGCAGTTAAAAAGCTCGTAGTTGGATTTC--TGTTT-TGAGCG---TCCGGTCCGC--TCCTTT--GGAGTGT--GTTA--CTAG-GATGTTTGA-G-ACATT-TTTTGTGAGGATGTCTTT---CTGCCATTCAGTTGG-TGGTTAGATAGACTTGCA--TCGTTTACTGTGAAAAAATTAGAGTGTTTAAAGCAGGCG-TT--TGCA---CATTGAATACATTAGCATGGAATAATAAGATACGACCTTGGTGGTCTATTTTGTTGGTTTGCACA-CCAGGGTAATGATTAATAGGGACAGTA-GGGGGTATTCATATTTCAG-CGTCAGAGGTGAAATTCTTGGATCGCTGAAAGATGAGCTTAGGCGAAAGCATTTACCAAGGATGTTTTCATTAATCAAGAACGAAAGTTAGGGGATCGAAGATGATTAGATACCATCGTAGTCTTAACCATAAACTATGCCGACTCGGGATTGGCAGTCGTT------TTTCAAATGACCTTGTCAGCACCGTATGAGAAATCAAAGTCTTTGGGTTCC-GGGGGGAGTATGGTCGCAAGGCTGAAACTTAAAGGAA--TTGACGGAAGGGCACCACCAGGAGTGGAGCCTGCGGCTTAATTTGACTCAACACGGGAAAACTTACCAGGTCCAGACATAGTAA-GGATTGACAGATTGAGAGCTCTTTCTTGA-TTCTATGGGTGGTGGTGCATGG-CCGTTCTTAGTTGGTG-GAGTGATTTGTCTGGTTAATTCCGTTAACGAACGAGACCTCCGCGTGCTAAATAGTCC-CGCTTAC-AA-TTTTTTGTAGGTAG---TGGACTTCTTAGAGGGACTTTTGGGTAATCAAACCAAAGGAAGTTGGAGGCAATAACAGGTCTGTGATGCCCTTAGATGTTCTGGGCCGCACGCGCGCTACACTGATGCGTTCGGCGAGTATACAACCTTGATCGATAGGTCTGGGTAATCTTGTGAATGCGCATCGTGCTAGGGATAGATTGTTGCAATTTTCAATCTTGAACGAGGAATTCCTAGTAAACGCAAGTCATCAGCTTGCATTGATTACGTCCCTGCCCTTTGTACACACCGCCCGTCGCGCCTACCGATTGAATGACTCGGTGAGAAATCGGGACC-------GTGA-------GTCCGTTTGC-TTCATTGCGAGTGGACTGATG-GGAACTTTTTCTAACCTCGCCATTTAGAGGAAGGTGAAGTCGTAACAAGGTTTCCGTAGGTGAACCTGCGGAAGGATCA------
>KF853243_1
-------------------------------------------------------TTAAGCCATGCATGTCTAAGTATAAGCACTTTTATACTGTGAAACTGCGAATGGCTCATTATATCAGTTATAGTCTACTCGATAGTACCTTACTACTTGGATAACCGTAGTAATTCTAGAGCTAATACATGCAT-GAATACCCAACTG---CTTGTCGGGCGGGTAGCATTTATTAGATTGAAACCAATGCAG---TCTTCGG---GCTGGTATTGTGTTGAGTCATAATAACTGTGCGGATCGCG----CTT--TTGC-----GCGATAAGTCGATTGAGTTTCTGCCCTATCAGCTTTGGATGGTAGGATATGGGCCTACCATGGCATTAACGGGTAACGGGGAATTAGGGTTTGATTCCGGAGAGGGAGCCTTAGAAACGGCTACCACATCCAAGGAAGGCAGCAGGCGCGTAAATTACCCAATCCTGACAC-AGGGAGGTAGTGACAATAAATAACAATGCTCTGGCTCTTCGAGTCGGGCAATTGGAATGAGAACAATTTAAATCCCTTAACGAGGATCAATTGGAGGGCAAGTCTGGTGCCAGCAGCCGCGGTAATTCCAGCTCCAATAGCGTATATTAAAGTTGTTGCAGTTAAAAAGCTCGTAGTTGGATTTC--TGTTT-TGAGCG---TCCGGTCGGC--TTCTTTGTGAAGTGT--GTAC-TTTTG-GATGTTTGA-G-GCATT-TTTTGTGAGGGTGTTTTT---CTGCCATTAAGTTGG-TGGTTGAACATGCTTGCA--TCGTTTACTGTGAAAAAATTAGAGTGTTTAAAGCAGGCG-TT--TGCT---CGTTGAATACATTAGCATGGAATAATAAGATACGACCTTGGTGGTCTATTTTGTTGGTTTGCACA-CCAGGGTAATGATTAATAGGGACAGTT-GGGGGTATTCATATTTCAG-CGTCAGAGGTGAAATTCTTGGATCGCTGAAAGATGAGCTTAGGCGAAAGCATTTACCAAGGATGTTTTCATTAATCAAGAACGAAAGTTAGGGGATCGAAGATGATTAGATACCATCGTAGTCTTAACCATAAACTATGCCGACTCGGGATTGGCAGTCGTT-TG----TTTAAATGACCTTGTCAGCACCGTATGAGAAATCAAAGTCTTTGGGTTCC-GGGGGGAGTATGGTCGCAAGGCTGAAACTTAAAGGAA--TTGACGGAAGGGCACCACCAGGAGTGGAGCCTGCGGCTTANTTTGACTCAACACGGGAAAACTTACCAGGTCCAGACATAGTAA-GGATTGACAGATTGAGAGCTCTTTCTTGA-TTCTATGGGTGGTGGTGCATGG-CCGTTCTTAGTTGGTG-GAGTGATTTGTCTGGTTAATTCCGTTAACGAACGAGACCTCCGCGTGCTAAATAGTTC-CGCTTAC-ACTTTTTGTGTAGGTTG---TGGACTTCTTAGAGGGACTTTTGGGTAATCAAACCAAAGGAAGTTGGAGGCAATAACAGGTCTGTGATGCCCTTAGATGTTCTGGGCCGCACGCGCGCTACACTGATGCGTTCAACGAGTATACAACCTTGATCGATAGGTCTGGGTAATCTTTTGAATGCGCATCGTGCTAGGGATAGATTGTTGCAATTTTCAATCTTGAACGAGGAATTCCTAGTAAACGCAAGTCATCAGCTTGCATTGATTACGTCCCTGCCCTTTGTACACACCGCCCGTCGCACCTACCGATTGAATGACTCGGTGAAAAATTGGGACT-------GTGA-------GTCCGTTTGC-TTTATTGCGAGTGGATTTATG-GG-----------------------------------------------------------------------------------
>GU994166
-------------------------------------------------------TTAAGCCATGCATGTCTAAGTATAAGCACTTTTATACTGTGAAACTGCGAATGGCTCATTATATCAGTTATAGTCTACTCGATAGTACCTTACTACTTGGATAACCGTAGTAATTCTAGAGCTAATACATGCAT-GAATACCCAACTG---CTCGTCGGGCGGGTAGCATTTATTAGATTGAAACCAATGCAG---TCTTCGG---GCTGGTATTGTGTTGAGTCATAATAACTGTGCGGATCGCG----ATT--GTTC-----GCGATAAGTCGATTGAGTTTCTGCCCTATCAGCTTTGGATGGTAGGATATGGGCCTACCATGGCATTAACGGGTAACGGGGAATTAGGGTTTGATTCCGGAGAGGGAGCCTTAGAAACGGCTACCACATCCAAGGAAGGCAGCAGGCGCGTAAATTACCCAATCCTGACAC-AGGGAGGTAGTGACAATAAATAACAATGCTCTGGCTCTTCGAGTCGGGCAATTGGAATGAGAACAATTTAAATCCCTTAACGAGGATCAATTGGAGGGCAAGTCTGGTGCCAGCAGCCGCGGTAATTCCAGCTCCAATAGCGTATATTAAAGTTGTTGCAGTTAAAAAGCTCGTAGTTGGATTTC--TGTTT-TGAGCG---TCCGGTCGGC--TTCTTTGTGAAGTGT--GTAC-TTTAG-GATGTTTGA-G-GCATT-TTTTGTGAGGGTGTTTTT---CTGCCATTAGGTTGG-TGGTTGAACATGCTTGCA--TCGTTTACTGTGAAAAAATTAGAGTGTTTAAAGCAGGCG-TT--TGCT---CGTTGAATACATTAGCATGGAATAATAAGATACGACCTTGGTGGTCTATTTTGTTGGTTTGCACA-CCAGGGTAATGATTAATAGGGACAGTT-GGGGGTATTCATATTTCAG-CGTCAGAGGTGAAATTCTTGGATCGCTGAAAGATGAGCTTCGGCGAAAGCATTTACCAAGGATGTTTTCATTAATCAAGAACGAAAGTTAGGGGATCGAAGATGATTAGATACCATCGTAGTCTTAACCATAAACTATGCCGACTCGGGATTGGCAGTCGTT-TG----TTTAAATGACCTTGTCAGCACCGTATGAGAAATCAAAGTCTTTGGGTTCC-GGGGGGAGTATGGTCGCAAGGCTGAAACTTAAAGGAA--TTGACGGAAGGGCACCACCAGGAGTGGAGCCTGCGGCTTAATTTGACTCAACACGGGAAAACTTACCAGGTCCAGACATAGTAA-GGATTGACAGATTGAGAGCTCTTTCTTGA-TTCTATGGGTGGTGGTGCATGG-CCGTTCTTAGTTGGTG-GAGTGATTTGTCTGGTTAATTCCGTTAACGAACGAGACCTCCGCGTGCTAAATAGTTC-CGCTTAC-ACTTTTTGTGTAGGTTG---TGGACTTCTTAGAGGGACTTTTGGGTAATCAAACCAAAGGAAGTTGGAGGCAATAACAGGTCTGTGATGCCCTTAGATGTTCTGGGCCGCACGCGCGCTACACTGATGCGTTCAACGAGTATACAACCTTGATCGATAGGTCTGGGTAATCTTTTGAATGCGCATCGTGCTAGGGATAGATTGTTGCAATTTTCAATCTTGAACGAGGAATTCCTAGTAAACGCAAGTCATCAGCTTGCATTGATTACGTCCCTGCCCTTTGTACACACCGCCCGTCGCACCTACCGATTGAAGGACTCGGTGAAAAATTGGGACT-------GTGA-------GTCCGTTTGC-TTTATTGCGAGTGGATTTATG-GG-----------------------------------------------------------------------------------
>KJ831613_(modified)
-----------------------------------------GCTTGTCTCAAAGATTAAGCCATGCATGTCTAAGTATAAGCACTTTTATACTGTGAAACTGCGAATGGCTCATTATATCAGTTATAGTCTACTCGATAGTACCTTACTACTTGGATAACCGTAGTAATTCTAGAGCTAATACATGCAT-GAATACCCAACTG---CTTGTCGGGCGGGTAGCATTTATTAGATTGAAACCAATGCAG---TCTTCGG---GCTGGTATTGTGTTGAGTCATAATAACTGTGCGGATCGCG----CTT--TTGC-----GCGATAAGTCGATTGAGTTTCTGCCCTATCAGCTTTGGATGGTAGGATATGGGCCTACCATGGCATTAACGGGTAACGGGGAATTAGGGTTTGATTCCGGAGAGGGAGCCTTAGAAACGGCTACCACATCCAAGGAAGGCAGCAGGCGCGTAAATTACCCAATCCTGACAC-AGGGAGGTAGTGACAATAAATAACAATGCTCTGGCTCTTCGAGTCGGGCAATTGGAATGAGAACAATTTAAATCCCTTAACGAGGATCAATTGGAGGGCAAGTCTGGTGCCAGCAGCCGCGGTAATTCCAGCTCCAATAGCGTATATTAAAGTTGTTGCAGTTAAAAAGCTCGTAGTTGGATTTC--TGTCT-GGAGCG---TCCGGTCGGC--TTCTTTGTGAAGTGT--GTAC-TTTTG-GATGTTTTG-G-GCATT-TTTTGTGAGGGTGTTTTT---CTGCCATTAGGTTGG-TGGTTGAACATGCTTGCA--TCGTTTACTGTGAAAAAATTAGAGTGTTTAAAGCAGGCG-TT--TGCT---CGTTGAATACATTAGCATGGAATAATAAGATACGACCTTGGTGGTCTATTTTGTTGGTTTGCACA-CCAGGGTAATGATTAATAGGGACAGTT-GGGGGTATTCATATTTCAG-CGTCAGAGGTGAAATTCTTGGATCGCTGAAAGATGAGCTTAGGCGAAAGCATTTACCAAGGATGTTTTCATTAATCAAGAACGAAAGTTAGGGGATCGAAGATGATTAGATACCATCGTAGTCTTAACCATAAACTATGCCGACTCGGGATTGGCAGTCGTT-TG----TTTAAATGACCTTGTCAGCACCGTATGAGAAATCAAAGTCTTTGGGTTCC-GGGGGGAGTATGGTCGCAAGGCTGAAACTTAAAGGAA--TTGACGGAAGGGCACCACCAGGAGTGGAGCCTGCGGCTTAATTTGACTCAACACGGGAAAACTTACCAGGTCCAGACATAGTAA-GGATTGACAGATTGAGAGCTCTTTCTTGA-TTCTATGGGTGGTGGTGCATGG-CCGTTCTTAGTTGGTG-GAGTGATTTGTCTGGTTAATTCCGTTAACGAACGAGACCTCCGCGTGCTAAATAGTTC-CGCTTAC-ACTTTTTGTGTAGGTTG---TGGACTTCTTAGAGGGACTTTTGGGTAATCAAACCAAAGGAAGTTGGAGGCAATAACAGGTCTGTGATGCCCTTAGATGTTCTGGGCCGCACGCGCGCTACACTGATGCGTTCAACAAGTATACAACCTTGATCGATAGGTCTGGGTAATCTTTTGAATGCGCATCGTGCTAGGGATAGATTGTTGCAATTTTCAATCTTGAACGAGGAATTCCTAGTAAACGCAAGTCATCAGCTTGCATTGATTACGTCCCTGCCCTTTGTACACACCGCCCGTCGCACCTACCGATTGAATGACTCGGTGAAAAATTGGGACT-------GTGA-------GTCCGTTTGC-TTTATTGCGAGTGGATTTATG-GGAACTTTTTTTAACCTCGCCATTTAGAGGAAGGTGAAGTCGTAACAAGGTTTCCGTAGGTGAACCTGCGGAAGGATCATTA---
>EF426539
-------------------------------GTAGTCATATGCTTGTCTCAAAGATTAAGCCATGCATGTCTAAGTATAAACACTTTTATACTGTGAAACTGCGAATGGCTCATTATATCAGTTATAGTCTACTCGATAGTACCTTACTACTTGGATACCCGTAGTAATTCTAGAGCTAATACATGCAT-CAATACCCAACTG---CTTGTCGGGCGGGTAGCATTTATTAGATTGAAACCAATGCAG---TCTTCGG---GCTGGTATTGTGTTGAGTCATAATAACTGTGCGGATCGCG----CTT--TTGC-----GCGATAAGTCGATTGAGTTTCTGCCCTATCAGCTTTGGATGGTAGGATATGGGCCTACCATGGCATTAACGGGTAACGGGGAATTAGGGTTTGATTCCGGAGAGGGAGCCTTAGAAACGGCTACCACATCCAAGGAAGGCAGCAGGCGCGTAAATTACCCAATCCTGACAC-AGGGAGGTAGTGACAATAAATAACAATGCTCTGGCTCTTCGAGTCGGGCAATTGGAATGAGAACAATTTAAATCCCTTAACGAGGATCAATTGGAGGGCAAGTCTGGTGCCAGCAGCCGCGGTAATTCCAGCTCCAATAGCGTATATTAAAGTTGTTGCAGTTAAAAAGCTCGTAGTTGGATTTC--TGCTT-TGAGCG---TCCGGTCCGC----TTCTGTGAAGTGT--GTAC--TCTG-GATGTTTGA-G-GCATT-TTTTGTGAGGATGTTTTT---CTGCCATTAAGTTGG-TGGTTGAACAGACTTGCA--TCGTTTACTGTGAAAAAATTAGAGTGTTTAAAGCAGGCG-TT--TGCT---CGTTGAATACATTAGCATGGAATAATAAGATACGACCTTGGTGGTCTATTTTGTTGGTTTGCACA-CCAGGGTAATGATTAATAGGGACAGTT-GGGGGTATTCATATTTCAG-CGTCAGAGGTGAAATTCTTGGATCGCTGAAAGATGAGCTTAGGCGAAAGCATTTACCAAGGATGTTTTCATTAATCAAGAACGAAAGTTAGGGGATCGAAGATGATTAGATACCATCGTAGTCTTAACCATAAACTATGCCGACTCGGGATTGGCAGTCGTT-TG----TTTAAATGACCTTGTCAGCACCGTATGAGAAATCAAAGTCTTTGGGTTCC-GGGGGGAGTATGGTCGCAAGGCTGAAACTTAAAGGAA--TTGACGGAAGGGCACCACCAGGAGTGGAGCCTGCGGCTTAATTTGACTCAACACGGGAAAACTTACCAGGTCCAGACATAGTAA-GGATTGACAGATTGAGAGCTCTTTCTTGA-TTCTATGGGTGGTGGTGCATGG-CCGTTCTTAGTTGGTG-GAGTGATTTGTCTGGTTAATTCCGTTAACGAACGAGACCTCCGCGTGCTAAATAGTTC-CGCTTAC-A--CTTTGTGTAGGTTG---TGGACTTCTTAGAGGGACTTTTGGGTAATCAAACCAAAGGAAGTTGGAGGCAATAACAGGTCTGTGATGCCCTTAGATGTTCTGGGCCGCACGCGCGCTACACTGATGCGTTCAACGAGTATACAACCTTGATCGACAGGTCTGGGTAATCTTTTGAATGCGCATCGTGCTAGGGATAGATGGTTGCAATTTTCCATCTTGAACGAGGAATTCCTAGTAAACGCAAGTCATCAGCTTGCATTGATTACGTCCCTGCCCTTTGTACACACCGCCCGTCGCACCTACCGATTGAATGACTCGGTGAAAAATTGGGACT-------GTGA-------GTCCGTTTGC-TTTATTGCGAGTGGATTTATG-GGAACTTTTTTTAACCTCGCCATTTAGAGGAAGGTGAAGTCGTAACAAGGTTTCCGTAGGTGAACCTGCGGAAGGATCA------
