# Supplementary material for: Novel Widespread Marine Oomycetes Parasitising Diatoms, Including the Toxic Genus Pseudo-nitzschia: Genetic, Morphological, and Ecological Characterisation
Source: PubMed Central journal article supplement (PMC6286980; doi:10.3389/fmicb.2018.02918), 2018-12-03
Supplement: Table_1.pdf [file Table_1.pdf]

| Primer name | Reference                       | Sequence 3'-5'            |
|-------------|---------------------------------|---------------------------|
| 18SFW       | Grzebyk <i>et al.</i> , 1998    | TCCTGCCAGTAGTCATATGC      |
| 18SRV       | Grzebyk <i>et al.</i> , 1998    | TGATCCTTCGGCAGGTTAC       |
| D3B         | Nunn <i>et al.</i> , 1996       | TCGGAGGGAACCAGCTACTA      |
| F139        | Gachon <i>et al.</i> , 2017     | AGTCTATTTGATAGTACCTTACTAC |
| R1233       | Gachon <i>et al.</i> , 2017     | CAATCCTTACTATGTCTGG       |
| 18R7        | Chomérat <i>et al.</i> , 2010   | TGGAGCTGGAATTACCGCGGCT    |
| 1250R       | Hoppenrath <i>et al.</i> , 2007 | TAACGGAATTAACCAGACA       |
| SR9PR       | Yamaguchi and Horiguchi, 2005   | AACTAAGAACRGCCATGCAC      |
| SR9FW       | Freeman <i>et al.</i> , 2004    | TGCGGCTTAATTTGACTCAAC     |
| 1050F       | Chantangsi and Leander, 2010    | GGGGGAGTATGGTCGCRAAG      |
| 28SKARREV   | Nézan <i>et al.</i> , 2012      | AAACGGGAYTCTCACCTC        |

**Table S1:** Primers used in this study

## References

- Chantangsi, C. and Leander, B.S. (2010) An SSU rDNA barcoding approach to the diversity of marine interstitial cercozoans, including descriptions of four novel genera and nine novel species. *Int. J. Syst. Evol. Microbiol.* **60**: 1962–1977.
- Chomérat, N., Sellos, D.Y., Zentz, F., and Nézan, E. (2010) Morphology and molecular phylogeny of *Prorocentrum consutum* sp. nov. (dinophyceae), a new benthic dinoflagellate from south Brittany (northwestern France). *J. Phycol.* **46**: 183–194.
- Freeman, M., Hiroshi, Y., and Kazuo, O. (2004) A microsporidian parasite of the genus *Spraguea* in the nervous tissues of the Japanese anglerfish *Lophius litulon* tissues of the Japanese anglerfish *Lophius litulon*. *Folia Parasitol. (Praha)*. **51**: 167–176.
- Gachon, C.M.M., Strittmatter, M., Badis, Y., Fletcher, K.I., West, P. Van, Müller, D.G., et al. (2017) Pathogens of brown algae: culture studies of *Anisolpidium ectocarpii* and *A. rosenvingei* reveal that the Anisolpidiales are unflagellated oomycetes. *Eur. J. Phycol.* **52**: 133–148.
- Grzebyk, D., Berland, B., and Sako, Y. (1998) Phylogenetic analysis of nine species of *Prorocentrum* (Dinophyceae) inferred from 18S ribosomal DNA sequences, morphological comparisons, and description of *Prorocentrum panamensis*, sp. nov. *J. Phycol.* **34**: 1055–1068.
- Hoppenrath, M., Horiguchi, T., Miyoshi, Y., Selina, M., Taylor, M.F.J.R., and Leander, B.S. (2007) Taxonomy, phylogeny, biogeography, and ecology of *Sabulodinium undulatum* (Dinophyceae), including an amended description of the species. *Phycol. Res.* **55**: 159–175.
- Nézan, E., Tillmann, U., Bilien, G., Boulben, S., Chèze, K., Zentz, F., et al. (2012) Taxonomic revision of the dinoflagellate *Amphidoma caudata*: Transfer to the genus *Azadinium* (dinophyceae) and proposal of two varieties, based on morphological and molecular phylogenetic analyses. *J. Phycol.* **48**: 925–939.
- Nunn, G.B., Theisen, B.F., Christensen, B., and Arctander, P. (1996) Simplicity-Correlated Size Growth of the Nuclear 28S Ribosomal RNA D3 Expansion Segment in the Crustacean Order Isopoda. *J. Mol. Evol.* **42**: 211–223.
- Yamaguchi, A. and Horiguchi, T. (2005) Molecular phylogenetic study of the heterotrophic dinoflagellate genus *Protoperidinium* (Dinophyceae) inferred from small subunit rRNA gene sequences. *Phycol. Res.* **53**: 30–42.
