# Supplementary material for: Novel Widespread Marine Oomycetes Parasitising Diatoms, Including the Toxic Genus Pseudo-nitzschia: Genetic, Morphological, and Ecological Characterisation
Source: PubMed Central journal article supplement (PMC6286980; doi:10.3389/fmicb.2018.02918), 2018-12-03
Supplement: Table_2.pdf [file Table_2.pdf]

| Gblocks 0.91b                                        |                                           |
|------------------------------------------------------|-------------------------------------------|
| Number of sequences                                  | 81                                        |
| Alignment assumed to be                              | DNA                                       |
| New number of positions                              | 1206 (63% of the original 1896 positions) |
| Parameters used                                      |                                           |
| Minimum Number Of Sequences For A Conserved Position | 41                                        |
| Minimum Number Of Sequences For A Flanking Position  | 68                                        |
| Maximum Number Of Contiguous Nonconserved Positions  | 8                                         |
| Minimum Length Of A Block                            | 5                                         |
| Allowed Gap Positions                                | All                                       |
| Flank positions of the 3 selected blocks             | Flanks: [154 292] [308 689] [716 1398]    |

**Table S2: Gblocks parameters used in this study**
